# Supplementary material for: A facile synthesis of amphiphilic N-glycosyl naphthalimides and fabrication of flexible semiconductors using molecular self-assembly
Source: Royal Society of Chemistry journal article supplement (doi:10.1039/d1gc04509a), 2022-01-01
Supplement: d1gc04509a1.pdf [file d1gc04509a1.pdf]

## **A Facile Synthesis of Amphiphilic N-glycosyl naphthalimides and Fabrication of Flexible Semiconductor using Molecular Self-Assembly**

Arun Kumar Rachamalla,<sup>a</sup> Vara Prasad Rebaka,<sup>a</sup> Tohira Banoo,<sup>a</sup> Ravinder Pawar,<sup>a</sup> Mohammad Faizan,<sup>a</sup> Krishnamoorthy Lalitha,<sup>b</sup> Subbiah Nagarajan,<sup>\*a</sup>

a. Department of Chemistry, National Institute of Technology Warangal, Warangal - 506004, Telangana, India.

b. School of Chemical and Biotechnology, SASTRA Deemed University, Thanjavur – 613401, Tamil Nadu, India.

---

---

### **Table of contents**

|                                                                             |         |
|-----------------------------------------------------------------------------|---------|
| I. Characterization details                                                 | S2-S11  |
| II <b>Table S1.</b> Synthesis of sugar-based naphthalimides                 | S12-13  |
| I. <b>Table S2:</b> Gelation table                                          | S14     |
| II. Images of the optimized geometries of the reaction mechanism            | S15-S17 |
| III. <sup>1</sup> H & <sup>13</sup> C NMR Spectra of compounds 3a-g         | S18-S23 |
| IV. <sup>1</sup> H & <sup>13</sup> C NMR Spectra of compounds 5-7a-g        | S24-S44 |
| V. HRMS spectra of compounds 5-7a-g                                         | S45-S55 |
| VI. Optical microscopic images of the gel formed by 5d in CHCl <sub>3</sub> | S55     |

## Characterization details

**Compound 3a:** Amorphous yellow solid; yield: 92% (0.770 g)<sup>1</sup>

**Compound 3b:** Amorphous yellow solid; yield: 93% (0.301g); mp: 105-107 °C. IR (neat): 3433, 3356, 2922, 2850, 1690 and 1650 cm<sup>-1</sup>. <sup>1</sup>H NMR (400 MHz, DMSO-*d*<sub>6</sub>): δ 8.07 (d, *J* = 6.0 Hz, 1H), 8.02 (d, *J* = 8.0 Hz, 1H), 7.97 (d, *J* = 2.4 Hz, 1H), 7.60 (t, *J* = 7.8 Hz, 1H), 7.28 (d, *J* = 2.4 Hz, 1H), 5.99 (s, 2H), 4.0 (t, *J* = 7.4 Hz, 2H), 1.65 – 1.56 (m, 2H), 1.9-1.23 (m, 10H), 0.84 (t, *J* = 6.8 Hz, 3H). <sup>13</sup>C NMR (100 MHz, DMSO-*d*<sub>6</sub>) δ 164.20, 164.02, 148.34, 134.01, 131.89, 127.38, 125.83, 123.03, 122.23, 122.17, 121.03, 112.14, 31.68, 29.17, 29.04, 27.96, 26.99, 22.52, 14.38.

**Compound 3c:** Amorphous yellow solid; yield: 92% (0.324 g); mp: 95-97 °C. IR (neat): 3471, 3371, 2918, 2849, 1682 and 1647 cm<sup>-1</sup>. <sup>1</sup>H NMR (400 MHz, DMSO-*d*<sub>6</sub>): δ 8.06 (d, *J* = 7.2 Hz, 1H), 8.03 (d, *J* = 8.0 Hz, 1H), 7.97 (d, *J* = 2.0 Hz, 1H), 7.60 (t, *J* = 7.8 Hz, 1H), 7.28 (d, *J* = 2.1 Hz, 1H), 5.98 (s, 2H), 3.99 (t, *J* = 7.4 Hz, 2H), 1.65 – 1.55 (m, 2H), 1.34 - 1.28 (m, 4H), 1.25 – 1.19 (m, 10H), 0.83 (t, *J* = 6.8 Hz, 3H). <sup>13</sup>C NMR (101 MHz, DMSO-*d*<sub>6</sub>) δ 164.20, 164.02, 148.35, 134.01, 131.89, 127.37, 125.83, 123.03, 122.23, 122.17, 121.03, 112.14, 31.73, 29.39, 29.37, 29.19, 29.13, 27.95, 26.97, 22.54, 14.39.

**Compound 3d:** Amorphous yellow solid; yield: 93% (0.353 g); mp: 89-91 °C. IR (neat): 3470, 3367, 2918, 2848, 1702 and 1658 cm<sup>-1</sup>. <sup>1</sup>H NMR (400 MHz, DMSO-*d*<sub>6</sub>): δ 8.07 (d, *J* = 6.4 Hz, 1H), 8.02 (d, *J* = 8.4 Hz, 1H), 7.97 (d, *J* = 2.4 Hz, 1H), 7.60 (t, *J* = 7.8 HZ, 1H), 7.28 (d, *J* = 2.4 HZ, 1H), 5.98 (s, 2H), 4.0 (t, *J* = 7.4 Hz, 2H), 1.65 – 1.55 (m, 2H), 1.33 – 1.27 (m, 4H), 1.25 – 1.19 (m, 14H), 0.84 (t, *J* = 6.8 Hz, 3H). <sup>13</sup>C NMR (101 MHz, DMSO-*d*<sub>6</sub>) δ 164.20, 164.02, 148.35, 134.02, 131.90, 127.37, 125.83, 123.03, 122.23, 122.18, 121.03, 112.14, 31.75, 29.47, 29.45, 29.42, 29.35, 29.19, 29.15, 27.95, 26.96, 22.55, 14.40.

**Compound 3e:** Amorphous yellow solid; Yield: 90%(0.367 g); mp: 91-93 °C. IR (neat): 3460, 3359, 2916, 2848, 1697 and 1651 cm<sup>-1</sup>. <sup>1</sup>H NMR (400 MHz, DMSO-*d*<sub>6</sub>) δ 8.06 (d, *J* = 6.4 Hz, 1H), 8.02 (d, *J* = 8.0 Hz, 1H), 7.97 (d, *J* = 2.4 Hz, 1H), 7.60 (t, *J* = 7.8

Hz, 1H), 7.28 (d,  $J = 2.4$  Hz, 1H), 5.98 (s, 2H), 3.99 (t,  $J = 7.4$  Hz, 2H), 1.67-1.54 (m, 2H), 1.32-1.20 (m, 22H), 0.84 (t,  $J = 6.8$  Hz, 3H).  $^{13}\text{C}$  NMR (101 MHz, DMSO- $d_6$ )  $\delta$  168.95, 168.77, 153.10, 138.77, 136.65, 132.12, 130.58, 127.78, 126.98, 125.79, 116.90, 36.50, 34.21, 34.16, 34.09, 33.94, 33.91, 32.71, 31.71, 31.04, 27.30, 19.14.

**Compound 3f:** Amorphous yellow solid; Yield: 91% (0.396 g); mp: 84-86 °C. IR (neat): 3459, 3358, 2916, 2848, 1696 and 1650  $\text{cm}^{-1}$ .  $^1\text{H}$  NMR (400 MHz, DMSO- $d_6$ )  $\delta$  8.06 (d,  $J = 6.4$  Hz, 1H), 8.01 (d,  $J = 8.4$  Hz, 1H), 7.96 (d,  $J = 2.4$  Hz, 1H), 7.59 (t,  $J = 7.8$  Hz, 1H), 7.27 (d,  $J = 2.4$  Hz, 1H), 5.98 (s, 2H), 3.99 (t,  $J = 7.4$  Hz, 2H), 1.65 – 1.55 (m, 2H), 1.30 – 1.18 (m, 26H), 0.83 (t,  $J = 6.8$  Hz, 3H).  $^{13}\text{C}$  NMR (101 MHz, DMSO- $d_6$ )  $\delta$  164.19, 164.01, 148.35, 134.01, 131.88, 127.35, 125.81, 123.02, 122.23, 122.18, 121.03, 112.14, 31.75, 29.46, 29.35, 29.17, 27.96, 26.97, 22.55, 14.38.

**Compound 3g:** Amorphous yellow solid; Yield: 95% (0.440 g); mp: 76 - 78 °C. IR (neat): 3470, 3368, 2915, 2847, 1699 and 1657  $\text{cm}^{-1}$ .  $^1\text{H}$  NMR (400 MHz, DMSO- $d_6$ )  $\delta$  8.06 (d,  $J = 7.2$  Hz, 1H), 8.02 (d,  $J = 8.4$  Hz, 1H), 7.96 (d,  $J = 2.4$  Hz, 1H), 7.60 (t,  $J = 7.8$  Hz, 1H), 7.27 (d,  $J = 2.0$  Hz, 1H), 5.98 (s, 2H), 4.0 (t,  $J = 7.4$  Hz, 2H), 1.65 – 1.55 (m, 2H), 1.33 – 1.27 (m, 4H), 1.25 – 1.19 (m, 26H), 0.83 (t,  $J = 6.8$  Hz, 3H).  $^{13}\text{C}$  NMR (101 MHz, DMSO- $d_6$ )  $\delta$  164.19, 164.02, 148.35, 134.02, 131.89, 127.36, 125.82, 123.03, 122.23, 122.18, 121.04, 112.14, 31.75, 29.46, 29.34, 29.16, 27.96, 26.97, 22.55, 14.38

**5-N-glucosyl-2-hexyl-1H-benzo[de]isoquinoline-1,3(2H)-dione 5a:** Amorphous yellow solid; yield: 93% (0.425 g); mp: 147 – 149 °C. IR (KBr,  $\text{cm}^{-1}$ ): 3376, 2924, 2853, 1699, 1649.  $^1\text{H}$  NMR (400 MHz, DMSO- $d_6$ )  $\delta$  8.14 (d,  $J = 7.6$  Hz, 1H), 8.11 (d,  $J = 8.8$  Hz, 1H), 8.09 (d,  $J = 2.4$  Hz, 1H), 7.66 (t,  $J = 8.0$  Hz, 1H), 7.44 (d,  $J = 2.0$  Hz, 1H), 7.20 (d,  $J = 7.6$  Hz, 1H), 5.03 (d,  $J = 4.8$  Hz, 1H), 4.96 (dd,  $J = 11.6, 5.2$  Hz, 2H), 4.58 (t,  $J = 8.0$  Hz, 1H), 4.46 (t,  $J = 6.0$  Hz, 1H), 4.01 (t,  $J = 7.6$  Hz, 2H), 3.73 – 3.67 (m, 1H), 3.52 – 3.46 (m, 1H), 3.37 (m, 1H), 3.30 – 3.14 (m, 3H), 1.65 – 1.57 (m, 2H), 1.28 – 1.34 (m, 6H), 0.86 (t,  $J = 7.2$  Hz, 3H).  $^{13}\text{C}$  NMR (101 MHz, DMSO- $d_6$ )  $\delta$  164.14, 163.92, 146.66, 133.78, 132.60, 127.53, 126.50, 122.82, 122.27, 122.16, 121.70, 111.58, 85.12, 78.24, 77.98, 73.52, 70.56, 61.35, 31.44, 27.95, 26.68, 22.47, 14.39. HRMS (ESI,  $m/z$ ):  $[\text{M}+\text{H}]^+$  calcd. for  $\text{C}_{24}\text{H}_{31}\text{N}_2\text{O}_7$ : 459.2131; found: 459.2155.

**5-N-glucosyl-2-octyl-1H-benzo[de]isoquinoline-1,3(2H)-dione 5b:** Amorphous yellow solid; yield: 89% (0.432 g); mp: 152-154 °C. IR (KBr,  $\text{cm}^{-1}$ ): 3376, 2924, 2824, 1699, 1649.  $^1\text{H}$  NMR (400 MHz,  $\text{DMSO-}d_6$ )  $\delta$  8.14 (d,  $J = 7.6$  Hz, 1H), 8.10 (s, 1H), 8.09 (d,  $J = 2.4$  Hz, 1H), 7.66 (t,  $J = 8.0$  Hz, 1H), 7.44 (d,  $J = 2.0$  Hz, 1H), 7.20 (d,  $J = 7.6$  Hz, 1H), 5.03 (d,  $J = 4.4$  Hz, 1H), 4.96 (dd,  $J = 10.8, 5.2$  Hz, 2H), 4.58 (t,  $J = 8.0$  Hz, 1H), 4.46 (t,  $J = 6.0$  Hz, 1H), 4.01 (t,  $J = 7.6$  Hz, 2H), 3.71 – 3.68 (m, 1H), 3.52 – 3.46 (m, 1H), 3.42 – 3.35 (m, 1H), 3.31 – 3.13 (m, 3H), 1.66 – 1.56 (m, 2H), 1.36-1.30 (m, 4H), 1.28 – 1.22 (m, 6H), 0.85 (t,  $J = 6.8$  Hz, 3H).  $^{13}\text{C}$  NMR (101 MHz,  $\text{DMSO-}d_6$ )  $\delta$  164.16, 163.94, 146.69, 133.80, 132.60, 127.54, 126.51, 122.86, 122.28, 122.20, 121.73, 111.61, 85.15, 78.24, 77.99, 73.53, 70.58, 61.36, 31.70, 29.18, 29.06, 27.98, 27.03, 22.55, 14.42. HRMS (ESI,  $m/z$ ):  $[\text{M}+\text{H}]^+$  calcd. for  $\text{C}_{26}\text{H}_{35}\text{N}_2\text{O}_7$ : 487.2444; found: 487.2471.

**5-N-glucosyl-2-decyl-1H-benzo[de]isoquinoline-1,3(2H)-dione 5c:** Amorphous yellow solid; yield: 91% (0.467 g); mp: 159-161 °C. IR (KBr,  $\text{cm}^{-1}$ ): 3375, 2953, 2851, 1691, 1650.  $^1\text{H}$  NMR (400 MHz,  $\text{DMSO-}d_6$ )  $\delta$  8.13 (d,  $J = 7.2$  Hz, 1H), 8.10 (s, 1H), 8.09 (d,  $J = 2.4$  Hz, 1H), 7.66 (t,  $J = 7.6$  Hz, 1H), 7.44 (d,  $J = 2.0$  Hz, 1H), 7.20 (d,  $J = 7.6$  Hz, 1H), 5.03 (d,  $J = 4.4$  Hz, 1H), 4.96 (dd,  $J = 10.8, 5.2$  Hz, 2H), 4.58 (t,  $J = 8.0$  Hz, 1H), 4.46 (t,  $J = 6.0$  Hz, 1H), 4.01 (t,  $J = 7.6$  Hz, 2H), 3.71 – 3.68 (m, 1H), 3.52 – 3.46 (m, 1H), 3.39 – 3.35 (m, 1H), 3.29 – 3.16 (m, 3H), 1.65 – 1.57 (m, 2H), 1.31 (m,  $J = 2.8$  Hz, 4H), 1.23 (m, 10H), 0.84 (t,  $J = 6.8$  Hz, 3H).  $^{13}\text{C}$  NMR (101 MHz,  $\text{DMSO-}d_6$ )  $\delta$  164.18, 163.96, 146.71, 133.83, 132.62, 127.57, 126.52, 122.88, 122.28, 122.22, 121.74, 111.60, 85.14, 78.24, 77.99, 73.52, 70.56, 61.34, 31.76, 29.42, 29.39, 29.21, 29.15, 27.98, 27.01, 22.57, 14.44. HRMS (ESI,  $m/z$ ):  $[\text{M}+\text{H}]^+$  calcd. for  $\text{C}_{28}\text{H}_{39}\text{N}_2\text{O}_7$ : 515.2757; found: 515.2775.

**5-N-glucosyl-2-dodecyl-1H-benzo[de]isoquinoline-1,3(2H)-dione 5d:** Amorphous yellow solid; yield: 88% (0.476 g); mp: 137-139 °C. IR (KBr,  $\text{cm}^{-1}$ ): 3325, 2922, 2849, 1694, 1654.  $^1\text{H}$  NMR (400 MHz,  $\text{DMSO-}d_6$ )  $\delta$  8.13 (d,  $J = 7.2$  Hz, 1H), 8.10 (s, 1H), 8.09 (d,  $J = 2.0$  Hz, 1H), 7.66 (t,  $J = 8.0$  Hz, 1H), 7.44 (d,  $J = 2.0$  Hz, 1H), 7.20 (d,  $J = 7.6$  Hz, 1H), 5.03 (d,  $J = 4.4$  Hz, 1H), 4.96 (dd,  $J = 10.4, 5.2$  Hz, 2H), 4.58 (t,  $J = 8.0$  Hz, 1H), 4.46 (t,  $J = 6.0$  Hz, 1H), 4.01 (t,  $J = 7.6$  Hz, 2H), 3.71 – 3.68 (m, 1H), 3.52-3.46 (m, 1H), 3.36 (m, 1H), 3.28 – 3.18 (m, 3H), 1.65 – 1.56 (m, 2H), 1.31 (m, 4H), 1.23 (m, 14H), 0.85 (t,  $J = 7.2$  Hz, 3H).  $^{13}\text{C}$  NMR (101 MHz,  $\text{DMSO-}d_6$ )  $\delta$  164.16,

163.94, 146.67, 133.80, 132.61, 127.54, 126.51, 122.83, 122.27, 121.72, 111.59, 85.14, 78.23, 77.98, 73.52, 70.55, 61.34, 31.76, 29.40, 29.22, 29.16, 27.98, 27.01, 22.58, 14.44. HRMS (ESI, m/z): [M+H]<sup>+</sup> calcd. for C<sub>30</sub>H<sub>43</sub>N<sub>2</sub>O<sub>7</sub>: 543.3070; found: 543.3092.

**5-N-glucosyl-2-tetradecyl-1H-benzo[de]isoquinoline-1,3(2H)-dione 5e:** Amorphous yellow solid; yield: 86% (0.490 g); mp: 129-131 °C. IR (KBr, cm<sup>-1</sup>): 3323, 2922, 2849, 1695, 1654 <sup>1</sup>H NMR (400 MHz, DMSO-*d*<sub>6</sub>) δ 8.13 (d, *J* = 7.6 Hz, 1H), 8.10 (s, 1H), 8.09 (d, *J* = 2.4 Hz, 1H), 7.66 (t, *J* = 7.66 Hz, 1H), 7.44 (d, *J* = 2.0 Hz, 1H), 7.20 (d, *J* = 7.6 Hz, 1H), 5.03 (d, *J* = 4.4 Hz, 1H), 4.96 (dd, *J* = 10.4, 5.2 Hz, 2H), 4.58 (t, *J* = 8.0 Hz, 1H), 4.46 (t, *J* = 6.0 Hz, 1H), 4.01 (t, *J* = 7.2 Hz, 2H), 3.73 – 3.66 (m, 1H), 3.52 – 3.46 (m, 1H), 3.36 (m, 1H), 3.30 – 3.16 (m, 3H), 1.61 – 1.59 (m, 2H), 1.31 (m, 4H), 1.22 (m, 18H), 0.84 (t, *J* = 6.8 Hz, 3H). <sup>13</sup>C NMR (101 MHz, DMSO-*d*<sub>6</sub>) δ 164.23, 163.96, 146.71, 141.22, 133.83, 132.62, 127.57, 126.52, 122.89, 122.28, 111.59, 85.14, 78.24, 77.99, 73.52, 70.55, 61.33, 31.77, 29.48, 29.18, 27.98, 27.01, 22.58, 14.45. HRMS (ESI, m/z): [M+H]<sup>+</sup> calcd. for C<sub>32</sub>H<sub>47</sub>N<sub>2</sub>O<sub>7</sub>: 571.3383; found: 571.3414.

**5-N-glucosyl-2-hexadecyl-1H-benzo[de]isoquinoline-1,3(2H)-dione 5f:** Amorphous yellow solid; yield: 89% (0.532 g); mp: 126-128 °C. IR (KBr, cm<sup>-1</sup>): 3324, 2921, 2849, 1694, 1654 <sup>1</sup>H NMR (400 MHz, DMSO-*d*<sub>6</sub>) δ 8.13 (d, *J* = 7.6 Hz, 1H), 8.10 (s, 1H), 8.08 (d, *J* = 2.0 Hz, 1H), 7.66 (t, *J* = 8.0 Hz, 1H), 7.44 (d, *J* = 2.0 Hz, 1H), 7.20 (d, *J* = 7.6 Hz, 1H), 5.03 (d, *J* = 4.8 Hz, 1H), 4.96 (dd, *J* = 10.8, 5.2 Hz, 2H), 4.58 (t, *J* = 8.0 Hz, 1H), 4.46 (t, *J* = 6.0 Hz, 1H), 4.01 (t, *J* = 7.2 Hz, 2H), 3.73 – 3.67 (m, 1H), 3.52 – 3.46 (m, 1H), 3.36 (m, 1H), 3.29 – 3.15 (m, 3H), 1.64 – 1.57 (m, 2H), 1.31 (m, 4H), 1.22 (m, 22H), 0.84 (t, *J* = 6.8 Hz, 3H). <sup>13</sup>C NMR (101 MHz, DMSO-*d*<sub>6</sub>) δ 164.18, 163.96, 146.70, 133.83, 132.63, 127.57, 126.52, 122.88, 122.28, 122.22, 121.74, 111.60, 85.15, 78.23, 77.99, 73.52, 70.56, 61.34, 31.77, 29.48, 29.38, 29.18, 27.98, 27.02, 22.57, 14.44. HRMS (ESI, m/z): [M+H]<sup>+</sup> calcd. for C<sub>34</sub>H<sub>51</sub>N<sub>2</sub>O<sub>7</sub>: 599.3696; found: 599.3720.

**5-N-glucosyl-2-octadecyl-1H-benzo[de]isoquinoline-1,3(2H)-dione 5g:** Amorphous yellow solid; yield: 88% (0.550 g); mp: 139-141 °C. IR (KBr, cm<sup>-1</sup>): 3323, 2921, 2849, 1691, 1654. <sup>1</sup>H NMR (400 MHz, DMSO-*d*<sub>6</sub>) δ 8.13 (d, *J* = 7.2 Hz, 1H), 8.10 (s, 1H), 8.09 (d, *J* = 3.2 Hz, 1H), 7.66 (t, *J* = 8.0 Hz, 1H), 7.44 (d, *J* = 2.0 Hz, 1H), 7.20 (d, *J* = 7.2 Hz, 1H), 5.03 (d, *J* = 4.4 Hz, 1H), 4.96 (dd, *J* = 10.4, 5.2 Hz, 2H), 4.58 (t, *J* = 8.0

Hz, 1H), 4.46 (t,  $J = 5.6$  Hz, 1H), 4.01 (t,  $J = 7.2$  Hz, 2H), 3.72 – 3.67 (m, 1H), 3.52 – 3.46 (m, 1H), 3.36 (m, 1H), 3.28 – 3.16 (m, 3H), 1.63 – 1.59 (m, 2H), 1.31 (m, 4H), 1.22 (m, 26H), 0.84 (t,  $J = 6.8$  Hz, 3H).  $^{13}\text{C}$  NMR (101 MHz, DMSO- $d_6$ )  $\delta$  164.17, 163.95, 146.71, 132.61, 127.56, 126.51, 122.88, 122.29, 122.23, 121.74, 111.60, 85.16, 78.24, 77.99, 73.52, 70.56, 61.34, 31.77, 29.48, 29.19, 27.99, 27.02, 22.58, 14.43. HRMS (ESI,  $m/z$ ):  $[\text{M}+\text{H}]^+$  calcd. for  $\text{C}_{36}\text{H}_{55}\text{N}_2\text{O}_7$ : 627.4009; found: 627.4036.

**5-N-galactosyl-2-hexyl-1H-benzo[de]isoquinoline-1,3(2H)-dione 6a:** Amorphous yellow solid; yield: 94% (0.430 g); mp: 142-144 °C. IR (KBr,  $\text{cm}^{-1}$ ): 3369, 2954, 2857, 1700, 1654.  $^1\text{H}$  NMR (400 MHz, DMSO- $d_6$ )  $\delta$  8.13 (d,  $J = 7.2$  Hz, 1H), 8.10 (s, 1H), 8.09 (d,  $J = 4.4$  Hz, 1H), 7.66 (t,  $J = 7.6$  Hz, 1H), 7.45 (d,  $J = 2.0$  Hz, 1H), 7.18 (d,  $J = 7.6$  Hz, 1H), 4.81 (d,  $J = 5.2$  Hz, 2H), 4.60 – 4.52 (m, 2H), 4.45 (d,  $J = 4.0$  Hz, 1H), 4.01 (t,  $J = 7.6$  Hz, 2H), 3.78 (t,  $J = 3.6$  Hz, 1H), 3.64 – 3.53 (m, 3H), 3.50 – 3.45 (m, 2H), 1.66 – 1.56 (m, 2H), 1.31 (m, 6H), 0.86 (t,  $J = 7.2$  Hz, 3H).  $^{13}\text{C}$  NMR (101 MHz, DMSO- $d_6$ )  $\delta$  164.17, 163.96, 146.80, 133.78, 132.53, 127.56, 126.47, 122.85, 122.24, 122.19, 121.67, 111.61, 85.61, 76.23, 74.82, 70.59, 68.84, 60.95, 31.44, 27.94, 26.67, 22.47, 14.39. HRMS (ESI,  $m/z$ ):  $[\text{M}+\text{H}]^+$  calcd. for  $\text{C}_{24}\text{H}_{31}\text{N}_2\text{O}_7$ : 459.2131; found: 459.2151.

**5-N-galactosyl-2-octyl-1H-benzo[de]isoquinoline-1,3(2H)-dione 6b:** Amorphous yellow solid; yield: 87% (0.422 g); mp: 140-142 °C. IR (KBr,  $\text{cm}^{-1}$ ): 3372, 2924, 2853, 1700, 1653.  $^1\text{H}$  NMR (400 MHz, DMSO- $d_6$ )  $\delta$  8.13 (d,  $J = 6.8$  Hz, 1H), 8.10 (s, 1H), 8.09 (d,  $J = 4.0$  Hz, 1H), 7.66 (t,  $J = 8.0$  Hz, 1H), 7.45 (d,  $J = 2.0$  Hz, 1H), 7.18 (d,  $J = 8.0$  Hz, 1H), 4.81 (d,  $J = 5.2$  Hz, 2H), 4.61 – 4.52 (m, 2H), 4.45 (d,  $J = 4.0$  Hz, 1H), 4.01 (t,  $J = 7.2$  Hz, 2H), 3.78 (t,  $J = 3.6$  Hz, 1H), 3.61 – 3.55 (m, 3H), 3.51 – 3.43 (m, 2H), 1.64 – 1.57 (m, 2H), 1.31 (m, 4H), 1.24 (m, 6H), 0.85 (t,  $J = 6.8$  Hz, 3H).  $^{13}\text{C}$  NMR (101 MHz, DMSO- $d_6$ )  $\delta$  164.16, 163.95, 146.79, 133.77, 132.51, 127.52, 126.45, 122.85, 122.22, 122.19, 121.68, 111.63, 85.64, 76.23, 74.81, 70.58, 68.84, 60.95, 31.67, 29.15, 29.03, 27.95, 26.99, 22.52, 14.38. HRMS (ESI,  $m/z$ ):  $[\text{M}+\text{H}]^+$  calcd. for  $\text{C}_{26}\text{H}_{35}\text{N}_2\text{O}_7$ : 487.2444; found: 487.2469.

**5-N-galactosyl-2-decyl-1H-benzo[de]isoquinoline-1,3(2H)-dione 6c:** Amorphous yellow solid; yield: 90% (0.462 g); mp: 168-170 °C. IR (KBr,  $\text{cm}^{-1}$ ): 3382, 2922, 2850, 1703, 1651.  $^1\text{H}$  NMR (400 MHz, DMSO- $d_6$ )  $\delta$  8.16 – 8.07 (m, 3H), 7.66 (t,  $J = 7.8$  Hz,

1H), 7.45 (s, 1H), 7.17 (d,  $J = 7.4$  Hz, 1H), 4.82 (d,  $J = 5.2$  Hz, 2H), 4.61-4.53 (m, 2H), 4.46 (d,  $J = 4.0$  Hz, 1H), 4.01 (t,  $J = 7.2$  Hz, 2H), 3.78 (s, 1H), 3.63 – 3.48 (m, 5H), 1.61 (d,  $J = 0.8$  Hz, 2H), 1.31 (s, 4H), 1.23 (s, 10H), 0.83 (t,  $J = 6.8$  Hz, 3H).  $^{13}\text{C}$  NMR (101 MHz, DMSO- $d_6$ )  $\delta$  164.16, 163.95, 146.80, 133.77, 132.50, 127.52, 126.44, 122.85, 122.23, 122.19, 121.68, 111.63, 85.65, 76.23, 74.82, 70.59, 68.83, 60.94, 31.73, 29.38, 29.36, 29.19, 29.12, 27.95, 26.98, 22.54, 14.40. HRMS (ESI,  $m/z$ ):  $[\text{M}+\text{H}]^+$  calcd. for  $\text{C}_{28}\text{H}_{39}\text{N}_2\text{O}_7$ : 515.2757; found: 515.2774.

**5-N-galactosyl-2-dodecyl-1H-benzo[de]isoquinoline-1,3(2H)-dione 6d:** Amorphous yellow solid; yield: 88% (0.476 g); mp: 141-143 °C. IR (KBr,  $\text{cm}^{-1}$ ): 3386, 2922, 2851, 1701, 1653.  $^1\text{H}$  NMR (400 MHz, DMSO- $d_6$ )  $\delta$  8.13 (d,  $J = 7.2$  Hz, 1H), 8.10 (s, 1H), 8.09 (d,  $J = 4.4$  Hz, 1H), 7.66 (t,  $J = 8.0$  Hz, 1H), 7.45 (d,  $J = 2.0$  Hz, 1H), 7.18 (d,  $J = 7.6$  Hz, 1H), 4.81 (d,  $J = 5.6$  Hz, 2H), 4.60 – 4.52 (m, 2H), 4.45 (d,  $J = 4.0$  Hz, 1H), 4.01 (t,  $J = 7.2$  Hz, 2H), 3.78 (t,  $J = 3.6$  Hz, 1H), 3.63 – 3.54 (m, 3H), 3.51 – 3.44 (m, 2H), 1.64 – 1.57 (m, 2H), 1.31 (m, 4H), 1.22 (m, 14H), 0.84 (t,  $J = 6.8$  Hz, 3H).  $^{13}\text{C}$  NMR (101 MHz, DMSO- $d_6$ )  $\delta$  164.15, 163.94, 146.80, 133.78, 132.51, 127.52, 126.43, 122.84, 122.24, 122.19, 121.68, 111.59, 85.63, 76.23, 74.83, 70.59, 68.82, 60.93, 31.77, 29.48, 29.40, 29.23, 29.19, 27.98, 27.02, 22.58, 14.43. HRMS (ESI,  $m/z$ ):  $[\text{M}+\text{H}]^+$  calcd. for  $\text{C}_{30}\text{H}_{43}\text{N}_2\text{O}_7$ : 543.3070; found: 543.3089

**5-N-galactosyl-2-tetradecyl-1H-benzo[de]isoquinoline-1,3(2H)-dione 6e:** Amorphous yellow solid; yield: 87% (0.495 g); mp: 133-135 °C. IR (KBr,  $\text{cm}^{-1}$ ): 3389, 2922, 2851, 1702, 1651.  $^1\text{H}$  NMR (400 MHz, DMSO- $d_6$ ) 8.13 (d,  $J = 7.2$  Hz, 1H), 8.10 (s, 1H), 8.09 (d,  $J = 4.4$  Hz, 1H), 7.66 (t,  $J = 8.0$  Hz, 1H), 7.45 (d,  $J = 2.4$  Hz, 1H), 7.18 (d,  $J = 7.6$  Hz, 1H), 4.81 (d,  $J = 5.2$  Hz, 2H), 4.60 – 4.52 (m, 2H), 4.44 (d,  $J = 4.4$  Hz, 1H), 4.01 (t,  $J = 7.6$  Hz, 2H), 3.78 (t,  $J = 3.6$  Hz, 1H), 3.63 – 3.54 (m, 3H), 3.50 – 3.44 (m, 2H), 1.65 – 1.57 (m, 2H), 1.31 (m, 4H), 1.22 (m, 18H), 0.84 (t,  $J = 7.2$  Hz, 3H).  $^{13}\text{C}$  NMR (101 MHz, DMSO- $d_6$ )  $\delta$  164.16, 163.95, 146.81, 133.79, 132.52, 127.53, 126.44, 122.86, 122.24, 122.20, 121.69, 111.60, 85.64, 76.23, 74.83, 70.58, 68.82, 60.93, 31.77, 29.49, 29.39, 29.22, 29.19, 27.98, 27.02, 22.58, 14.43. HRMS (ESI,  $m/z$ ):  $[\text{M}+\text{H}]^+$  calcd. for  $\text{C}_{32}\text{H}_{47}\text{N}_2\text{O}_7$ : 571.3383; found: 571.3406.

**5-N-galactosyl-2-hexadecyl-1H-benzo[de]isoquinoline-1,3(2H)-dione 6f:** Amorphous yellow solid; yield: 89% (0.532 g); mp: 131-133 °C. IR (KBr,  $\text{cm}^{-1}$ ): 3388,

2920, 2849, 1702, 1654.  $^1\text{H}$  NMR (400 MHz,  $\text{DMSO-}d_6$ )  $\delta$  8.13 (d,  $J = 7.2$  Hz, 1H), ), 8.10 (s, 1H), 8.09 (d,  $J = 4.4$  Hz, 1H), 7.66 (t,  $J = 7.6$  Hz, 1H), 7.44 (d,  $J = 1.6$  Hz, 1H), 7.18 (d,  $J = 7.6$  Hz, 1H), 4.80 (d,  $J = 5.6$  Hz, 2H), 4.59 – 4.53 (m, 2H), 4.44 (d,  $J = 4.0$  Hz, 1H), 4.01 (t,  $J = 7.2$  Hz, 2H), 3.78 (t,  $J = 3.6$  Hz, 1H), 3.59 – 3.54 (m, 3H), 3.50 – 3.43 (m, 2H), 1.65 – 1.57 (m, 2H), 1.30 (m, 4H), 1.22 (m, 22H), 0.84 (t,  $J = 7.2$  Hz, 3H).  $^{13}\text{C}$  NMR (101 MHz,  $\text{DMSO-}d_6$ )  $\delta$  164.14, 163.94, 146.79, 133.77, 132.51, 127.51, 126.43, 122.83, 122.18, 121.68, 111.60, 85.63, 76.21, 74.82, 70.58, 68.81, 60.92, 31.77, 29.49, 29.39, 29.22, 29.19, 27.98, 27.03, 22.58, 14.42. HRMS (ESI,  $m/z$ ):  $[\text{M}+\text{H}]^+$  calcd. for  $\text{C}_{34}\text{H}_{51}\text{N}_2\text{O}_7$ : 599.3696; found: 599.3715.

**5-N-galactosyl-2-octadecyl-1H-benzo[de]isoquinoline-1,3(2H)-dione** **6g**:

Amorphous yellow solid; yield: 86% (0.538 g); mp: 140-142 °C. IR (KBr,  $\text{cm}^{-1}$ ): 3388, 2922, 2850, 1702, 1651.  $^1\text{H}$  NMR (400 MHz,  $\text{DMSO-}d_6$ )  $\delta$  8.13 (d,  $J = 7.2$  Hz, 1H), ), 8.10 (s, 1H), 8.09 (d,  $J = 4.4$  Hz, 1H), 7.66 (t,  $J = 8.0$  Hz, 1H), 7.44 (d,  $J = 2.0$  Hz, 1H), 7.18 (d,  $J = 7.6$  Hz, 1H), 4.80 (d,  $J = 5.2$  Hz, 2H), 4.60 – 4.51 (m, 2H), 4.44 (d,  $J = 4.4$  Hz, 1H), 4.01 (t,  $J = 7.6$  Hz, 2H), 3.78 (t,  $J = 3.6$  Hz, 1H), 3.61 – 3.54 (m, 3H), 3.50 – 3.43 (m, 2H), 1.64 – 1.57 (m, 2H), 1.31 (m, 4H), 1.22 (m, 26H), 0.84 (t,  $J = 7.2$  Hz, 3H).  $^{13}\text{C}$  NMR (101 MHz,  $\text{DMSO-}d_6$ )  $\delta$  164.14, 163.94, 146.80, 133.78, 132.51, 127.51, 126.43, 122.84, 122.24, 122.19, 121.68, 111.60, 85.64, 76.22, 74.82, 70.58, 68.81, 60.92, 31.78, 29.49, 29.40, 29.23, 29.19, 27.99, 27.03, 22.58, 14.42. HRMS (ESI,  $m/z$ ):  $[\text{M}+\text{H}]^+$  calcd. for  $\text{C}_{36}\text{H}_{55}\text{N}_2\text{O}_7$ : 627.4009; found: 627.4036

**5-N-xylosyl-2-hexyl-1H-benzo[de]isoquinoline-1,3(2H)-dione** **7a**:

Amorphous yellow solid; yield: 93% (0.398 g); mp: 183-185 °C. IR (KBr,  $\text{cm}^{-1}$ ): 3431, 3329, 2929, 2855, 1703, 1651.  $^1\text{H}$  NMR (400 MHz,  $\text{DMSO-}d_6$ )  $\delta$  8.15 (d,  $J = 2.4$  Hz, 1H), 8.13 (s, 1H), 8.07 (d,  $J = 2.4$  Hz, 1H), 7.67 (t,  $J = 8.0$  Hz, 1H), 7.44 (d,  $J = 2.0$  Hz, 1H), 7.19 (d,  $J = 8.0$  Hz, 1H), 5.08 (d,  $J = 4.0$  Hz, 1H), 5.01 (t,  $J = 4.8$  Hz, 2H), 4.56 (t,  $J = 8.0$  Hz, 1H), 4.01 (t,  $J = 7.6$ , 2H), 3.73 (dd,  $J = 10.0, 4.4$  Hz, 1H), 3.42 – 3.34 (m, 1H), 3.30 – 3.21 (m, 3H), 1.66 – 1.56 (m, 2H), 1.32 (m, 6H), 0.86 (t,  $J = 6.8$  Hz, 3H).  $^{13}\text{C}$  NMR (101 MHz,  $\text{DMSO-}d_6$ )  $\delta$  164.11, 163.91, 146.50, 133.73, 132.55, 127.56, 126.55, 122.90, 122.19, 122.10, 121.74, 111.50, 85.72, 78.16, 73.39, 70.31, 67.04, 31.45, 27.94, 26.68, 22.47, 14.39. HRMS (ESI,  $m/z$ ):  $[\text{M}+\text{H}]^+$  calcd. for  $\text{C}_{23}\text{H}_{29}\text{N}_2\text{O}_6$ : 429.2026; found: 429.2041.



**5-N-xylosyl-2-octyl-1H-benzo[de]isoquinoline-1,3(2H)-dione 7b:** Amorphous yellow solid; yield: 91% (0.414 g); mp: 182-184 °C. IR (KBr,  $\text{cm}^{-1}$ ): 3427, 3328, 2925, 2852, 1703, 1651.  $^1\text{H}$  NMR (400 MHz,  $\text{DMSO-}d_6$ )  $\delta$  8.15 (d,  $J = 2.4$  Hz, 1H), 8.13 (d,  $J = 1.2$  Hz, 1H), 8.07 (d,  $J = 2.4$  Hz, 1H), 7.67 (t,  $J = 8.0$  Hz, 1H), 7.44 (d,  $J = 2.4$  Hz, 1H), 7.19 (d,  $J = 8.0$  Hz, 1H), 5.08 (d,  $J = 4.4$  Hz, 1H), 5.01 (t,  $J = 4.8$  Hz, 2H), 4.56 (t,  $J = 8.0$  Hz, 1H), 4.01 (t,  $J = 7.6$ , 2H), 3.73 (dd,  $J = 10.0, 4.4$  Hz, 1H), 3.41 – 3.34 (m, 1H), 3.30–3.20 (m, 3H), 1.66 – 1.55 (m, 2H), 1.30 (m, 4H), 1.25 (m, 6H), 0.85 (t,  $J = 6.8$  Hz, 3H).  $^{13}\text{C}$  NMR (101 MHz,  $\text{DMSO-}d_6$ )  $\delta$  164.09, 163.87, 146.27, 133.63, 132.27, 127.16, 126.53, 122.94, 122.26, 122.12, 121.99, 111.57, 86.00, 79.37, 79.05, 78.72, 77.91, 73.18, 70.22, 66.93, 31.76, 29.28, 29.14, 28.08, 27.12, 22.59, 14.34. HRMS (ESI,  $m/z$ ):  $[\text{M}+\text{H}]^+$  calcd. for  $\text{C}_{25}\text{H}_{33}\text{N}_2\text{O}_6$ : 457.2339; found: 457.2362.

**5-N-xylosyl-2-decyl-1H-benzo[de]isoquinoline-1,3(2H)-dione 7c:** Amorphous yellow solid; yield: 94% (0.454 g); mp: 175-177 °C. IR (KBr,  $\text{cm}^{-1}$ ): 3427, 3335, 2923, 2852, 1703, 1650.  $^1\text{H}$  NMR (400 MHz,  $\text{DMSO-}d_6$ )  $\delta$  8.15 (d,  $J = 2.8$  Hz, 1H), 8.13 (d,  $J = 1.6$  Hz, 1H), 8.07 (d,  $J = 2.4$  Hz, 1H), 7.67 (t,  $J = 8.0$  Hz, 1H), 7.44 (d,  $J = 2.0$  Hz, 1H), 7.19 (d,  $J = 8.0$  Hz, 1H), 5.08 (d,  $J = 4.0$  Hz, 1H), 5.01 (t,  $J = 5.2$  Hz, 2H), 4.55 (t,  $J = 8.0$  Hz, 1H), 4.01 (t,  $J = 7.6$  Hz, 2H), 3.73 (dd,  $J = 10.4, 4.4$  Hz, 1H), 3.39 – 3.34 (m, 1H), 3.30 – 3.21 (m, 3H), 1.62 (m, 2H), 1.31 (m, 4H), 1.23 (m, 10H), 0.84 (t,  $J = 6.8$  Hz, 3H).  $^{13}\text{C}$  NMR (101 MHz,  $\text{DMSO-}d_6$ )  $\delta$  164.12, 163.92, 146.51, 133.75, 132.55, 127.55, 126.54, 122.92, 122.20, 122.10, 121.76, 111.50, 85.73, 78.16, 73.39, 70.31, 67.04, 31.75, 29.40, 29.22, 29.15, 27.97, 27.01, 22.57, 14.42. HRMS (ESI,  $m/z$ ):  $[\text{M}+\text{H}]^+$  calcd. for  $\text{C}_{27}\text{H}_{37}\text{N}_2\text{O}_6$ : 485.2652; found: 485.2669

**5-N-xylosyl-2-dodecyl-1H-benzo[de]isoquinoline-1,3(2H)-dione 7d:** Amorphous yellow solid; yield: 89% (0.455 g); mp: 177-179°C. IR (KBr,  $\text{cm}^{-1}$ ): 3426, 3329, 2921, 2851, 1704, 1651.  $^1\text{H}$  NMR (400 MHz, ,  $\text{DMSO-}d_6$ )  $\delta$  8.15 (d,  $J = 2.4$  Hz, 1H), 8.13 (d,  $J = 1.2$  Hz, 1H), 8.06 (d,  $J = 2.4$  Hz, 1H), 7.67 (t,  $J = 7.6$  Hz, 1H), 7.44 (d,  $J = 2.0$  Hz, 1H), 7.19 (d,  $J = 8.0$  Hz, 1H), 5.07 (d,  $J = 4.0$  Hz, 1H), 5.01 (t,  $J = 5.6$  Hz, 2H), 4.55 (t,  $J = 8.0$  Hz, 1H), 4.04 – 3.97 (m, 2H), 3.73 (dd,  $J = 10.4, 4.4$  Hz, 1H), 3.40 – 3.34 (m, 1H), 3.30 – 3.22 (m, 3H), 1.66 – 1.55 (m, 2H), 1.31 (m, 4H), 1.22 (m, 14H), 0.84 (t,  $J = 6.8$  Hz, 3H).  $^{13}\text{C}$  NMR (101 MHz,  $\text{DMSO-}d_6$ )  $\delta$  164.15, 163.94, 146.54, 146.09, 133.77, 132.57, 127.58, 126.55, 122.95, 122.24, 122.11, 121.78, 111.52, 85.73, 78.16, 73.39,

70.31, 67.05, 31.77, 29.47, 29.38, 29.22, 29.18, 27.97, 27.00, 22.57, 14.43. HRMS (ESI, m/z): [M+H]<sup>+</sup> calcd. for C<sub>29</sub>H<sub>41</sub>N<sub>2</sub>O<sub>6</sub>: 513.2965; found: 513.2984.

**5-N-xylosyl-2-tetradecyl-1H-benzo[de]isoquinoline-1,3(2H)-dione 7e:** Amorphous yellow solid; yield: 91% (0.491 g); mp: 159-161 °C. IR (KBr, cm<sup>-1</sup>): 3426, 3333, 2920, 2850, 1704, 1650. <sup>1</sup>H NMR (400 MHz, DMSO-*d*<sub>6</sub>) δ 8.15 (d, *J* = 2.4 Hz, 1H), 8.13 (s, 1H), 8.06 (d, *J* = 2.0 Hz, 1H), 7.66 (t, *J* = 8.0 Hz, 1H), 7.44 (d, *J* = 2.0 Hz, 1H), 7.18 (d, *J* = 8.0 Hz, 1H), 5.07 (d, *J* = 4.0 Hz, 1H), 5.01 (t, *J* = 6.0 Hz, 2H), 4.55 (t, *J* = 7.6 Hz, 1H), 4.05 – 3.96 (m, 2H), 3.73 (dd, *J* = 10.0, 4.4 Hz, 1H), 3.41 – 3.34 (m, 1H), 3.29 – 3.21 (m, 3H), 1.66 – 1.57 (m, 2H), 1.30 (m, 4H), 1.22 (m, 18H), 0.84 (t, *J* = 7.2 Hz, 3H). <sup>13</sup>C NMR (101 MHz, DMSO-*d*<sub>6</sub>) δ 164.16, 163.95, 162.74, 146.54, 133.78, 132.58, 127.59, 126.57, 122.96, 122.24, 122.11, 121.78, 111.53, 85.72, 78.15, 73.39, 70.31, 67.04, 31.77, 29.48, 29.36, 29.18, 27.96, 27.00, 22.57, 14.43, 0.59. HRMS (ESI, m/z): [M+H]<sup>+</sup> calcd. for C<sub>31</sub>H<sub>45</sub>N<sub>2</sub>O<sub>6</sub>: 541.3275; found: 541.3299.

**5-N-xylosyl-2-hexadecyl-1H-benzo[de]isoquinoline-1,3(2H)-dione 7f:** Amorphous yellow solid; yield: 86% (0.488 g); mp: 158-160 °C. IR (KBr, cm<sup>-1</sup>): 3426, 3332, 2920, 2850, 1704, 1651. <sup>1</sup>H NMR (400 MHz, , DMSO-*d*<sub>6</sub>) δ 8.15 (d, *J* = 2.4 Hz, 1H), 8.13 (s, 1H), 8.06 (d, *J* = 2.0 Hz, 1H), 7.66 (t, *J* = 8.0 Hz, 1H), 7.44 (d, *J* = 2.4 Hz, 1H), 7.18 (d, *J* = 8.0 Hz, 1H), 5.08 (d, *J* = 4.0 Hz, 1H), 5.01 (t, *J* = 5.6 Hz, 2H), 4.55 (t, *J* = 8.0 Hz, 1H), 4.04 – 3.97 (m, 2H), 3.73 (dd, *J* = 10.4, 4.4 Hz, 1H), 3.37 – 3.34 (m, 1H), 3.29 – 3.22 (m, 3H), 1.65 – 1.56 (m, 2H), 1.30 (m, 4H), 1.22 (m, 22H), 0.84 (t, *J* = 6.8 Hz, 3H). <sup>13</sup>C NMR (101 MHz, DMSO-*d*<sub>6</sub>) δ 164.16, 163.95, 146.53, 133.78, 132.58, 127.60, 122.96, 122.24, 122.11, 121.77, 111.52, 85.71, 78.14, 73.38, 70.30, 67.03, 31.77, 29.47, 29.35, 29.18, 27.96, 26.99, 22.57, 14.43. HRMS (ESI, m/z): [M+H]<sup>+</sup> calcd. for C<sub>33</sub>H<sub>49</sub>N<sub>2</sub>O<sub>6</sub>: 569.3591; found: 569.3610.

**5-N-xylosyl-2-octadecyl-1H-benzo[de]isoquinoline-1,3(2H)-dione 7g:** Amorphous yellow solid; yield: 88% (0.524 g); mp: 153-155 °C. IR (KBr, cm<sup>-1</sup>): 3427, 3329, 2920, 2850, 1704, 1651. <sup>1</sup>H NMR (400 MHz, DMSO-*d*<sub>6</sub>) δ 8.15 (d, *J* = 2.4 Hz, 1H), 8.13 (s, 1H), 8.06 (d, *J* = 2.0 Hz, 1H), 7.66 (t, *J* = 7.6 Hz, 1H), 7.44 (d, *J* = 2.0 Hz, 1H), 7.18 (d, *J* = 8.0 Hz, 1H), 5.07 (d, *J* = 4.0 Hz, 1H), 5.01 (t, *J* = 6.0 Hz, 2H), 4.55 (t, *J* = 8.0 Hz, 1H), 4.04 – 3.97 (m, 2H), 3.73 (dd, *J* = 10.4, 4.4 Hz, 1H), 3.41 – 3.34 (m, 1H), 3.30 – 3.20 (m, 3H), 1.64 – 1.56 (m, 2H), 1.30 (m, 4H), 1.22 (m, 26H), 0.84 (t, *J* = 7.2 Hz, 3H).

$^{13}\text{C}$  NMR (101 MHz, DMSO- $d_6$ )  $\delta$  163.95, 146.53, 133.78, 132.59, 127.60, 126.57, 122.96, 122.23, 122.11, 121.77, 111.52, 85.71, 78.14, 73.38, 70.30, 67.03, 31.77, 29.47, 29.35, 29.18, 27.96, 26.99, 22.57, 14.43. HRMS (ESI, m/z):  $[\text{M}+\text{H}]^+$  calcd. for  $\text{C}_{35}\text{H}_{52}\text{N}_2\text{O}_6$ : 597.3904; found: 597.3910.

**Reference S1:** S. Kotowicz, M. Korzec, M. Siwy, S. Golba, J. G. Malecki, H. Janeczek, S. Mackowski, K. Bednarczyk, M. Libera and E. Schab-Balcerzak, *Dye. Pigment.*, **2018**, *158*, 65–78.

| <b>Table S1. Synthesis of sugar-based naphthalimides</b> |                                                                                     |                                                                                                                                                                                                                                                                                                |                                                                                                                                                                                                                                                                                    |
|----------------------------------------------------------|-------------------------------------------------------------------------------------|------------------------------------------------------------------------------------------------------------------------------------------------------------------------------------------------------------------------------------------------------------------------------------------------|------------------------------------------------------------------------------------------------------------------------------------------------------------------------------------------------------------------------------------------------------------------------------------|
| <b>S. No.</b>                                            | <b>Structure</b>                                                                    | <b>Summary of the methodology</b>                                                                                                                                                                                                                                                              | <b>Summary of application</b>                                                                                                                                                                                                                                                      |
| 1                                                        | 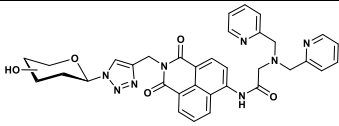   | <ol style="list-style-type: none"> <li>1. Only two derivatives were reported</li> <li>2. Involves protection and deprotection of saccharide –OH groups</li> <li>3. Multi-step synthesis</li> <li>4. Involves column chromatography purification</li> <li>5. Overall yield: Moderate</li> </ol> | Li and co-workers: Enhanced aqueous sensitivity and lowered cytotoxicity of naphthalimide-based zinc ion fluorescence probe. <sup>S2</sup>                                                                                                                                         |
| 2                                                        |    | <ol style="list-style-type: none"> <li>1. Limited substrate scope</li> <li>2. Involves protection and deprotection of saccharide –OH groups</li> <li>3. Multi-step synthesis</li> <li>4. Involves column chromatography purification</li> <li>5. Overall yield: Moderate to poor</li> </ol>    | Robinson and co-workers: Synthesis of amphiphilic sugar naphthalimide derivatives. <sup>S3</sup><br>Tian and co-workers: Photochromic fluorescent glycoprobes. <sup>S7</sup><br>Zhang and co-workers: Fluorescent probe for intracellular imaging of hexosaminidase. <sup>S8</sup> |
| 3                                                        |  | <ol style="list-style-type: none"> <li>1. Only two derivatives were reported</li> <li>2. Multi-step synthesis</li> <li>3. Involves column chromatography purification</li> </ol> <p>Overall yield: Poor</p>                                                                                    | Yi and co-workers: Hydrogels as a hydrophilic drug delivery system. <sup>S4</sup><br>Yu and co-workers: construction of a Eu <sup>3+</sup> -based metallogel <i>via</i> energy transfer in a supramolecular scaffold. <sup>S5</sup>                                                |
| 4                                                        |  | <ol style="list-style-type: none"> <li>1. Involves protection and deprotection of saccharide –OH groups</li> <li>2. Multi-step synthesis</li> <li>3. Involves column chromatography purification</li> </ol> <p>Overall yield: Poor</p>                                                         | Scanlan and co-workers: Fluorescent probes for tumor cell imaging. <sup>S6,S9</sup>                                                                                                                                                                                                |

|   |                                                                                   |                                                                                                                                                                                                                                                                                                                                                                                                                                                 |                                                                                                                                                       |
|---|-----------------------------------------------------------------------------------|-------------------------------------------------------------------------------------------------------------------------------------------------------------------------------------------------------------------------------------------------------------------------------------------------------------------------------------------------------------------------------------------------------------------------------------------------|-------------------------------------------------------------------------------------------------------------------------------------------------------|
| 5 | 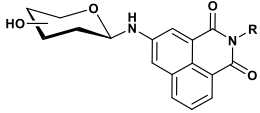 | <p>Key features of present work:</p> <ol style="list-style-type: none"> <li>1. only 2 step reaction</li> <li>2. selective <math>\beta</math>-anomeric product</li> <li>3. broad substrate scope (21 derivatives)</li> <li>3. Overall yield: excellent</li> <li>4. No column chromatographic purification</li> <li>5. Environmental friendly reaction condition</li> <li>6. only 2 H<sub>2</sub>O and O<sub>2</sub> as a side product</li> </ol> | <p><b>Present work:</b> A facile synthesis of amphiphilic N-glycosyl naphthalimides and fabrication of flexible semiconductor using self-assembly</p> |
|---|-----------------------------------------------------------------------------------|-------------------------------------------------------------------------------------------------------------------------------------------------------------------------------------------------------------------------------------------------------------------------------------------------------------------------------------------------------------------------------------------------------------------------------------------------|-------------------------------------------------------------------------------------------------------------------------------------------------------|

#### References

- S2. L. Dong, Y. Zang, D. Zhou, X. P. He, G. R. Chen, T. D. James and J. Li, *Chem. Commun.*, 2015, 51, 11852–11855.
- S3 G. Cavigiolio, J. L. Morgan, B. H. Robinson and J. Simpson, in *Australian Journal of Chemistry*, 2004, vol. 57, pp. 885–894.
- S4 Z. Ma, P. Zhang, X. Yu, H. Lan, Y. Li, D. Xie, J. Li and T. Yi, *J. Mater. Chem. B*, 2015, 3, 7366–7371.
- S5 T. Wang, Z. Wang, D. Xie, C. Wang, X. Zhen, Y. Li and X. Yu, *RSC Adv.*, 2015, 5, 107694–107699.
- S6 E. Calatrava-Pérez, S. Acherman, L. Stricker, G. McManus, J. Delente, A. D. Lynes, A. F. Henwood, J. I. Lovitt, C. S. Hawes, K. Byrne, W. Schmitt, O. Kotova, T. Gunnlaugsson and E. M. Scanlan, *Org. Biomol. Chem.*, 2020, 18, 3475–3480.
- S7 E. Calatrava-Pérez, S. A. Bright, S. Achermann, C. Moylan, M. O. Senge, E. B. Veale, D. C. Williams, T. Gunnlaugsson and E. M. Scanlan, *Chem. Commun.*, 2016, 52, 13086–13089.
- S8 L. Dong, S. Shen, H. Lu, S. Jin and J. Zhang, *ACS Sensors*, 2019, 4, 1222–1229.
- S9 J. Zhang, Y. Fu, H.-H. Han, Y. Zang, J. Li, X.-P. He, B. L. Feringa and H. Tian, *Nat. Commun.*, 2017, 8, 987.



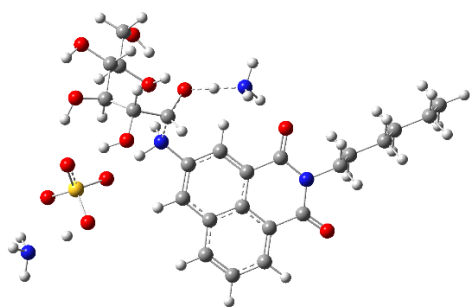

**TS1**

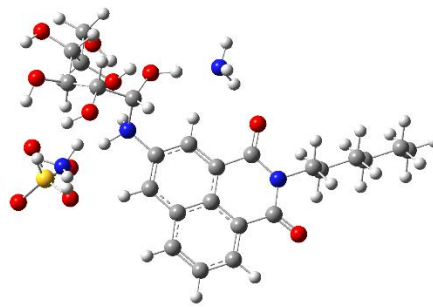

**IM1**

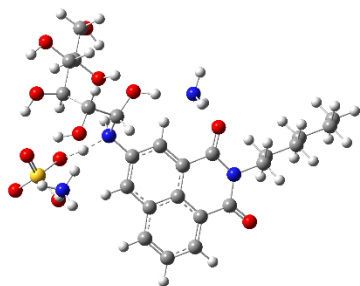

**TS2**

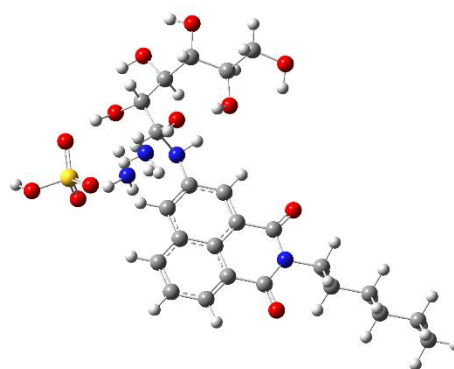

**IM2**

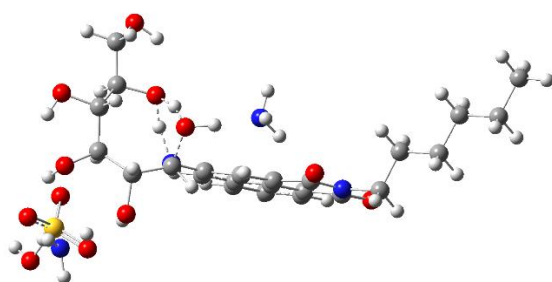

**TS3**

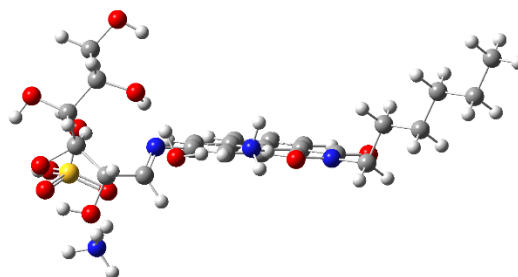

**IM3**

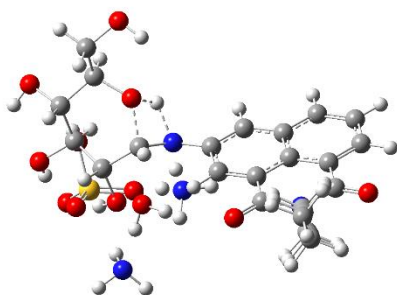

**TS4**

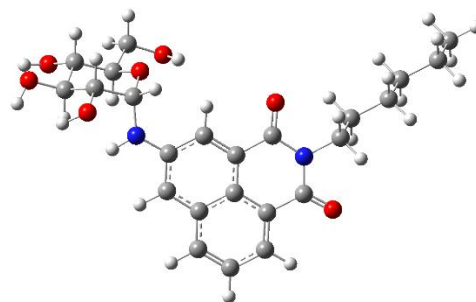

**a-PC**

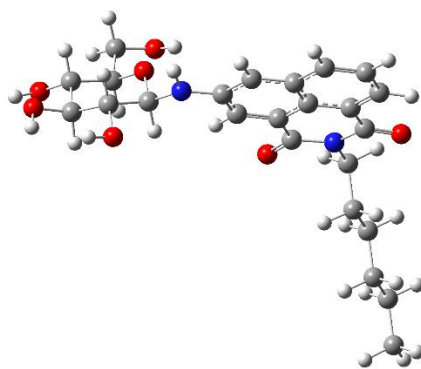

**e-PC**

**Figure S1.** Images of the optimized geometries of the TSs, IM and products obtained in the reaction between D-glucose and N-alkyl-3-aminonaphthlimide in the presence of ammonium sulphate. TS, transition state; IM, intermediate; a-PC, axillary product( $\alpha$ -anomeric product); e-PC, equatorial product( $\beta$ -anomeric product).



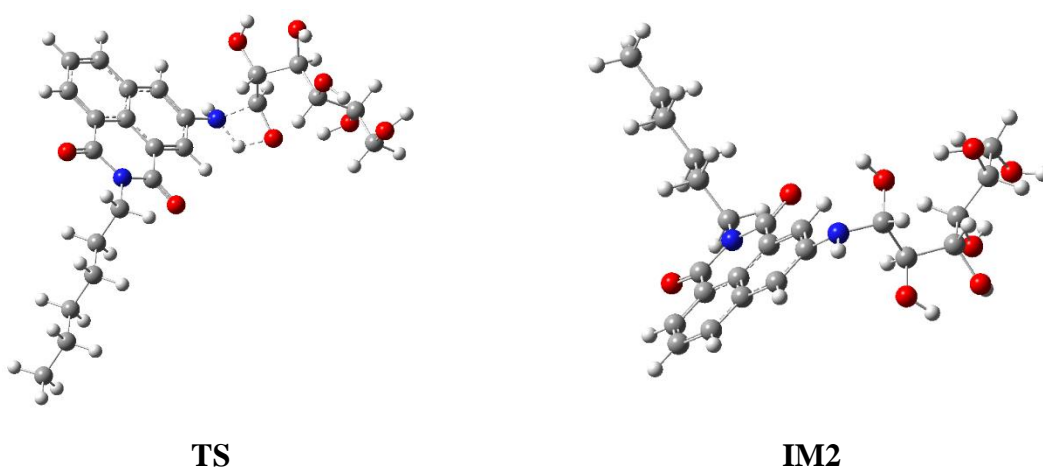

**Figure S2.** Images of the optimized geometries of the TS and IM2 obtained in the reaction between D-glucose and N-alkyl-3-aminonaphthlimide in the absence of ammonium sulphate. TS, transition state; IM, intermediate.

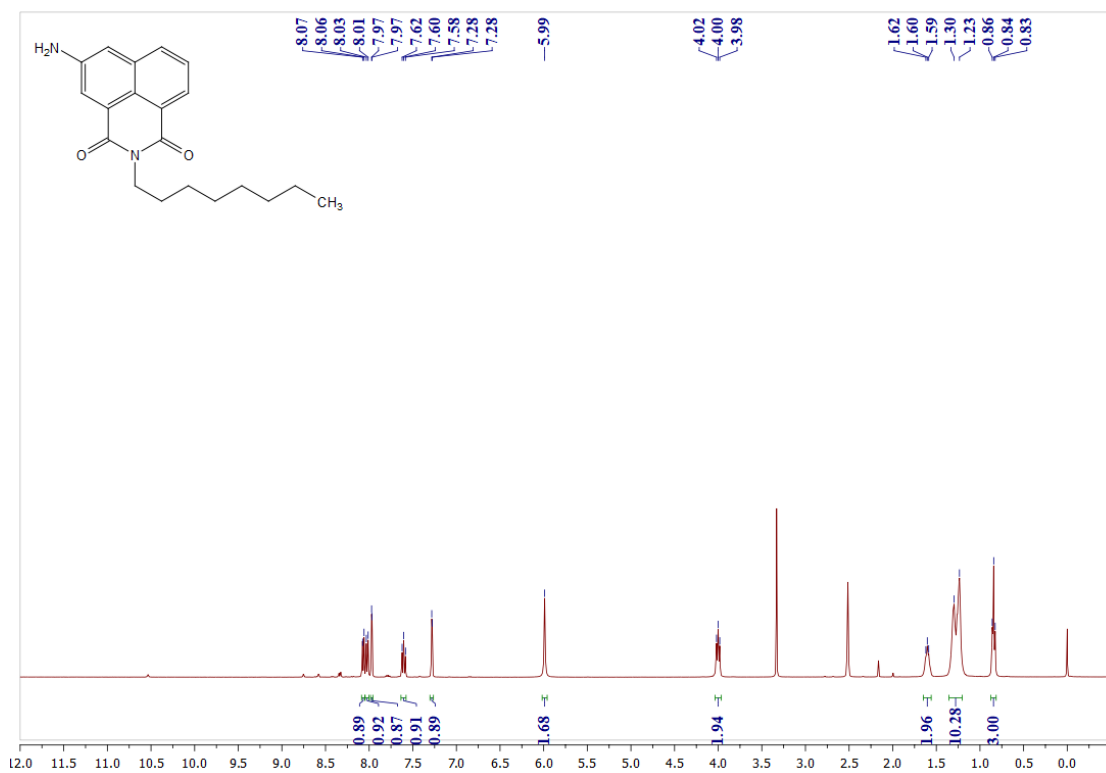

Figure S3. <sup>1</sup>H NMR Spectrum of compound 3b (400 MHz, DMSO-*d*<sub>6</sub>)

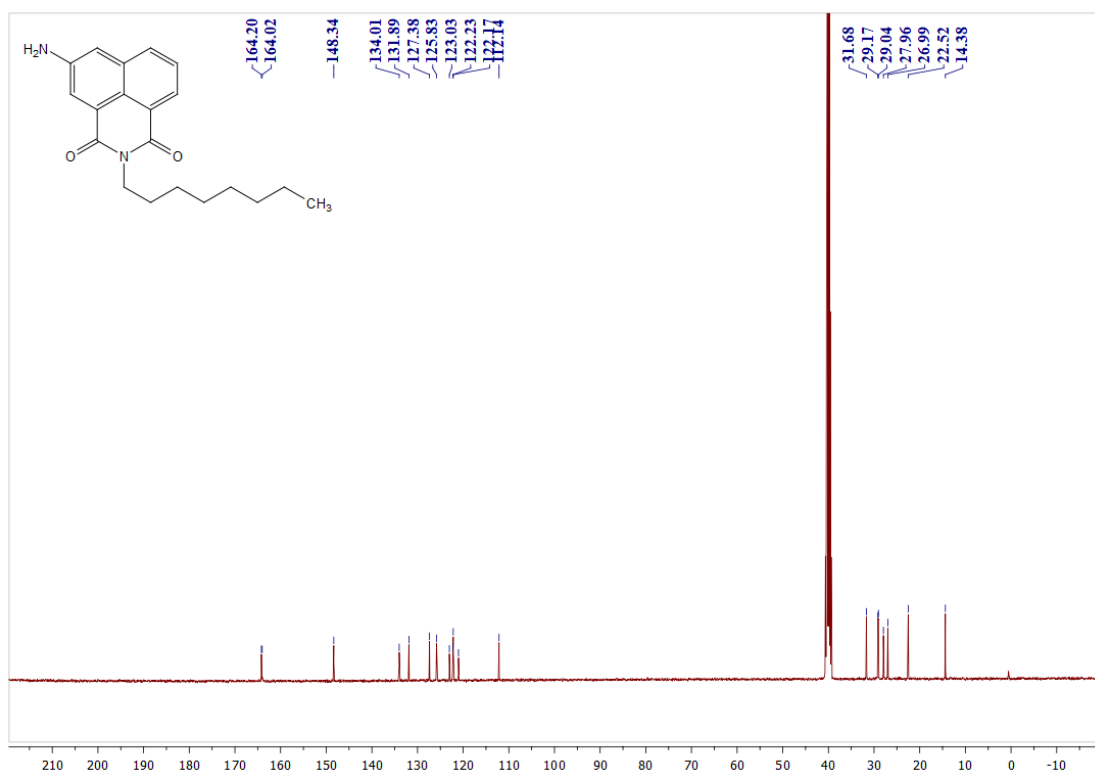

Figure S4. <sup>13</sup>C NMR Spectrum of compound 3b (101 MHz, DMSO-*d*<sub>6</sub>)

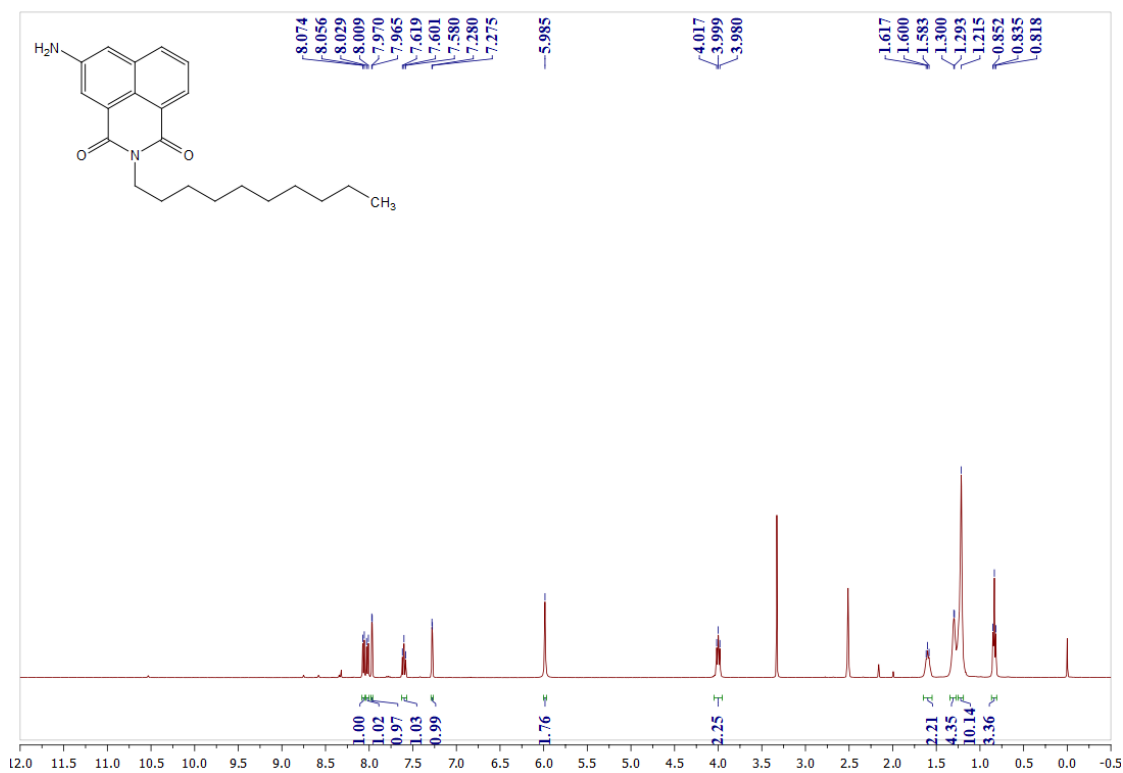

Figure S5. <sup>1</sup>H NMR Spectrum of compound 3c (400 MHz, DMSO-*d*<sub>6</sub>)

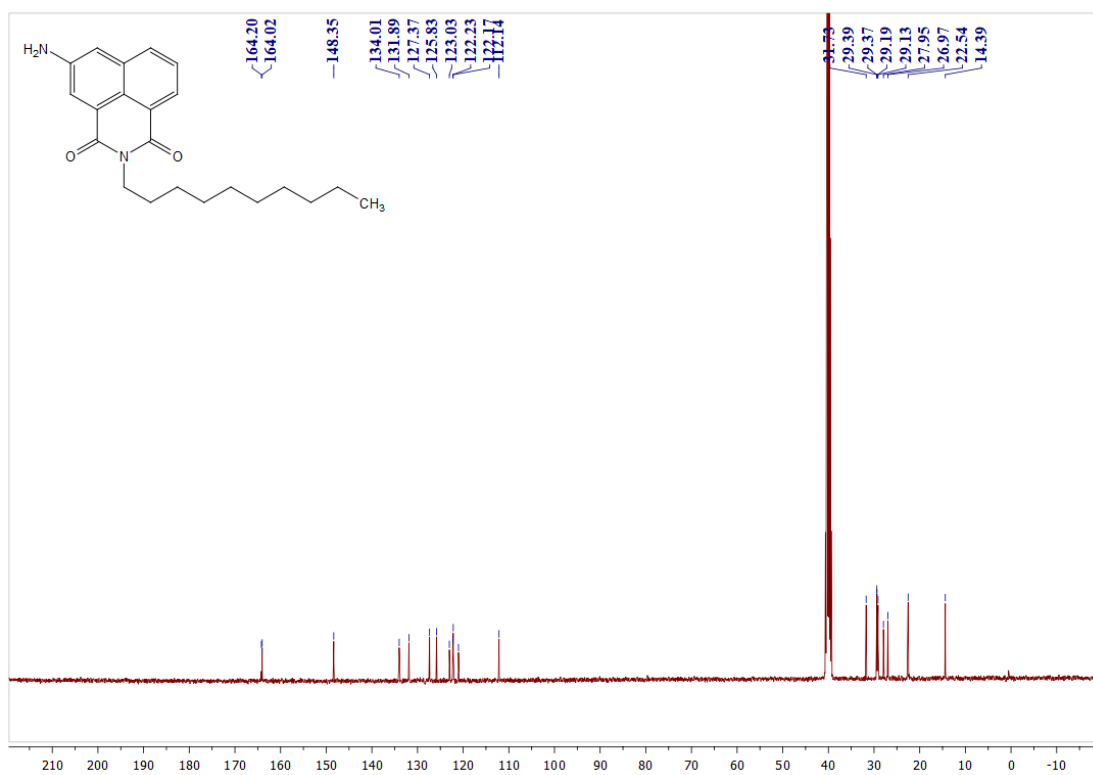

Figure S6. <sup>13</sup>C NMR Spectrum of compound 3c (101 MHz, DMSO-*d*<sub>6</sub>)

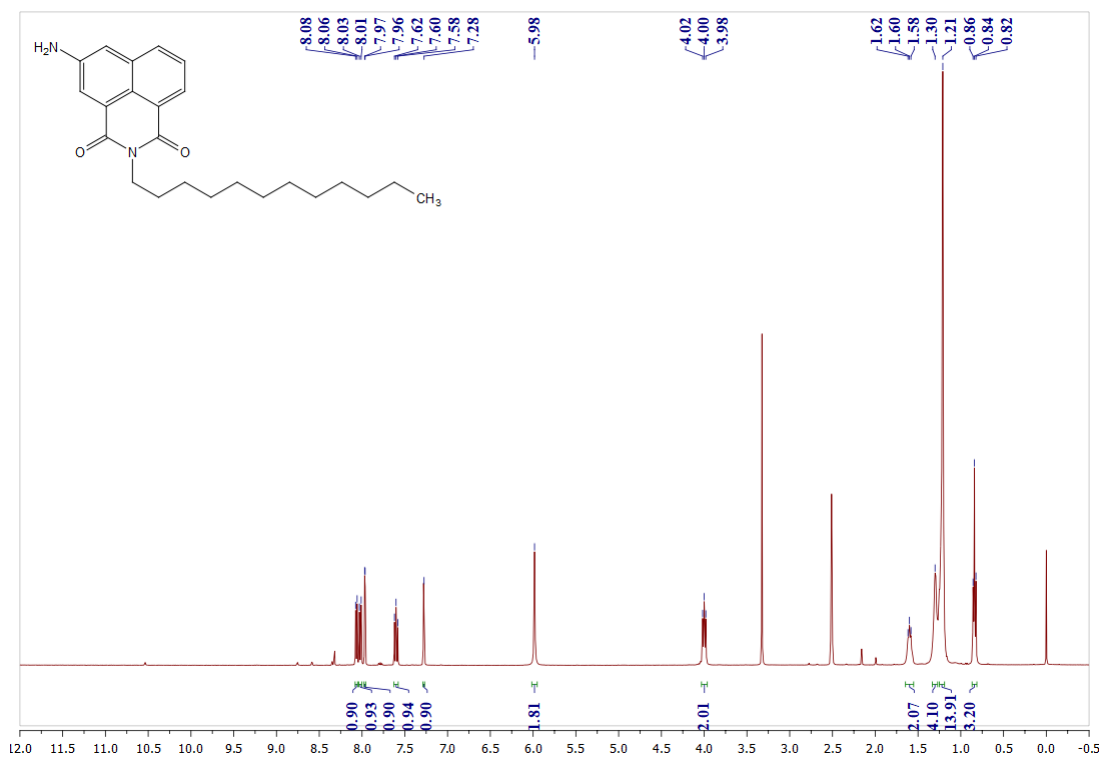

**Figure S7. <sup>1</sup>H NMR Spectrum of compound 3d (400 MHz, DMSO-*d*<sub>6</sub>)**

**Figure S8. <sup>13</sup>C NMR Spectrum of compound 3d (101 MHz, DMSO-*d*<sub>6</sub>)**

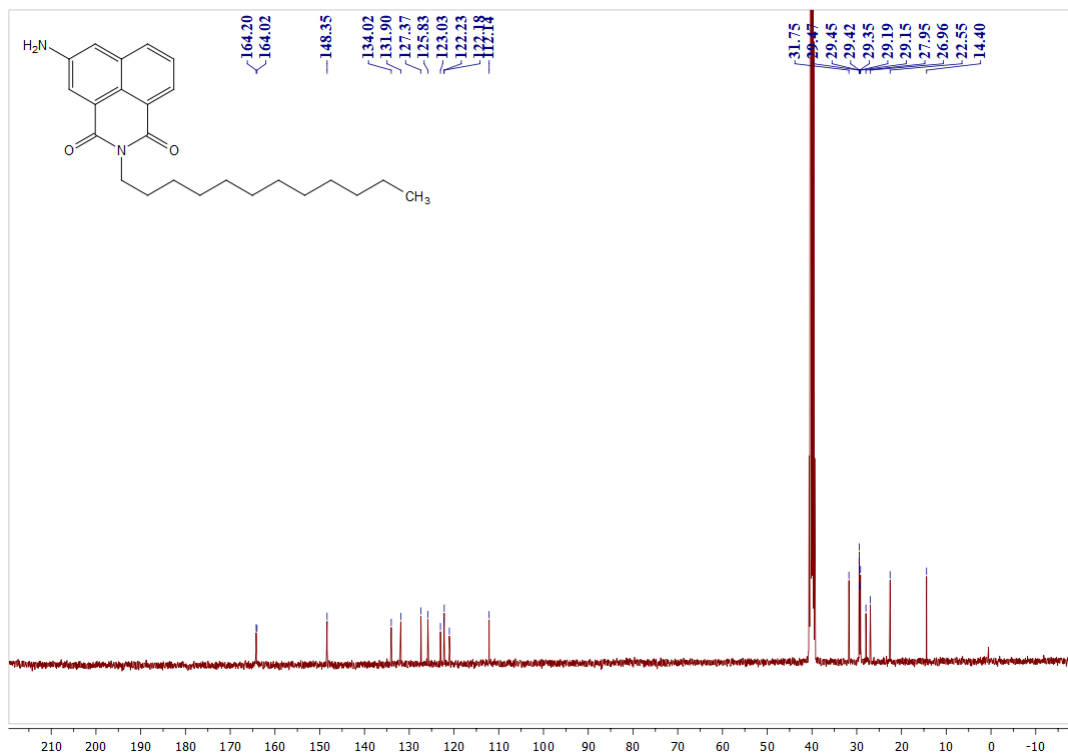

**Figure S8. <sup>13</sup>C NMR Spectrum of compound 3d (101 MHz, DMSO-*d*<sub>6</sub>)**

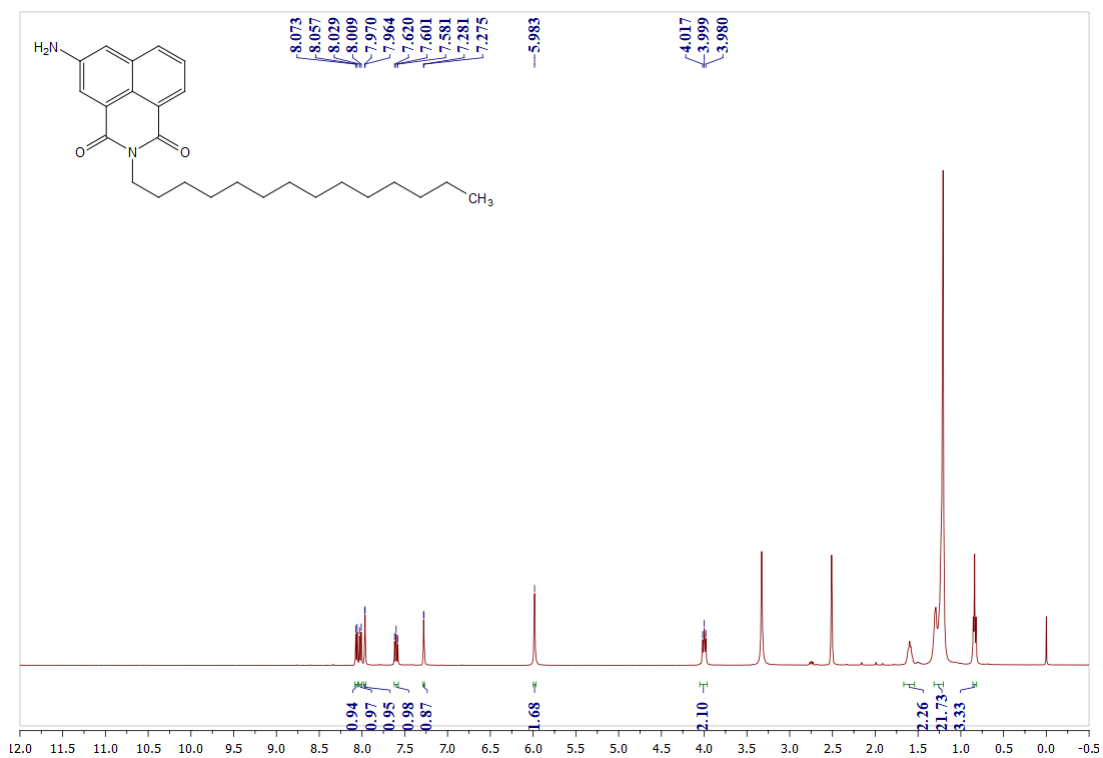

Figure S9.  $^1\text{H}$  NMR Spectrum of compound 3e (400 MHz,  $\text{DMSO-}d_6$ )

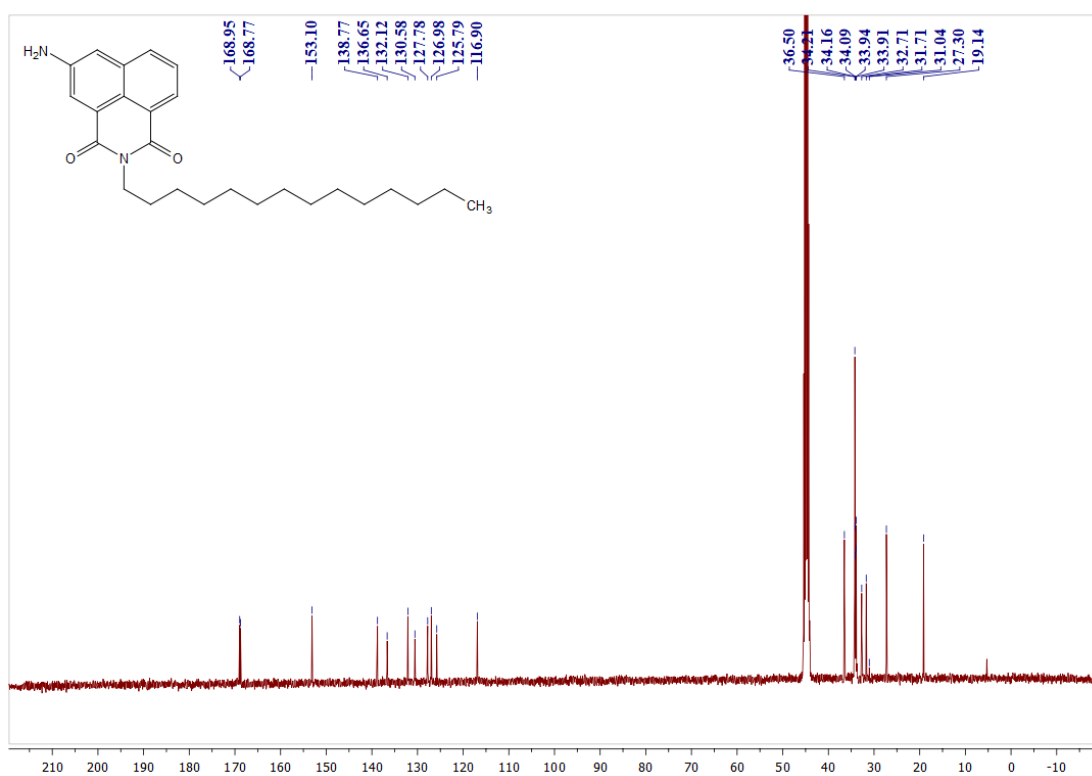

Figure S10.  $^{13}\text{C}$  NMR Spectrum of compound 3e (101 MHz,  $\text{DMSO-}d_6$ )

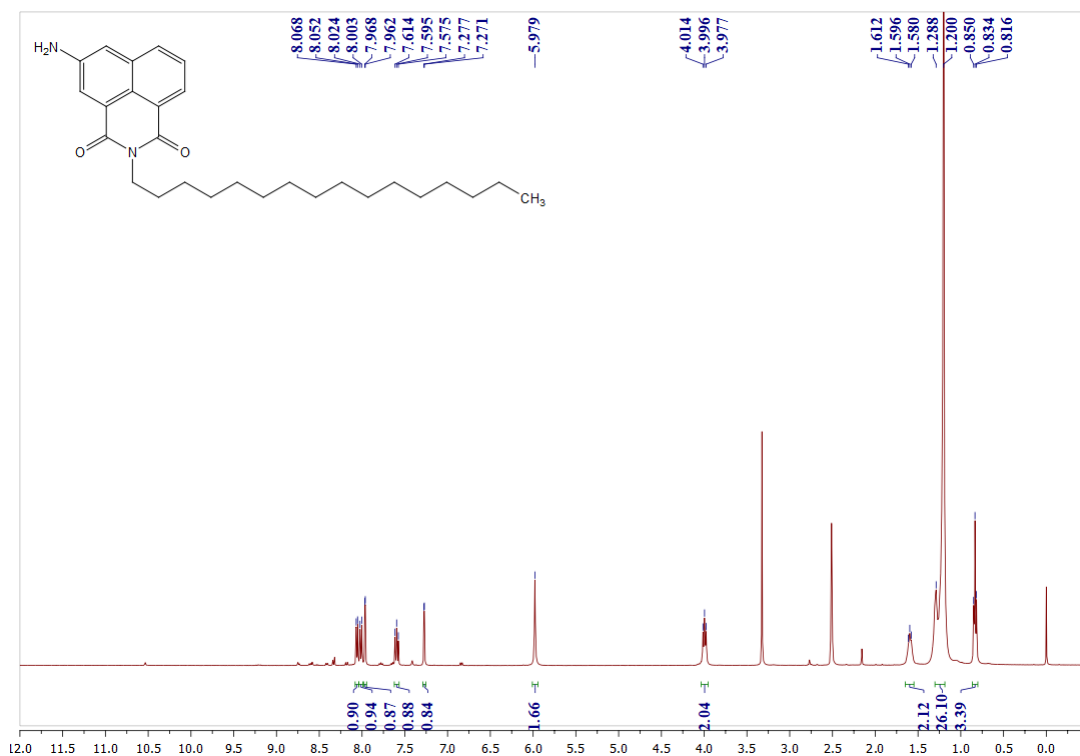

Figure S11.  $^1\text{H}$  NMR Spectrum of compound 3f (400 MHz,  $\text{DMSO-}d_6$ )

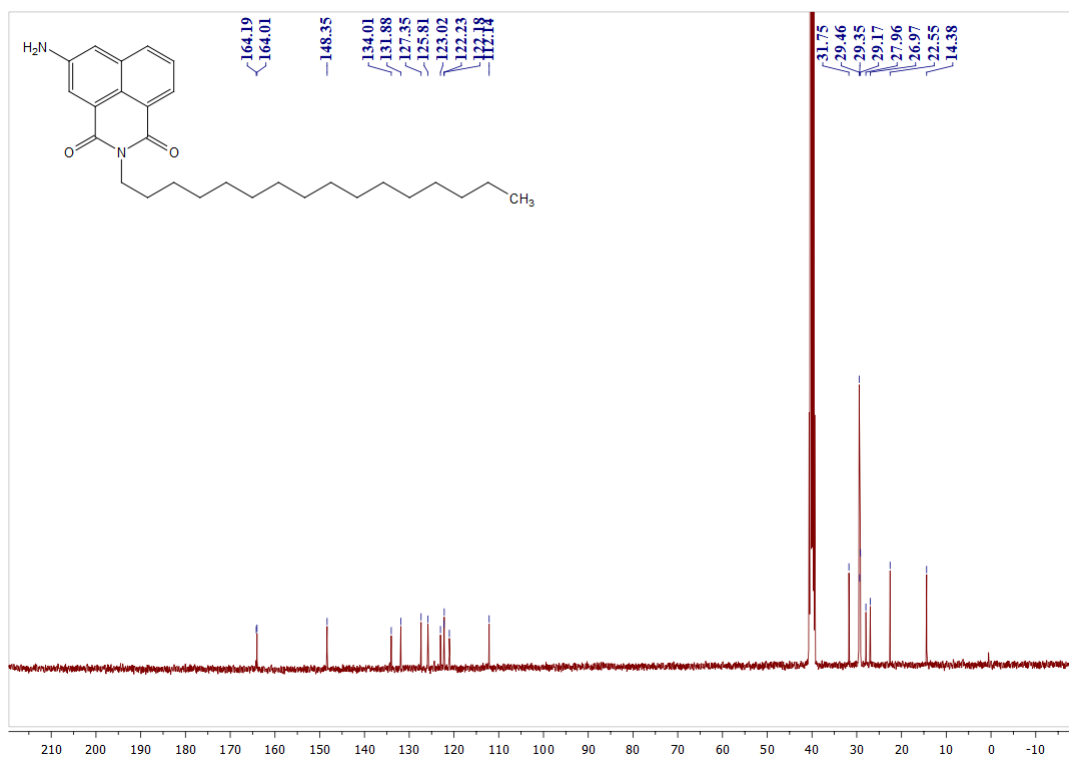

Figure S12.  $^{13}\text{C}$  NMR Spectrum of compound 3f (101 MHz,  $\text{DMSO-}d_6$ )

Figure S13.  $^1\text{H}$  NMR Spectrum of compound 3g (400 MHz,  $\text{DMSO-}d_6$ )

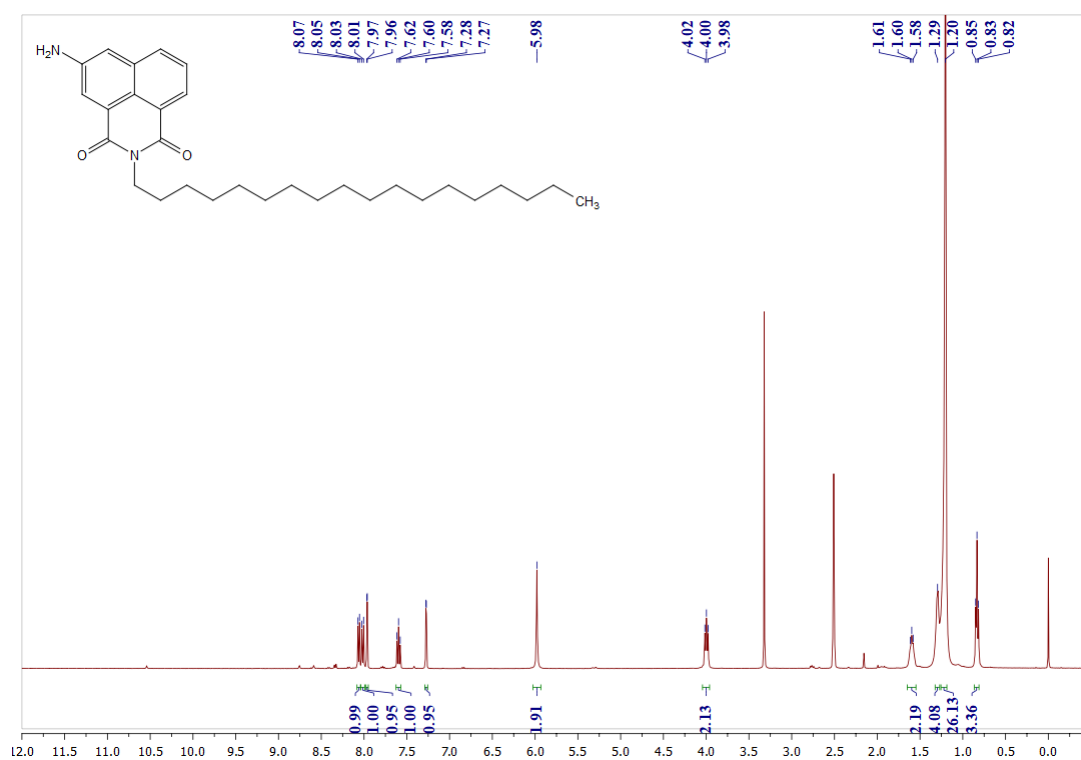

Figure S13.  $^1\text{H}$  NMR Spectrum of compound 3g (400 MHz,  $\text{DMSO-}d_6$ )

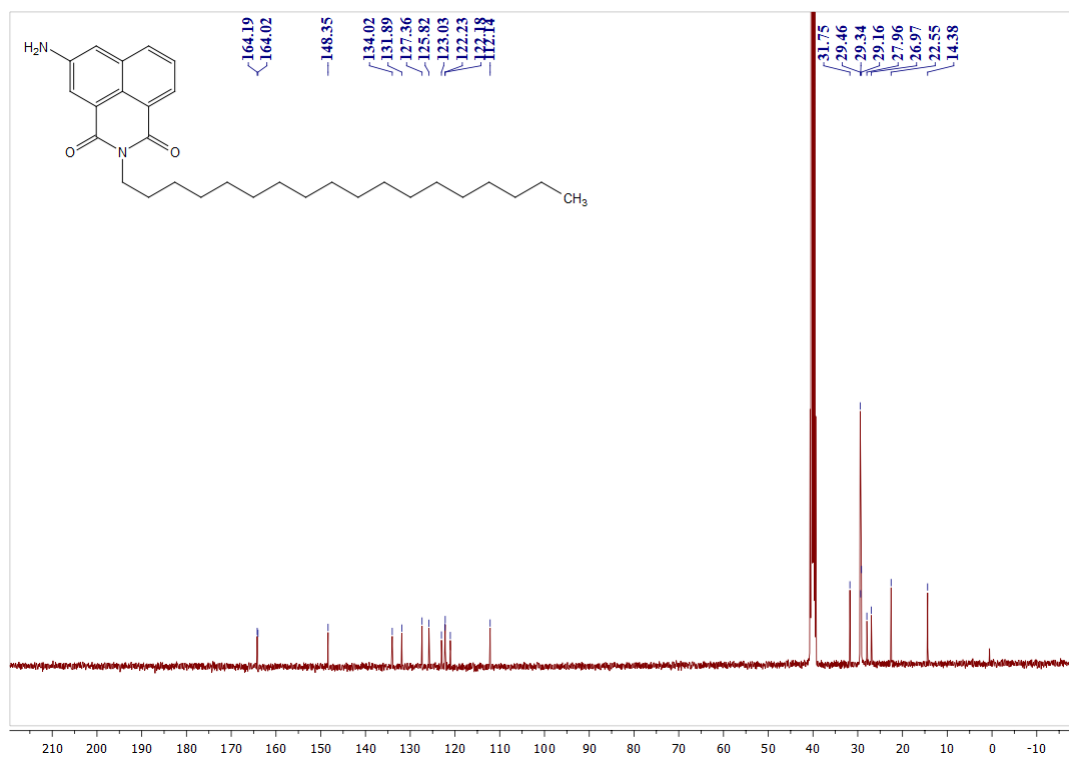

Figure S14.  $^{13}\text{C}$  NMR Spectrum of compound 3g (101 MHz,  $\text{DMSO-}d_6$ )

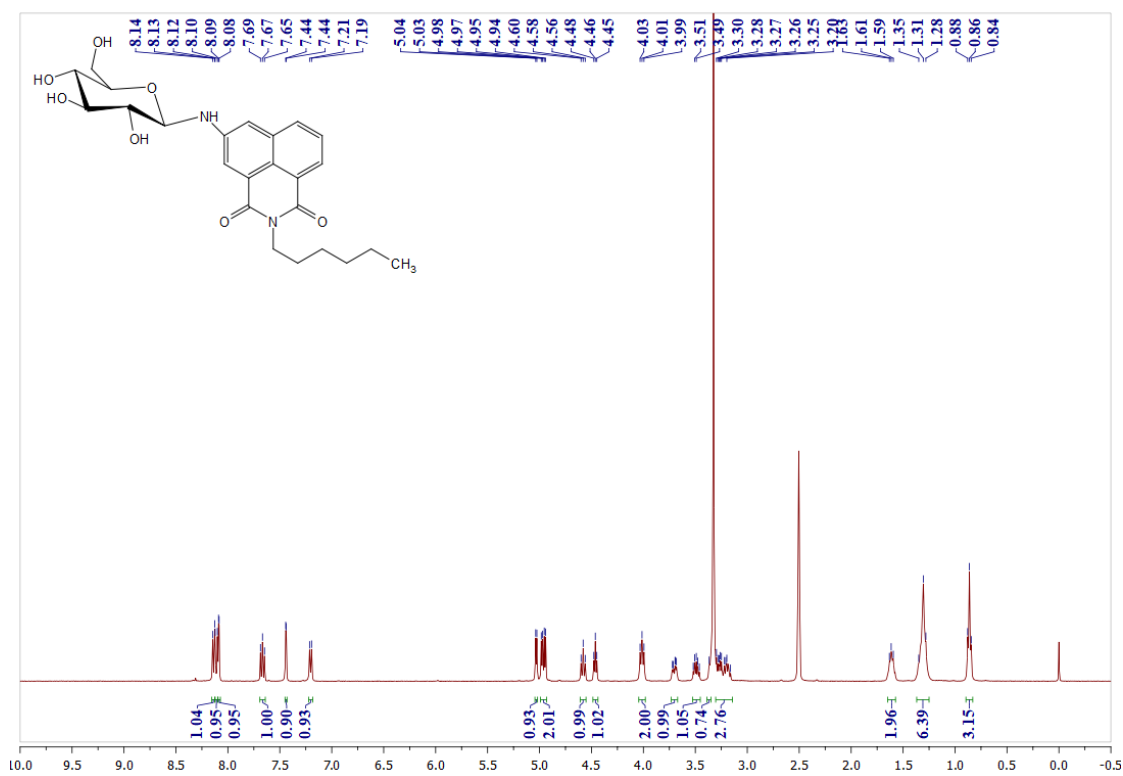

Figure S15. <sup>1</sup>H NMR Spectrum of compound 5a (400 MHz, DMSO-*d*<sub>6</sub>)

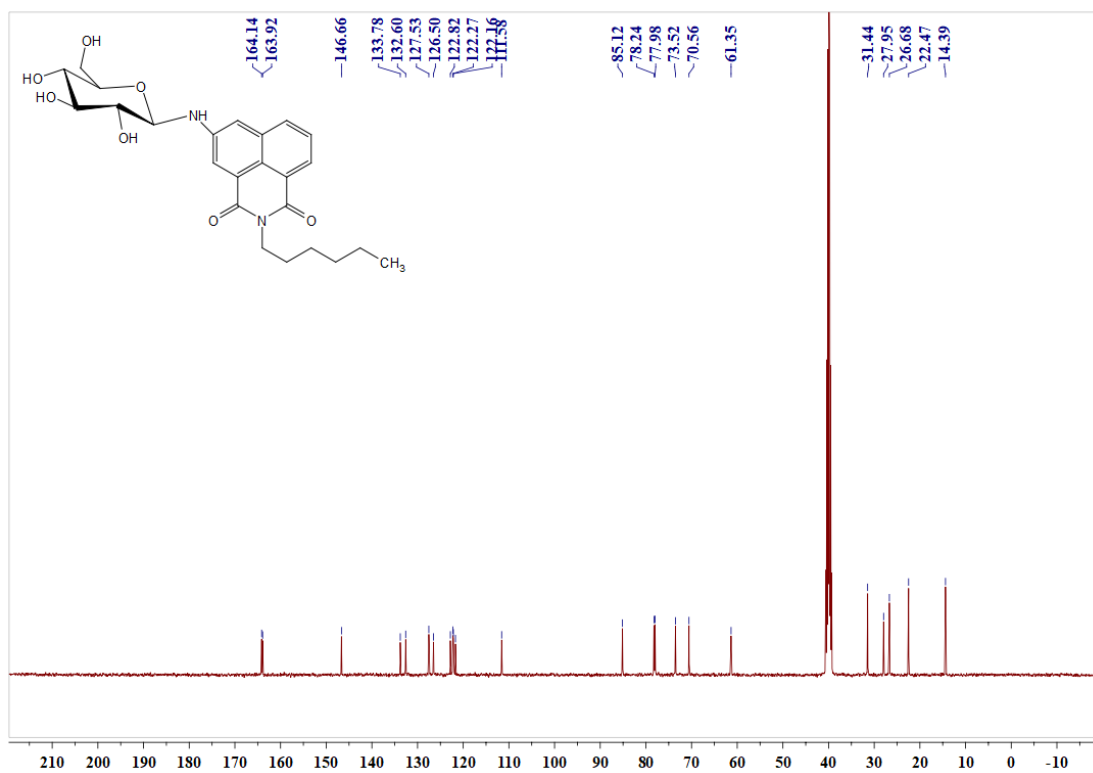

Figure S16. <sup>13</sup>C NMR Spectrum of compound 5a (101 MHz, DMSO-*d*<sub>6</sub>)



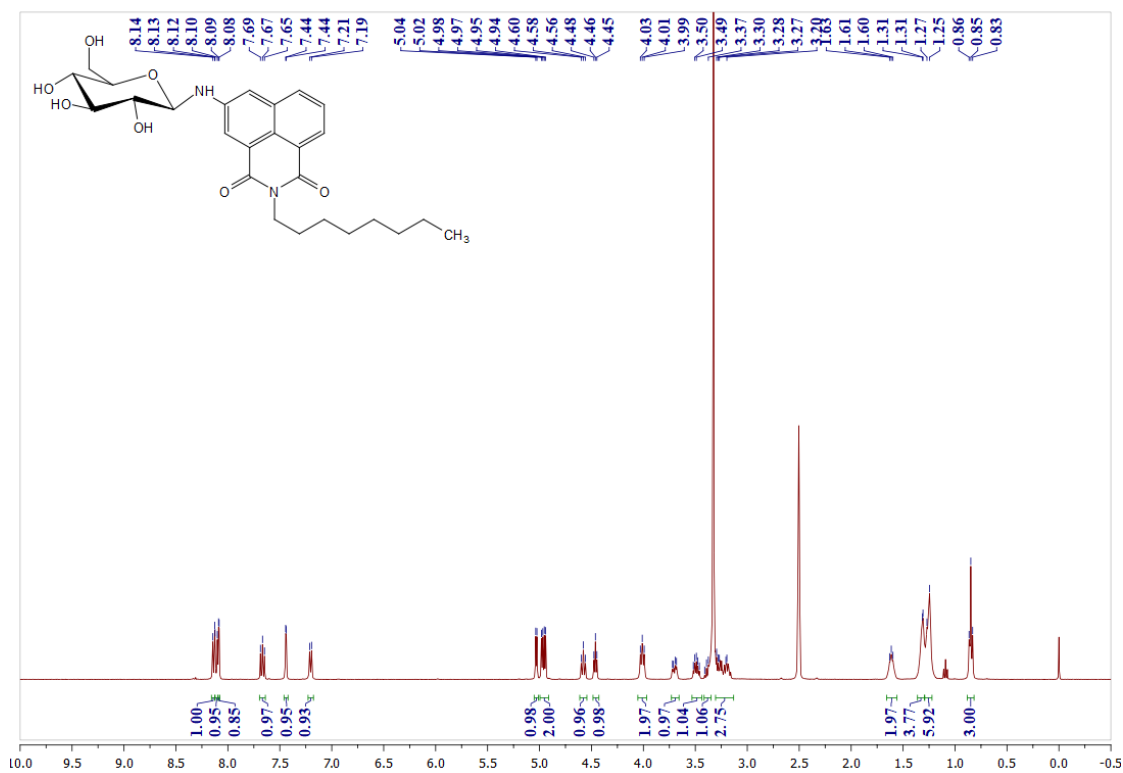

**Figure S17. <sup>1</sup>H NMR Spectrum of compound 5b (400 MHz, DMSO-*d*<sub>6</sub>)**

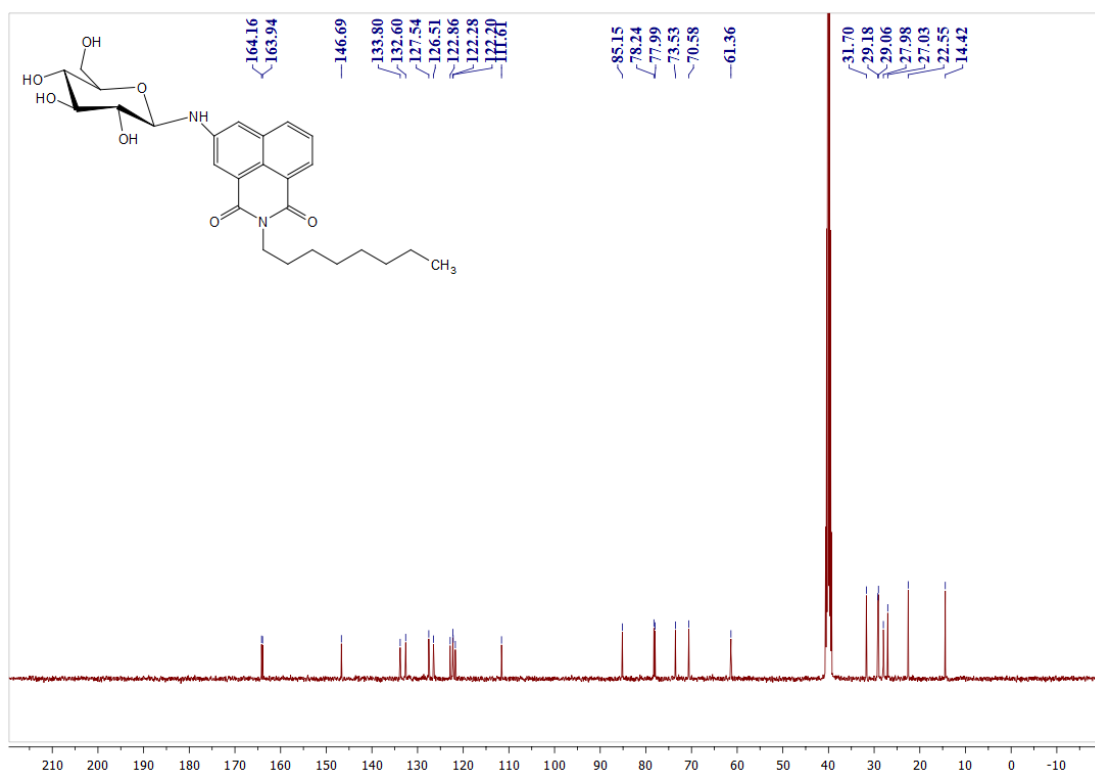

**Figure S18. <sup>13</sup>C NMR Spectrum of compound 5b (101 MHz, DMSO-*d*<sub>6</sub>)**

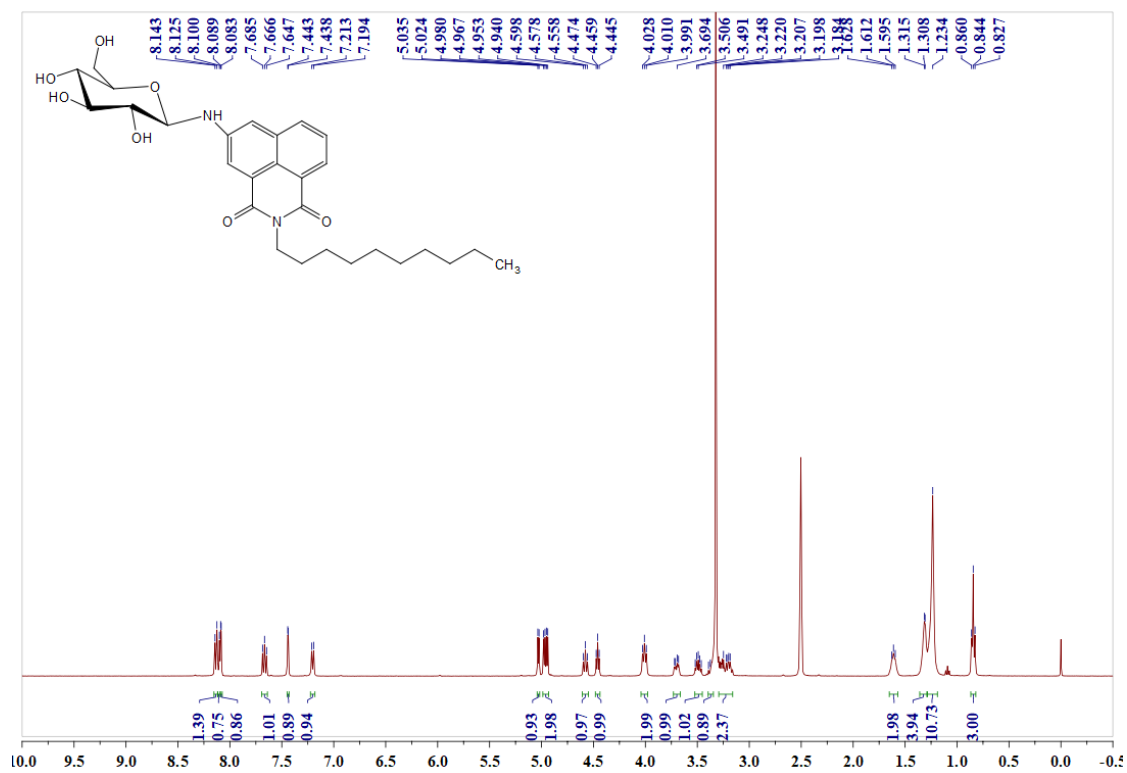

Figure S19. <sup>1</sup>H NMR Spectrum of compound 5c (400 MHz, DMSO-*d*<sub>6</sub>)

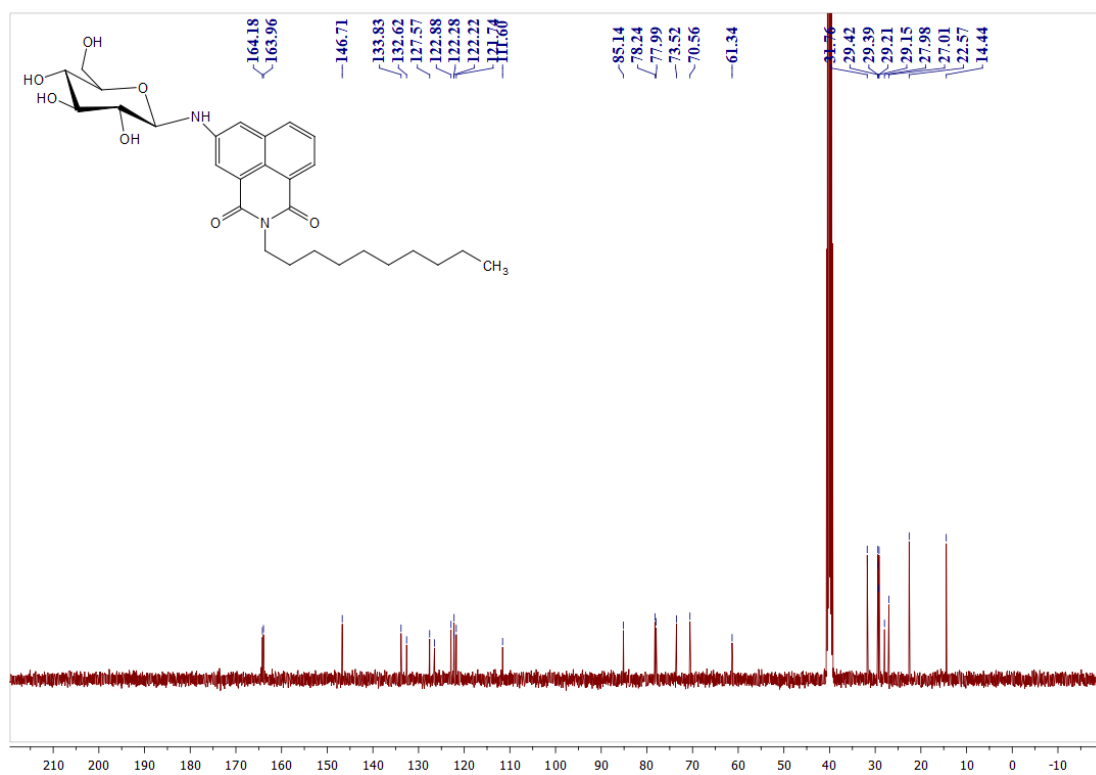

Figure S20. <sup>13</sup>C NMR Spectrum of compound 5c (101 MHz, DMSO-*d*<sub>6</sub>)

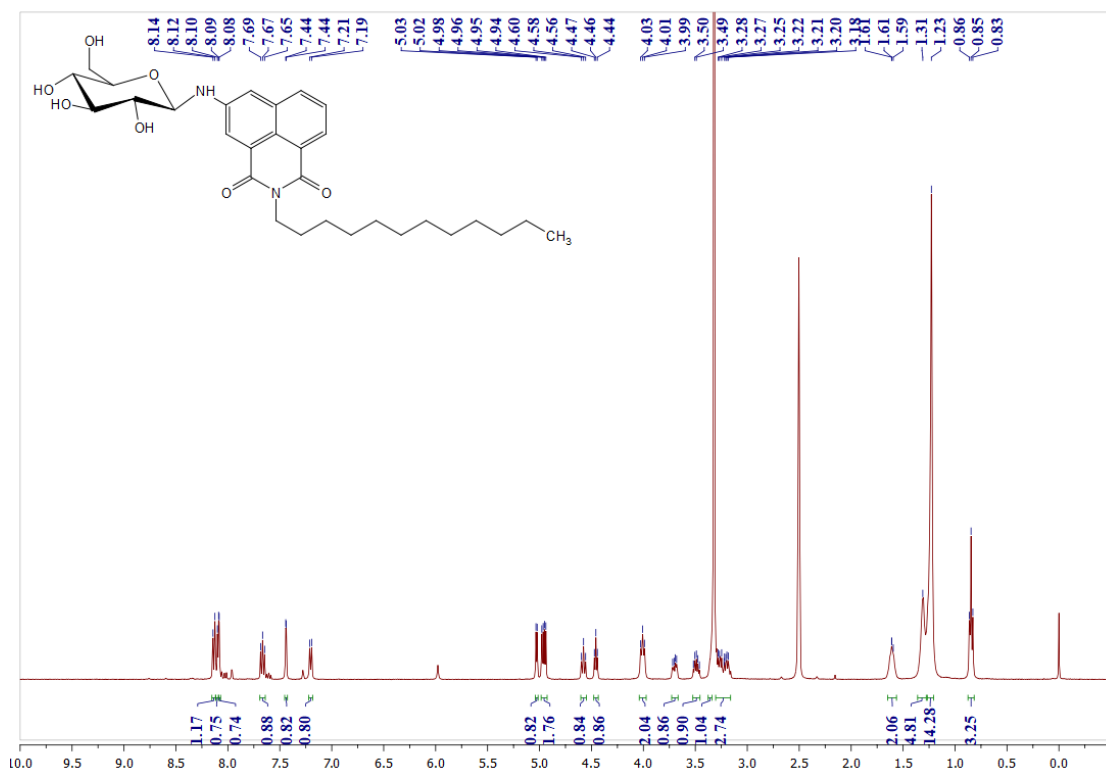

Figure S21. <sup>1</sup>H NMR Spectrum of compound 5d (400 MHz, DMSO-*d*<sub>6</sub>)

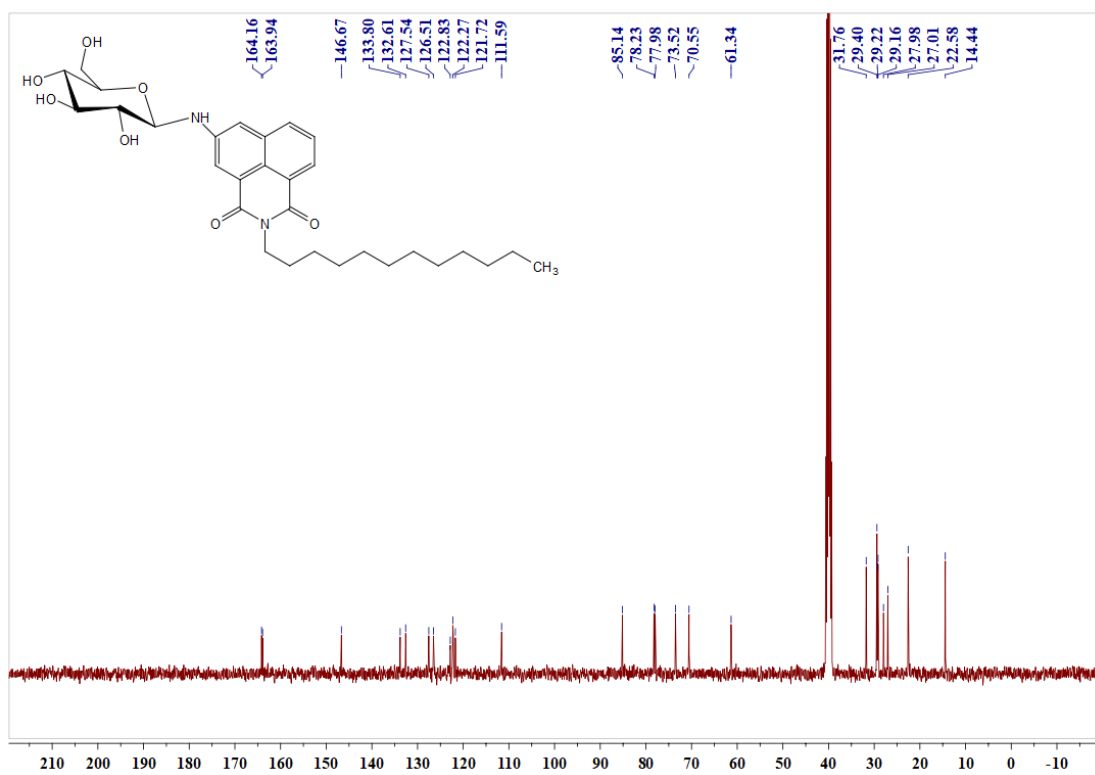

Figure S22. <sup>13</sup>C NMR Spectrum of compound 5d (101 MHz, DMSO-*d*<sub>6</sub>)

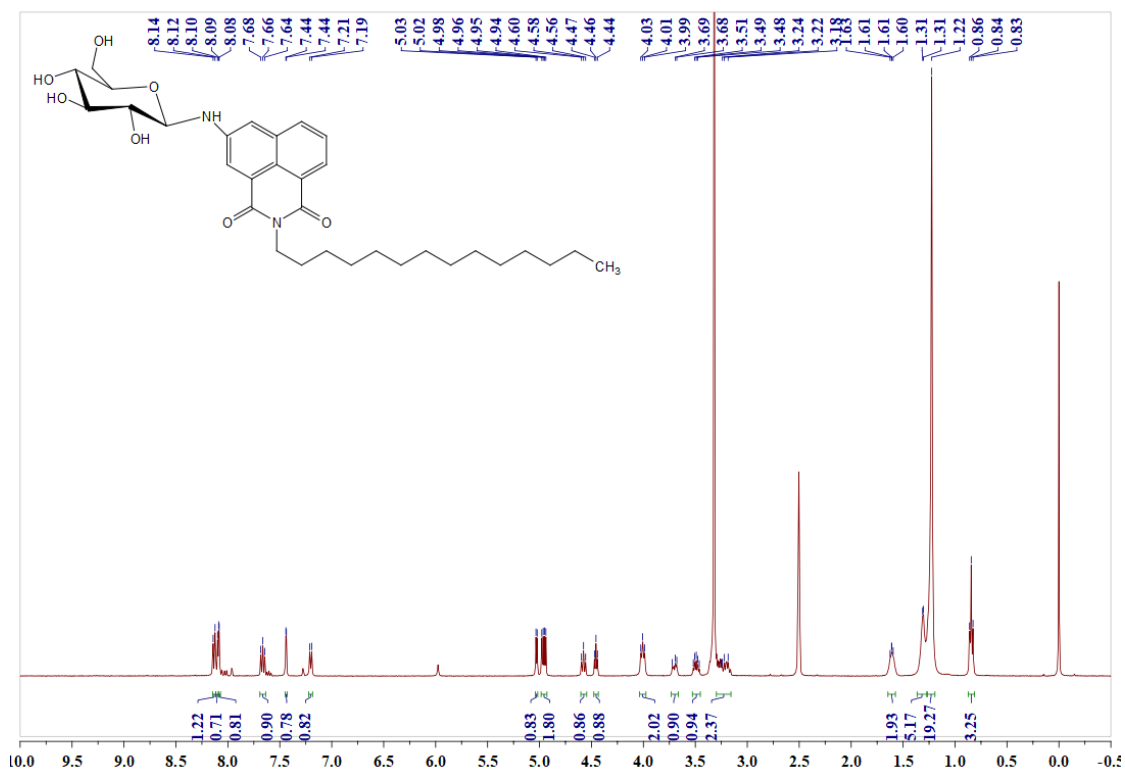

Figure S23. <sup>1</sup>H NMR Spectrum of compound 5e (400 MHz, DMSO-*d*<sub>6</sub>)

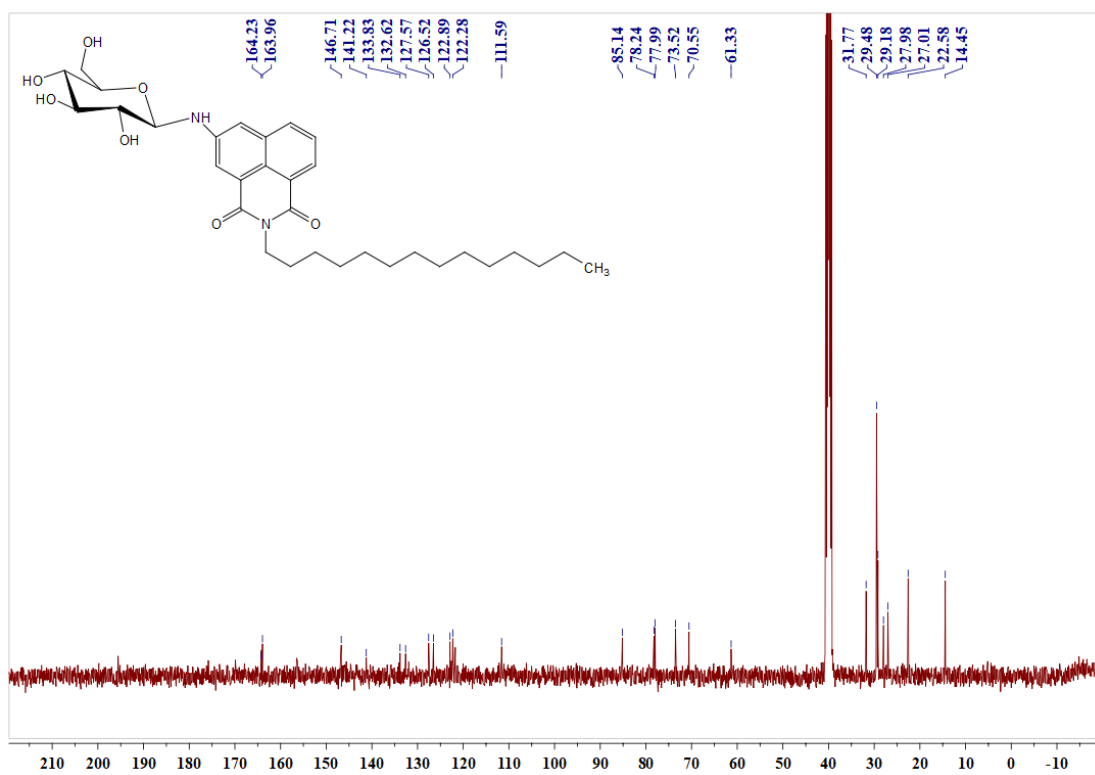

Figure S24. <sup>13</sup>C NMR Spectrum of compound 5e (101 MHz, DMSO-*d*<sub>6</sub>)

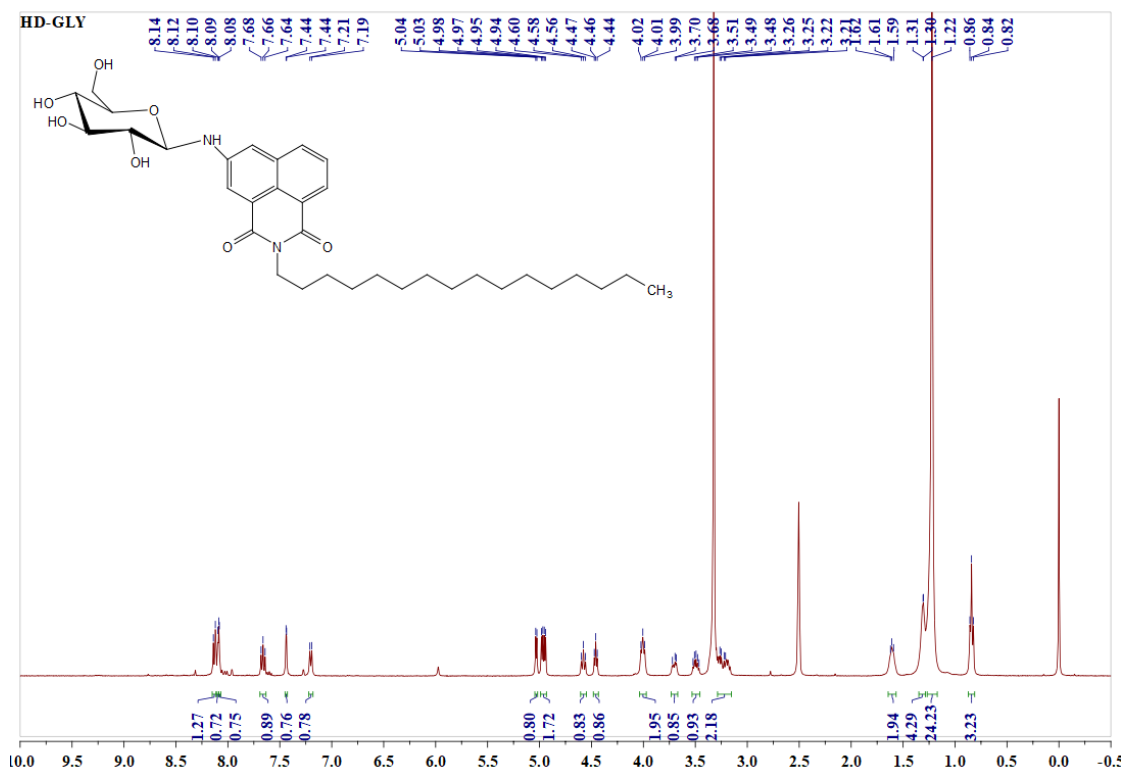

Figure S25.  $^1\text{H}$  NMR Spectrum of compound 5f (400 MHz,  $\text{DMSO-}d_6$ )

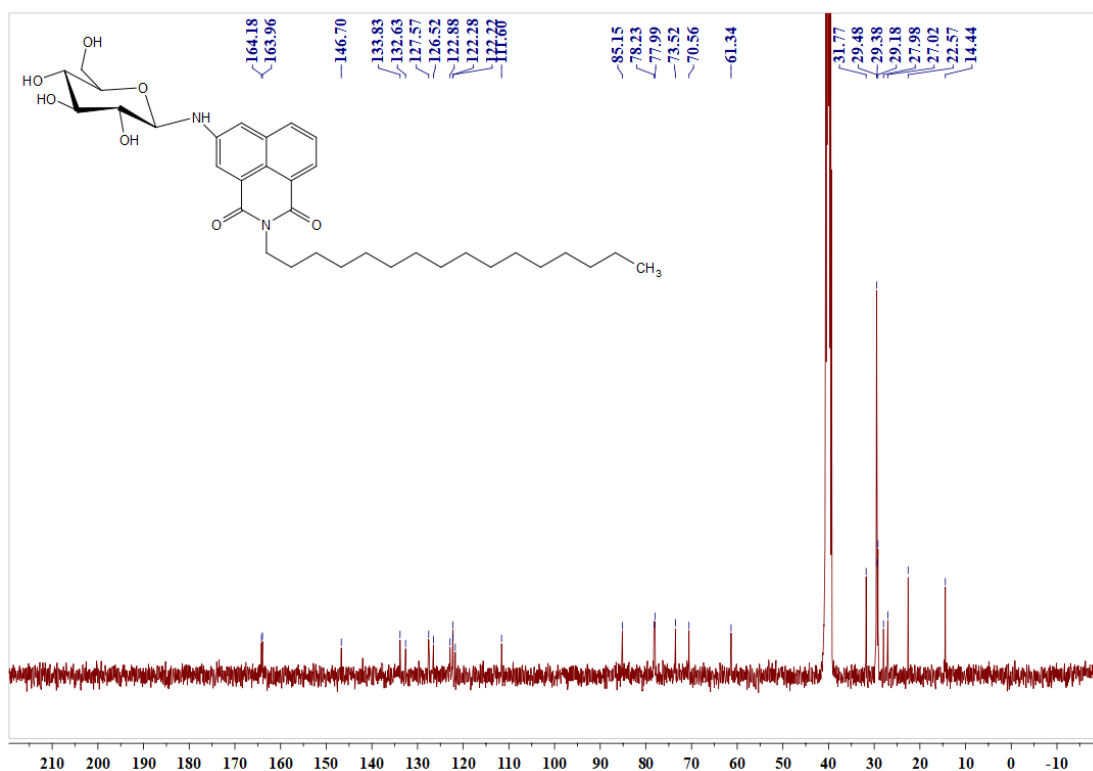

Figure S26.  $^{13}\text{C}$  NMR Spectrum of compound 5f (101 MHz,  $\text{DMSO-}d_6$ )

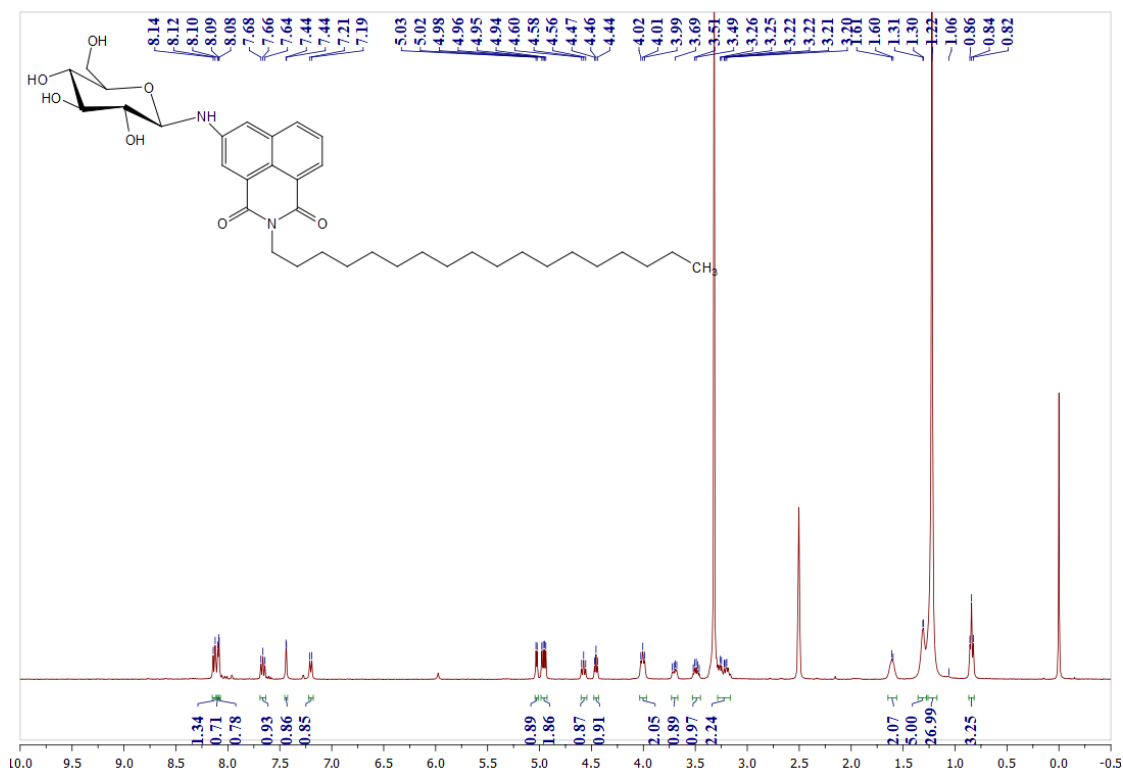

Figure S27. <sup>1</sup>H NMR Spectrum of compound 5g (400 MHz, DMSO-*d*<sub>6</sub>)

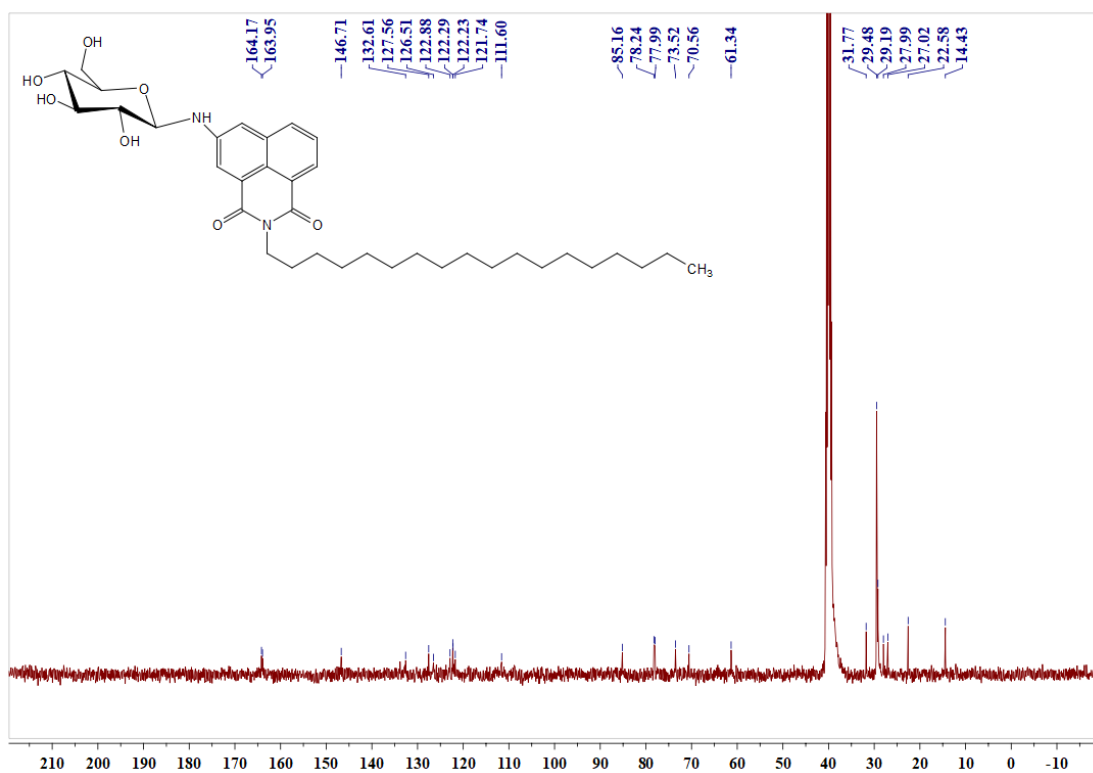

Figure S28. <sup>13</sup>C NMR Spectrum of compound 5g (101 MHz, DMSO-*d*<sub>6</sub>)

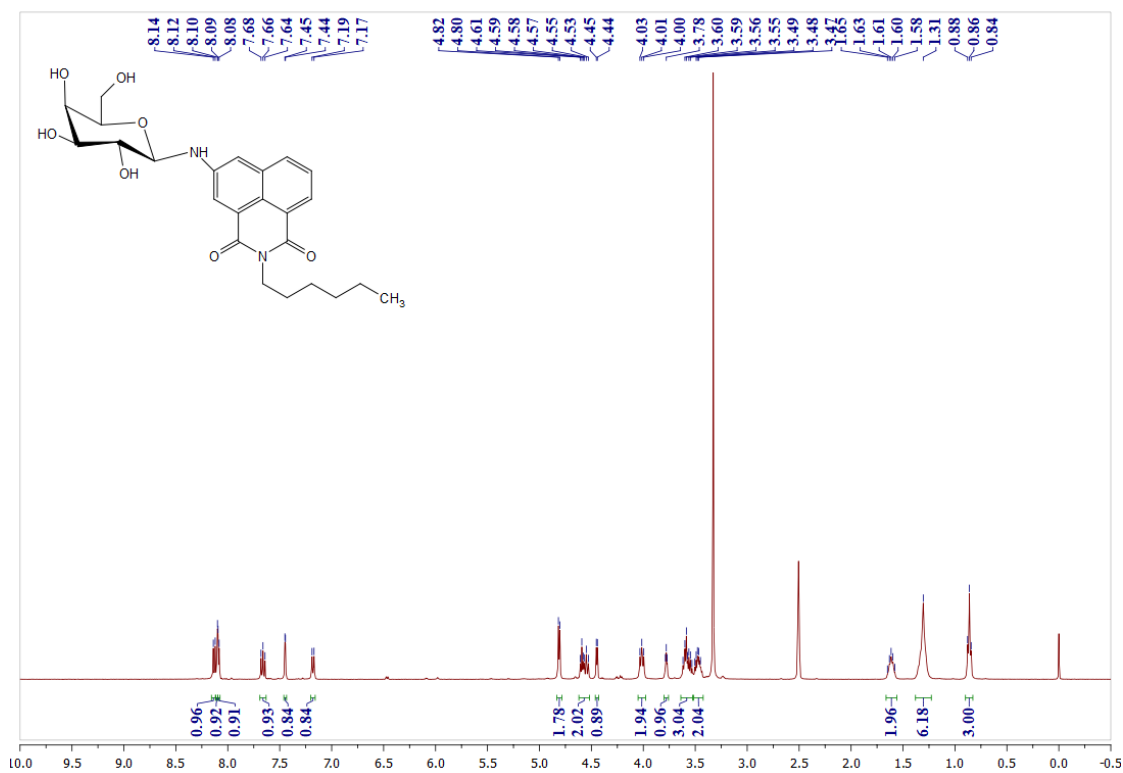

Figure S29. <sup>1</sup>H NMR Spectrum of compound 6a (400 MHz, DMSO-*d*<sub>6</sub>)

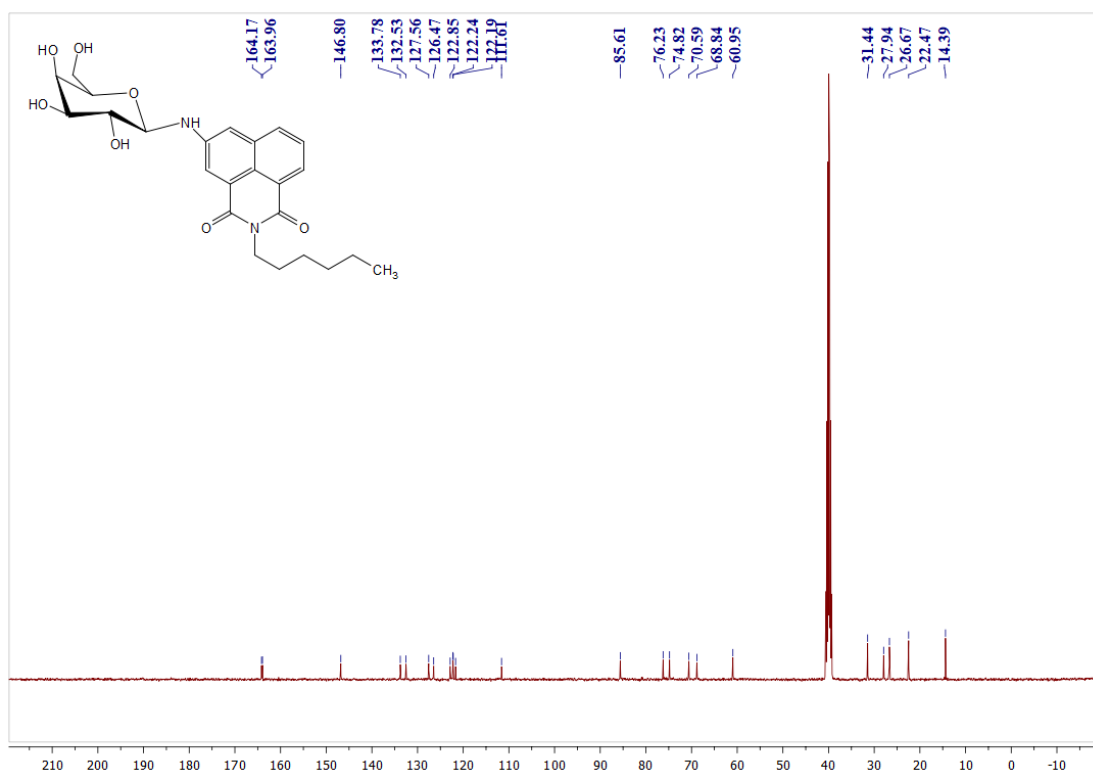

Figure S30. <sup>13</sup>C NMR Spectrum of compound 6a (101 MHz, DMSO-*d*<sub>6</sub>)

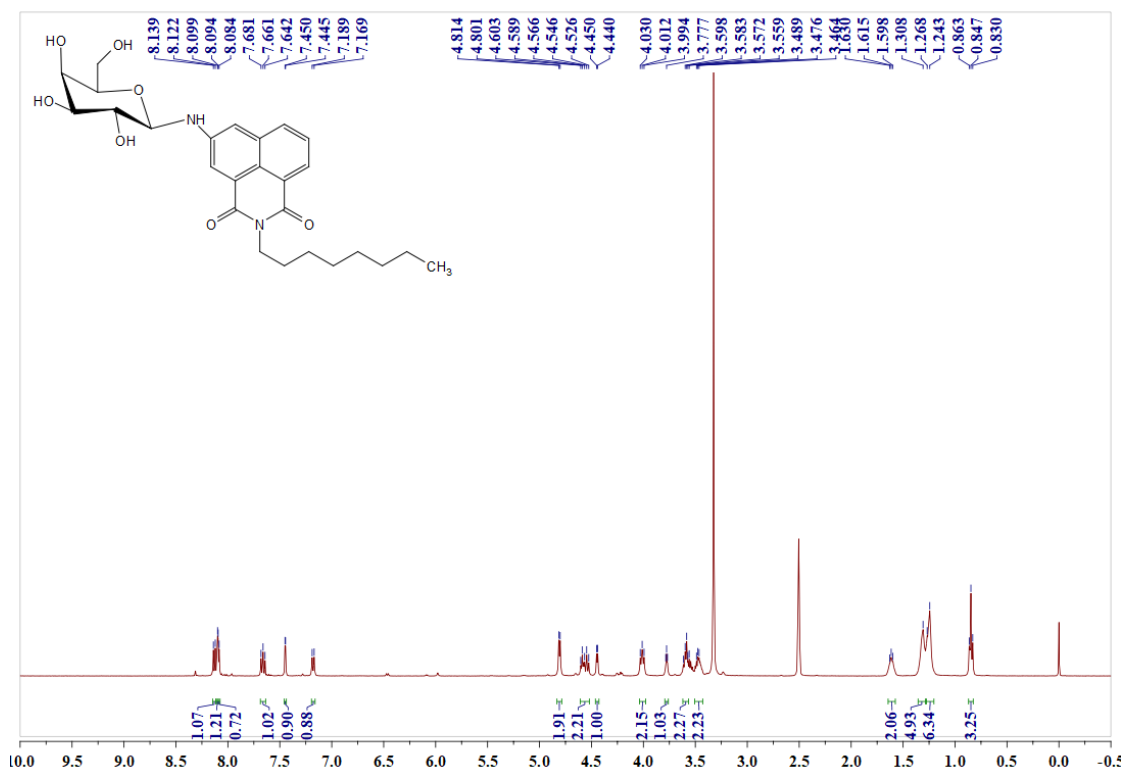

Figure S31. <sup>1</sup>H NMR Spectrum of compound 6b (400 MHz, DMSO-*d*<sub>6</sub>)

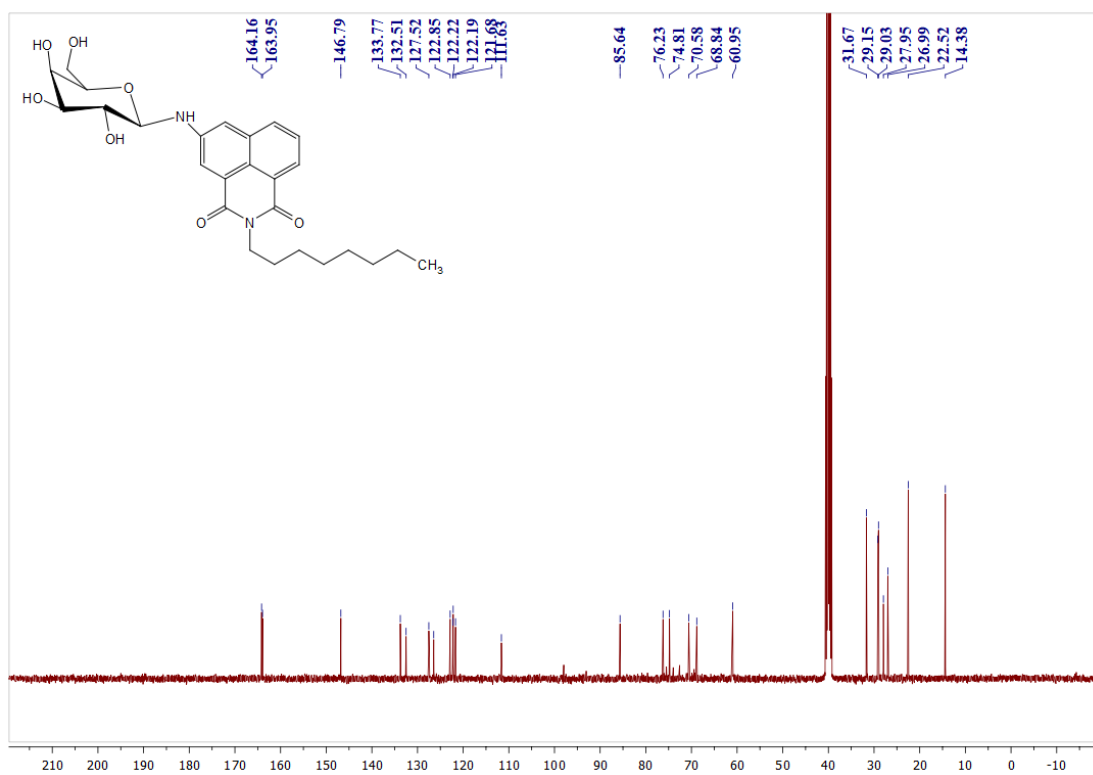

Figure S32. <sup>13</sup>C NMR Spectrum of compound 6b (101 MHz, DMSO-*d*<sub>6</sub>)



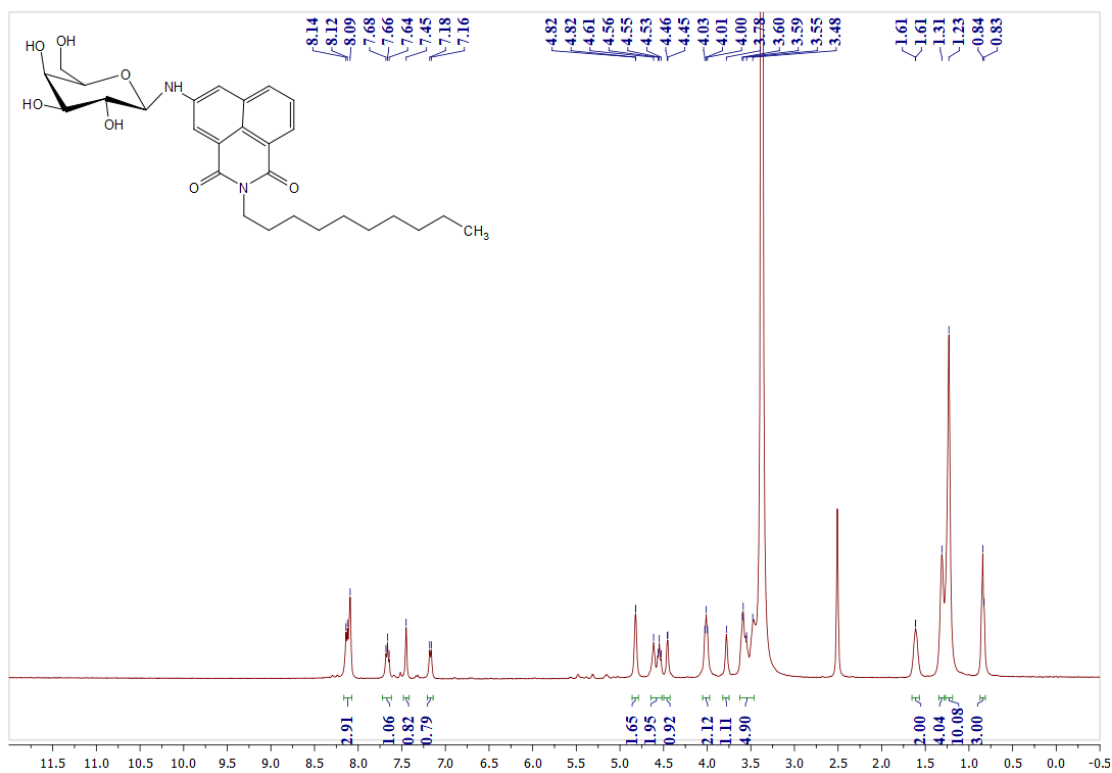

**Figure S33. <sup>1</sup>H NMR Spectrum of compound 6c (400 MHz, DMSO-*d*<sub>6</sub>)**

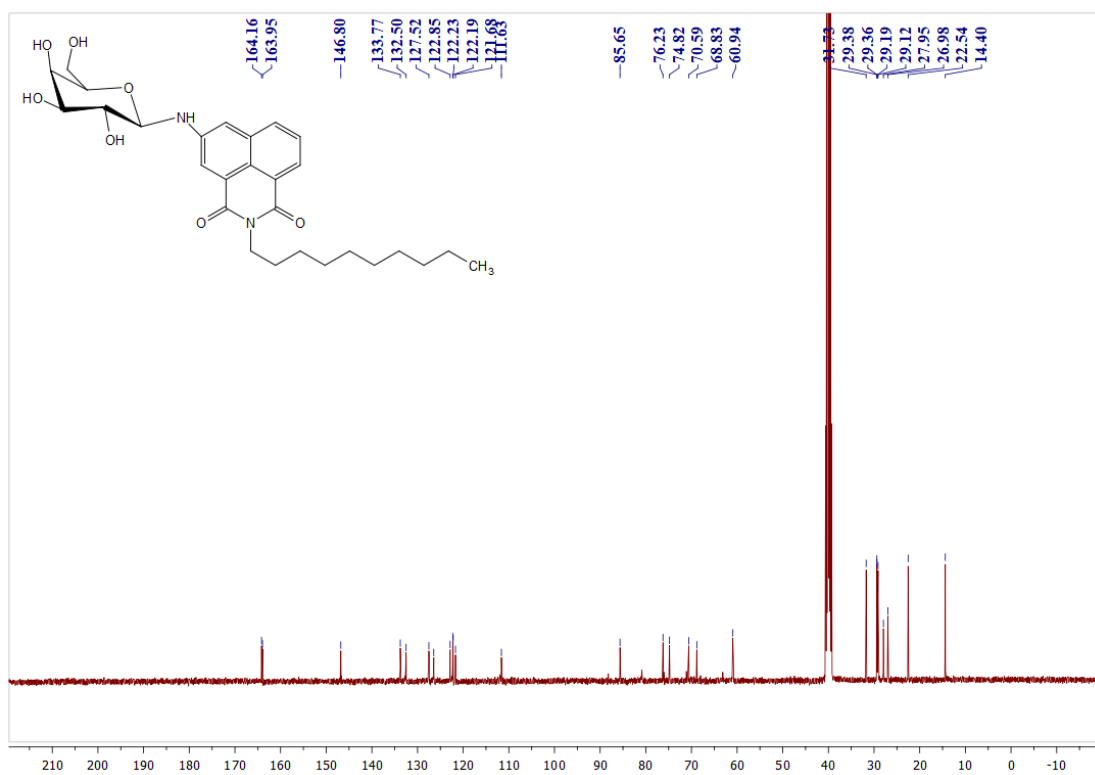

**Figure S33. <sup>13</sup>C NMR Spectrum of compound 6c (101 MHz, DMSO-*d*<sub>6</sub>)**

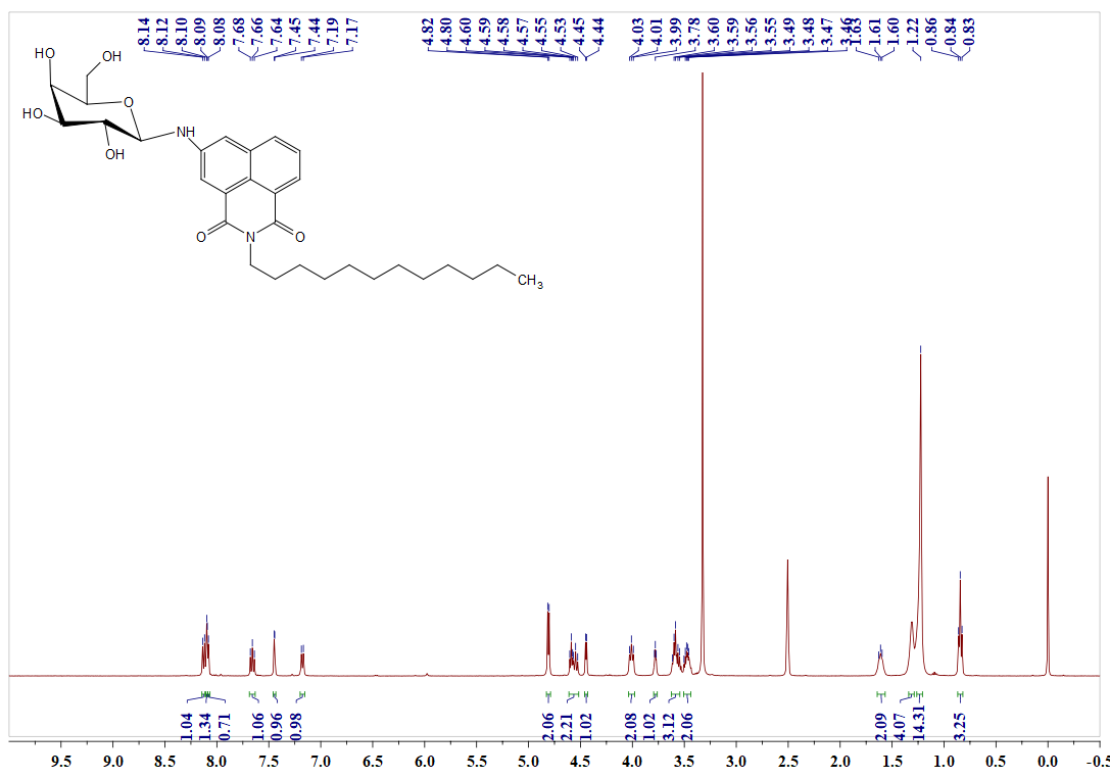

Figure S34.  $^1\text{H}$  NMR Spectrum of compound 6d (400 MHz,  $\text{DMSO-}d_6$ )

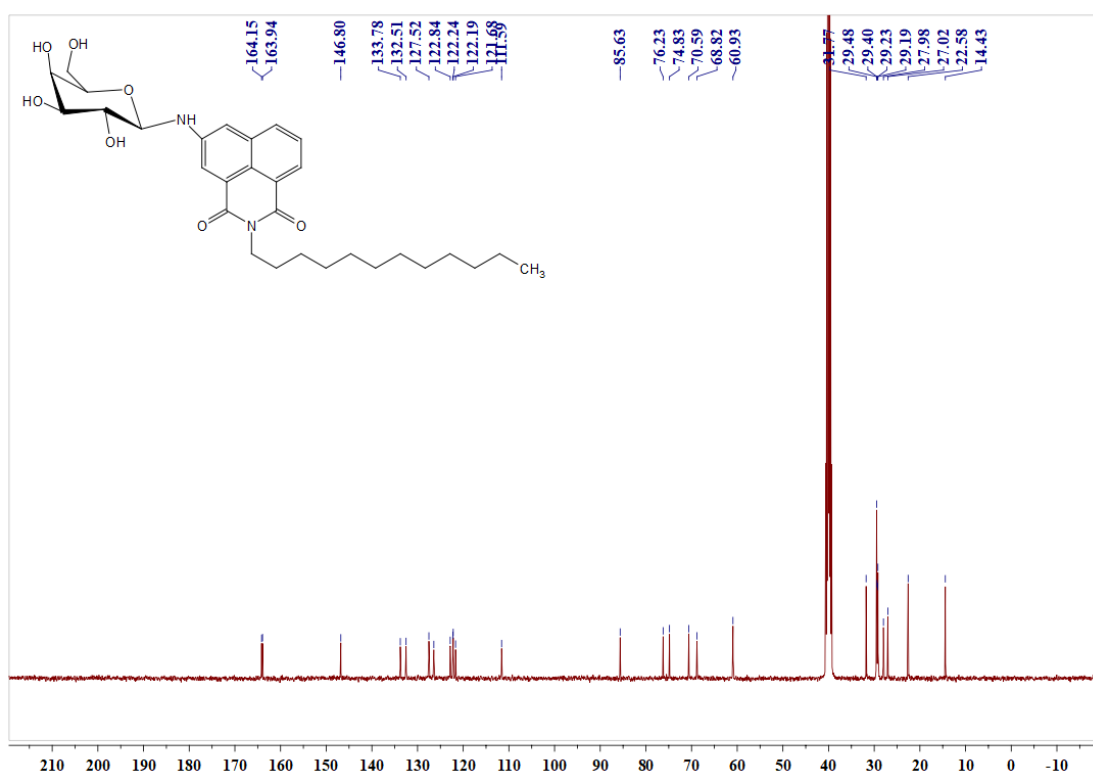

Figure S35.  $^{13}\text{C}$  NMR Spectrum of compound 6d (101 MHz,  $\text{DMSO-}d_6$ )

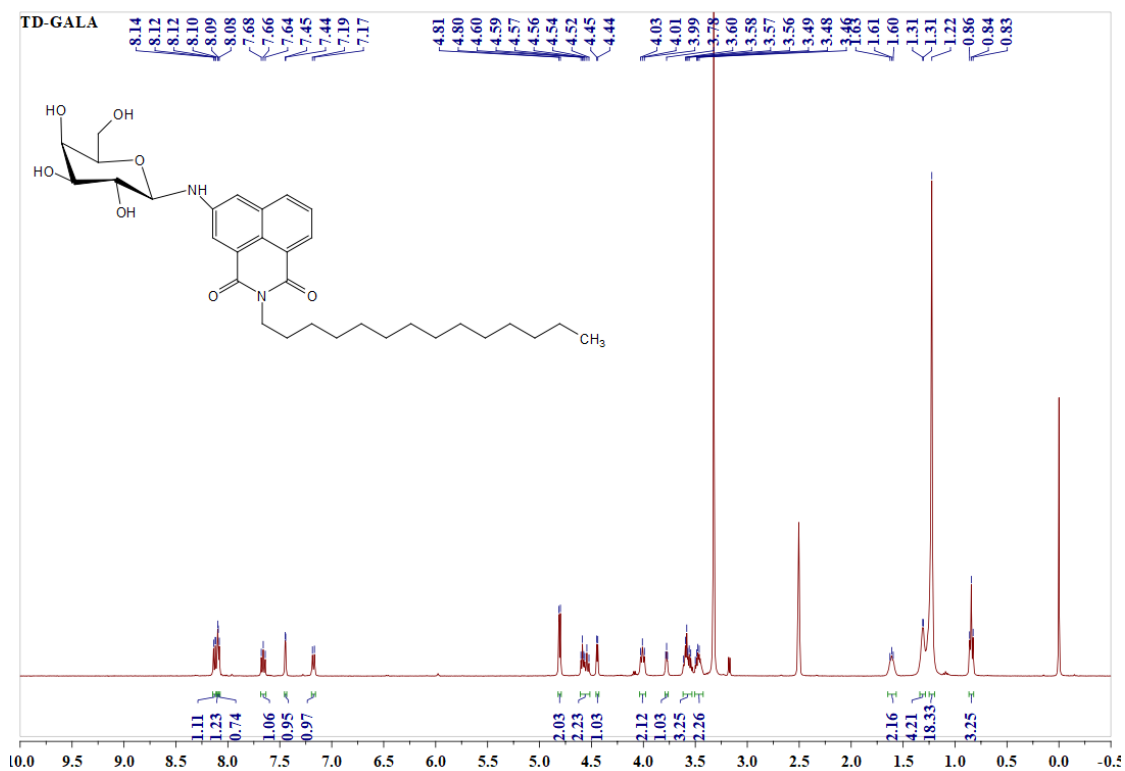

Figure S36. <sup>1</sup>H NMR Spectrum of compound 6e (400 MHz, DMSO-*d*<sub>6</sub>)

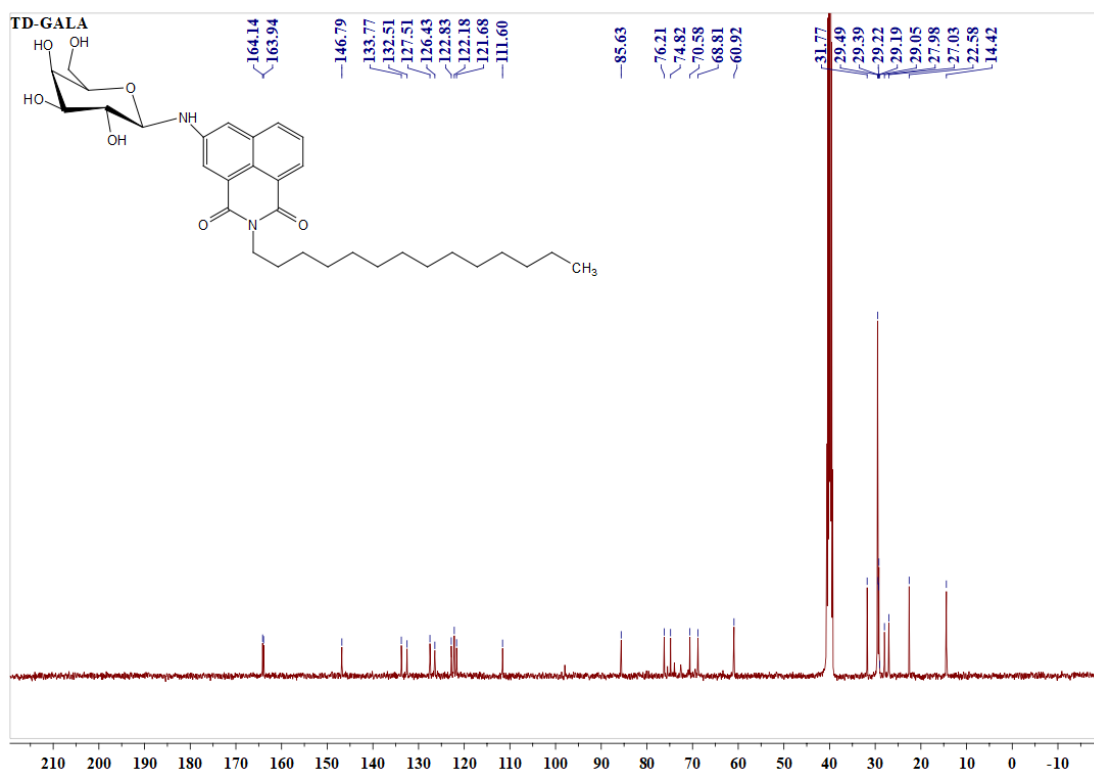

Figure S37. <sup>13</sup>C NMR Spectrum of compound 6e (101 MHz, DMSO-*d*<sub>6</sub>)

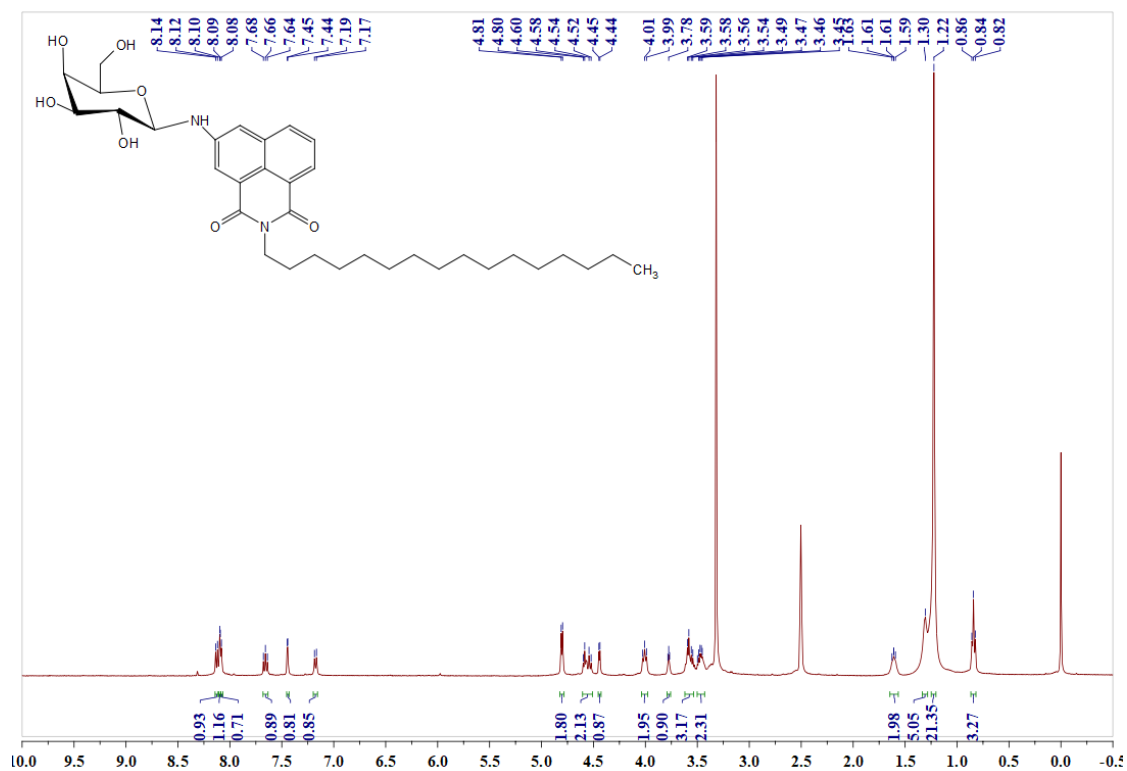

Figure S38.  $^1\text{H}$  NMR Spectrum of compound 6f (400 MHz,  $\text{DMSO-}d_6$ )

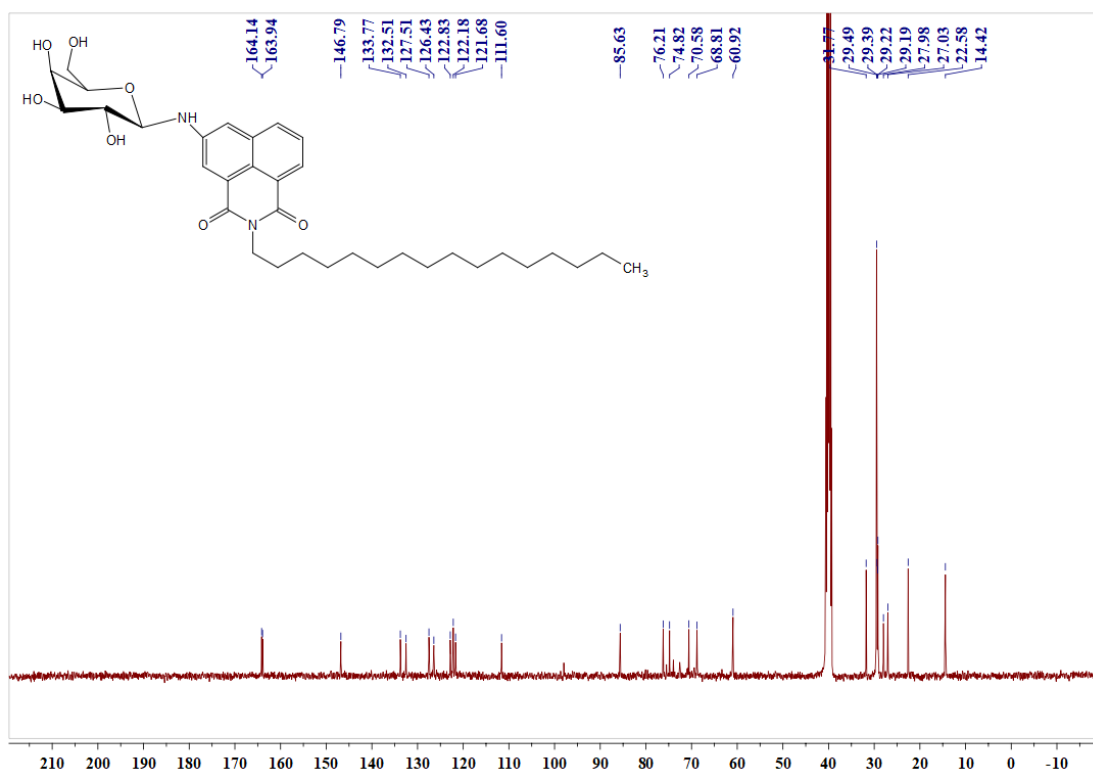

Figure S39.  $^{13}\text{C}$  NMR Spectrum of compound 6f (101 MHz,  $\text{DMSO-}d_6$ )

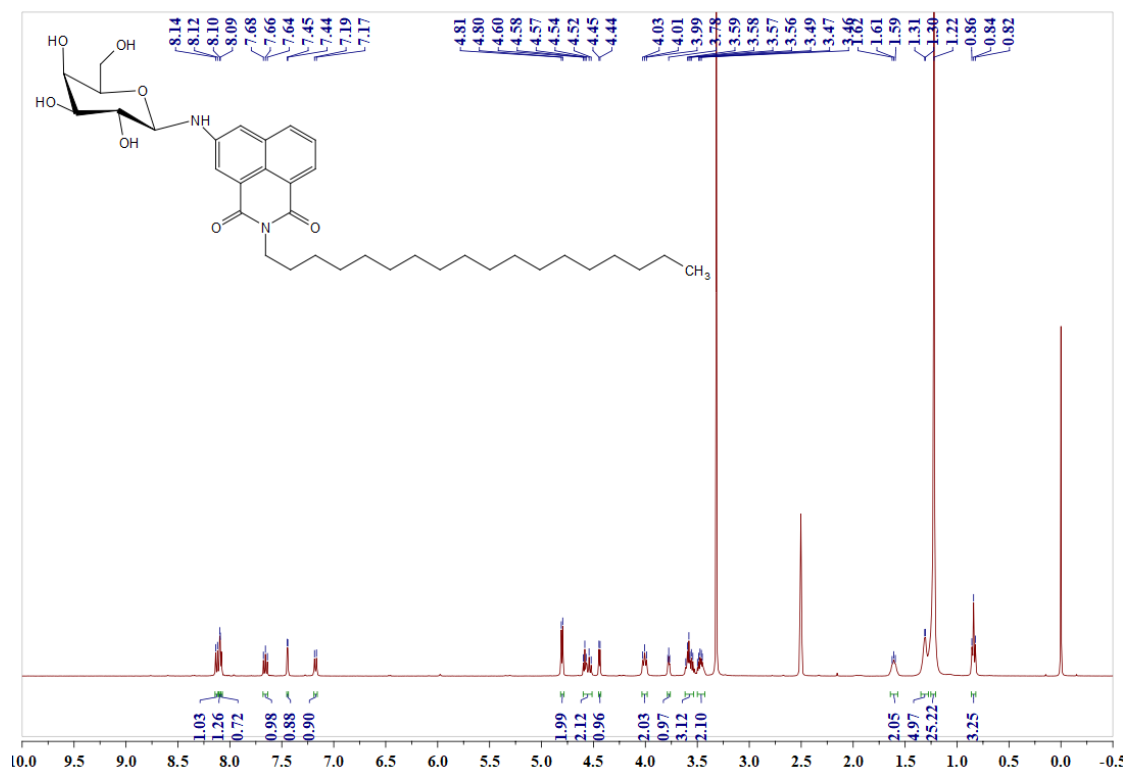

Figure S40. <sup>1</sup>H NMR Spectrum of compound 6g (400 MHz, DMSO-*d*<sub>6</sub>)

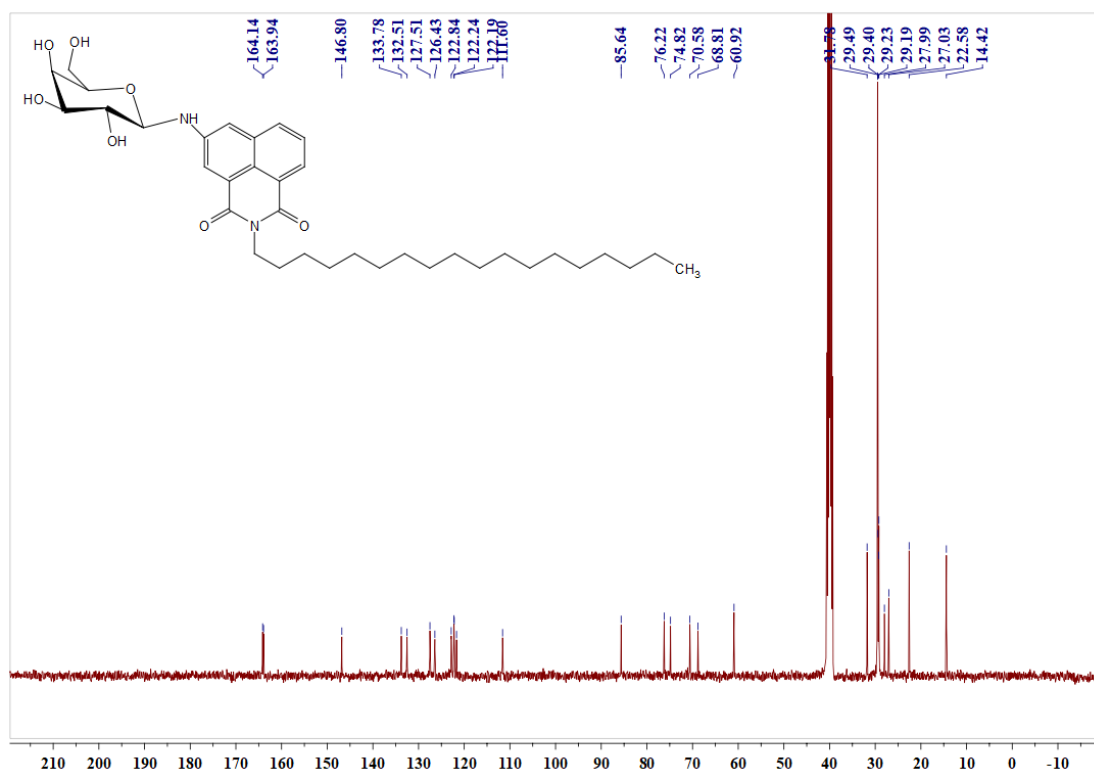

Figure S41. <sup>13</sup>C NMR Spectrum of compound 6g (101 MHz, DMSO-*d*<sub>6</sub>)

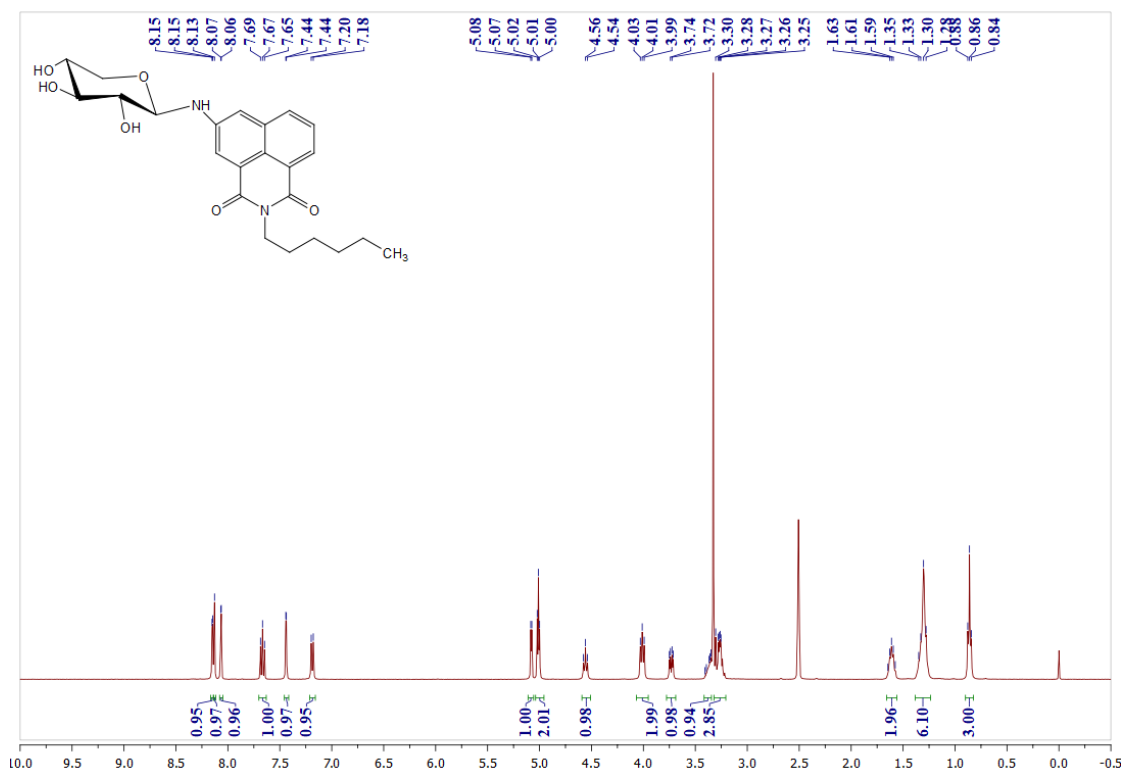

**Figure S42. <sup>1</sup>H NMR Spectrum of compound 7a (400 MHz, DMSO-*d*<sub>6</sub>)**

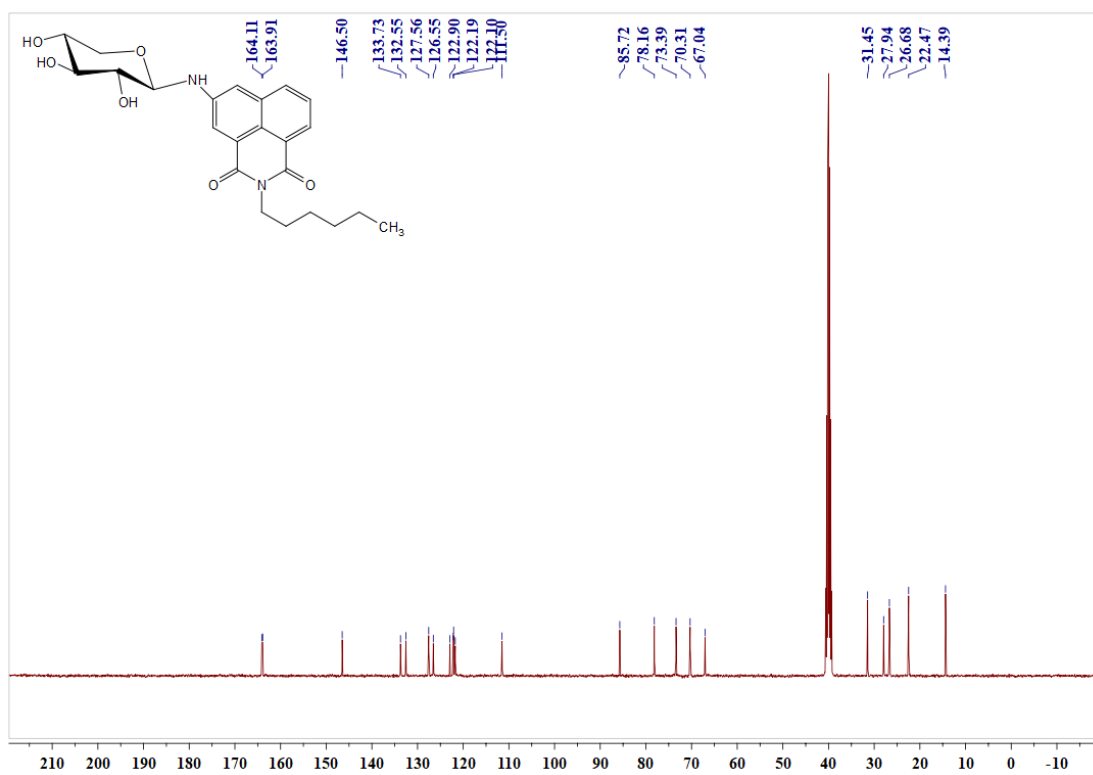

**Figure S43. <sup>13</sup>C NMR Spectrum of compound 7a (101 MHz, DMSO-*d*<sub>6</sub>)**

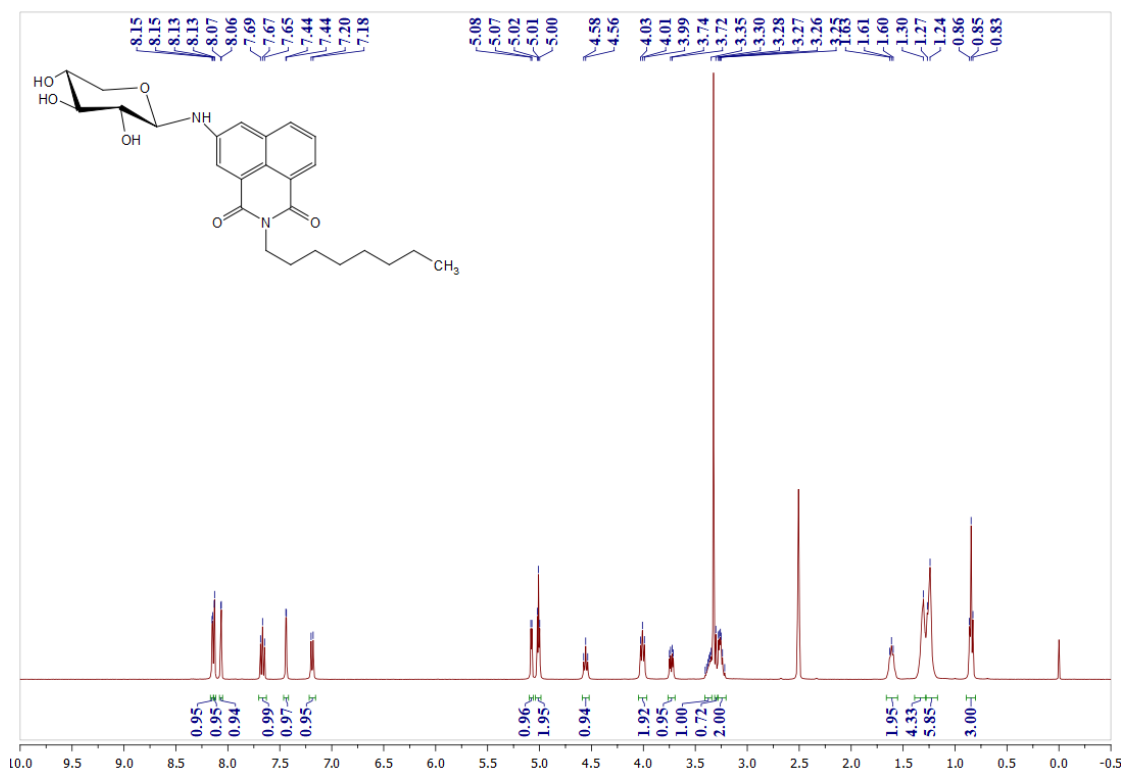

**Figure S44. <sup>1</sup>H NMR Spectrum of compound 7b (400 MHz, DMSO-*d*<sub>6</sub>)**

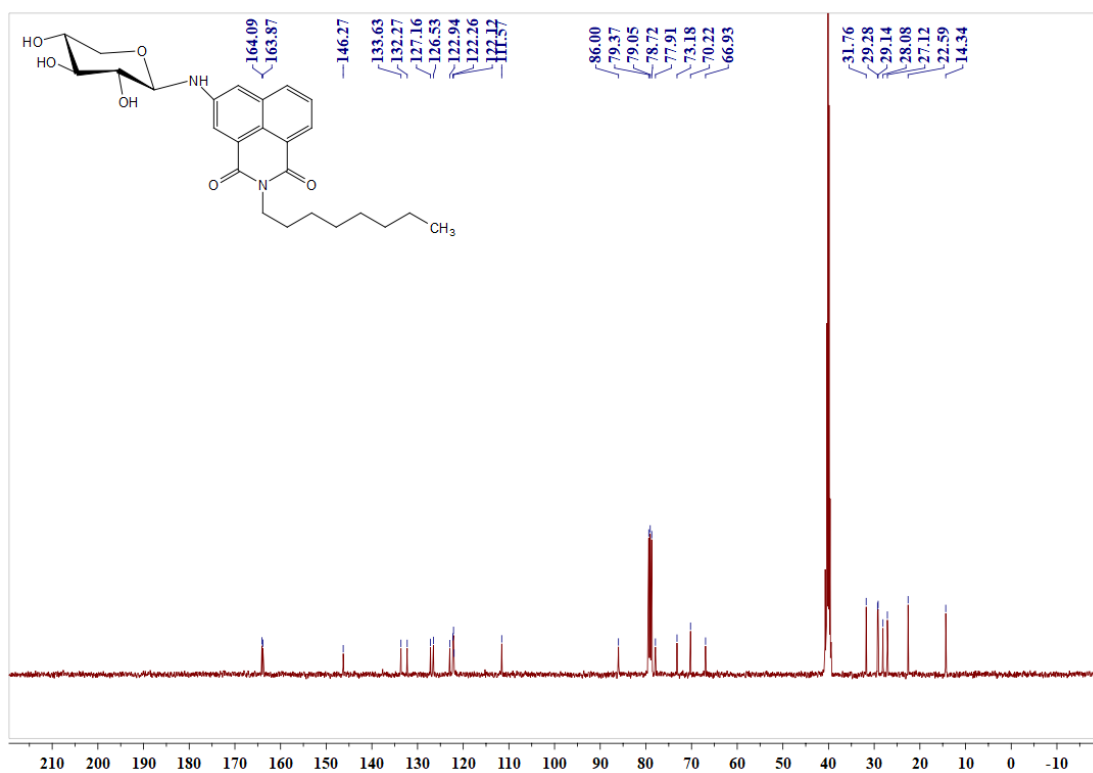

**Figure S45. <sup>13</sup>C NMR Spectrum of compound 7b (101 MHz, DMSO-*d*<sub>6</sub>)**

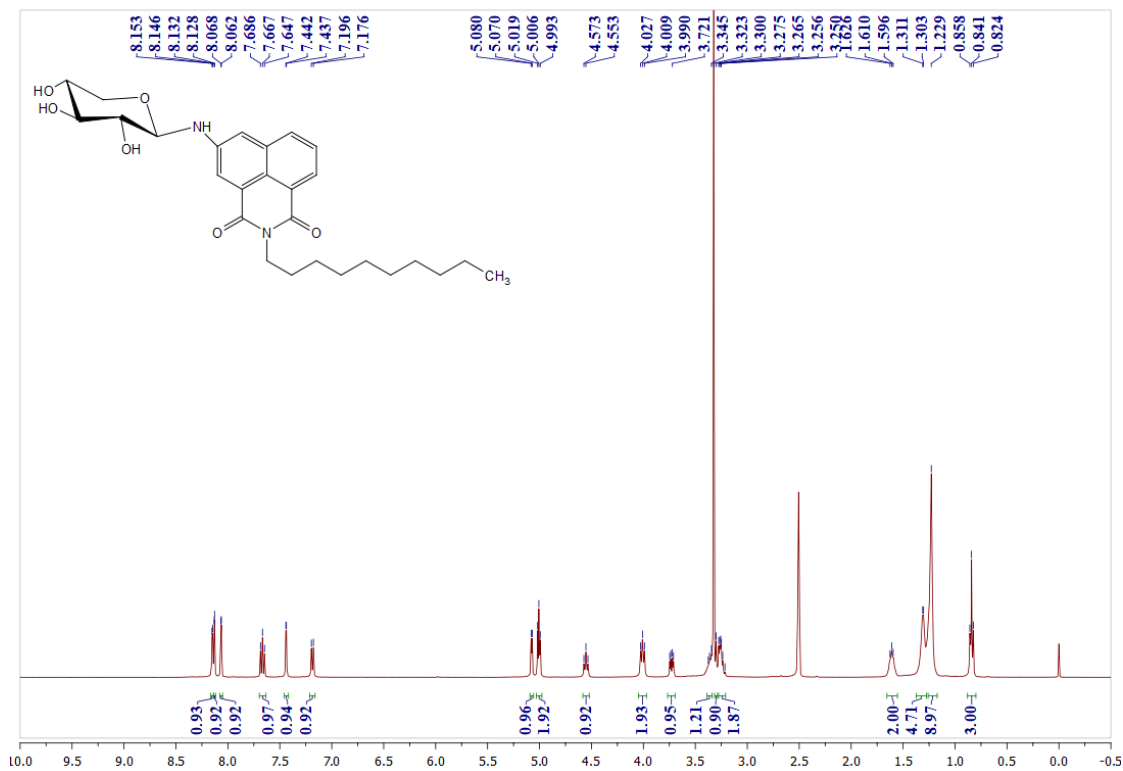

Figure S46.  $^1\text{H}$  NMR Spectrum of compound 7c (400 MHz,  $\text{DMSO-}d_6$ )

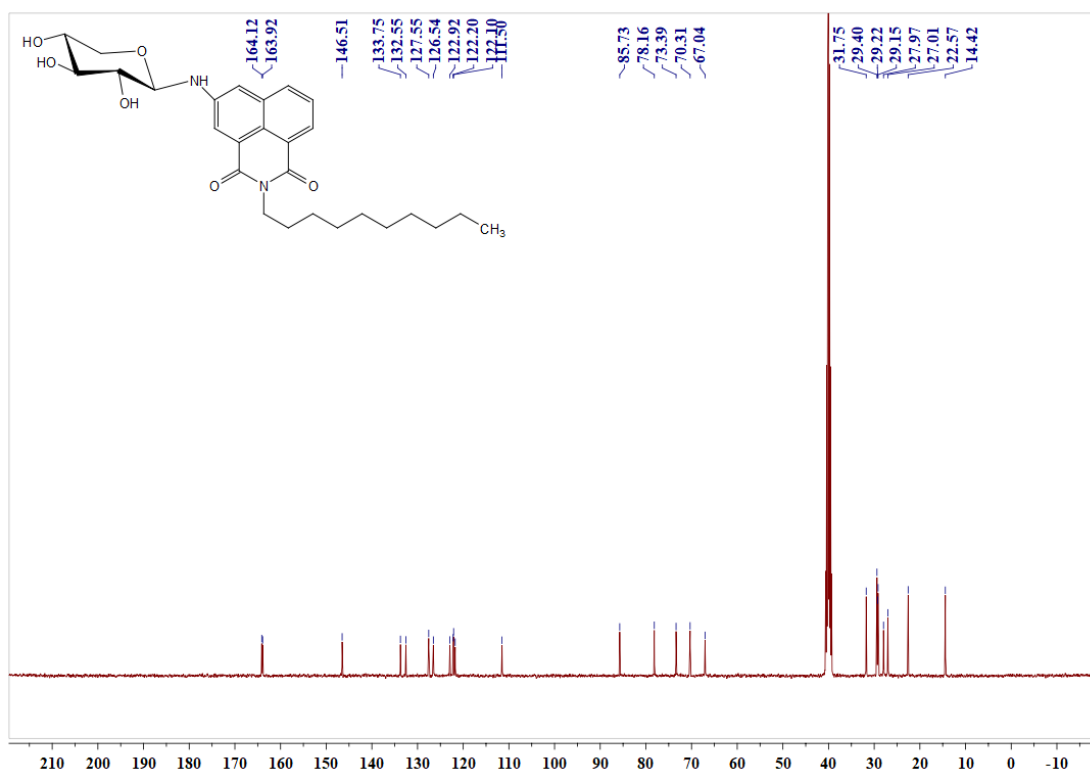

Figure S47.  $^{13}\text{C}$  NMR Spectrum of compound 7c (101 MHz,  $\text{DMSO-}d_6$ )





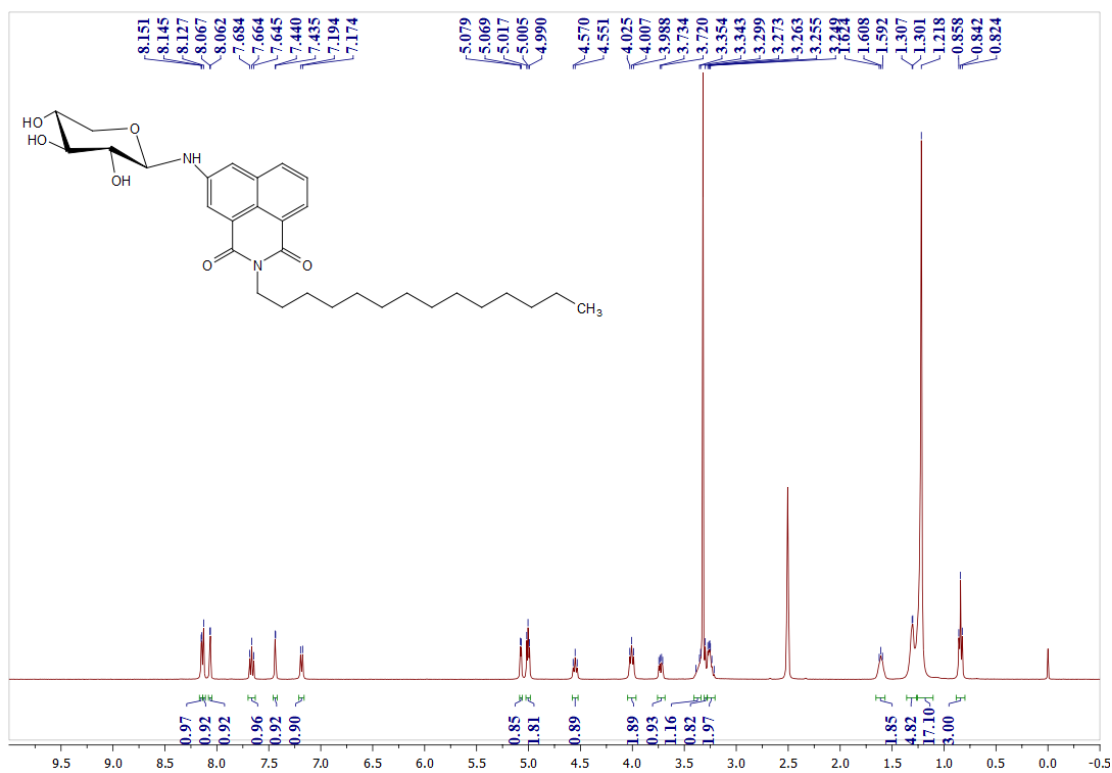

Figure S50. <sup>1</sup>H NMR Spectrum of compound 7e (400 MHz, DMSO-*d*<sub>6</sub>)

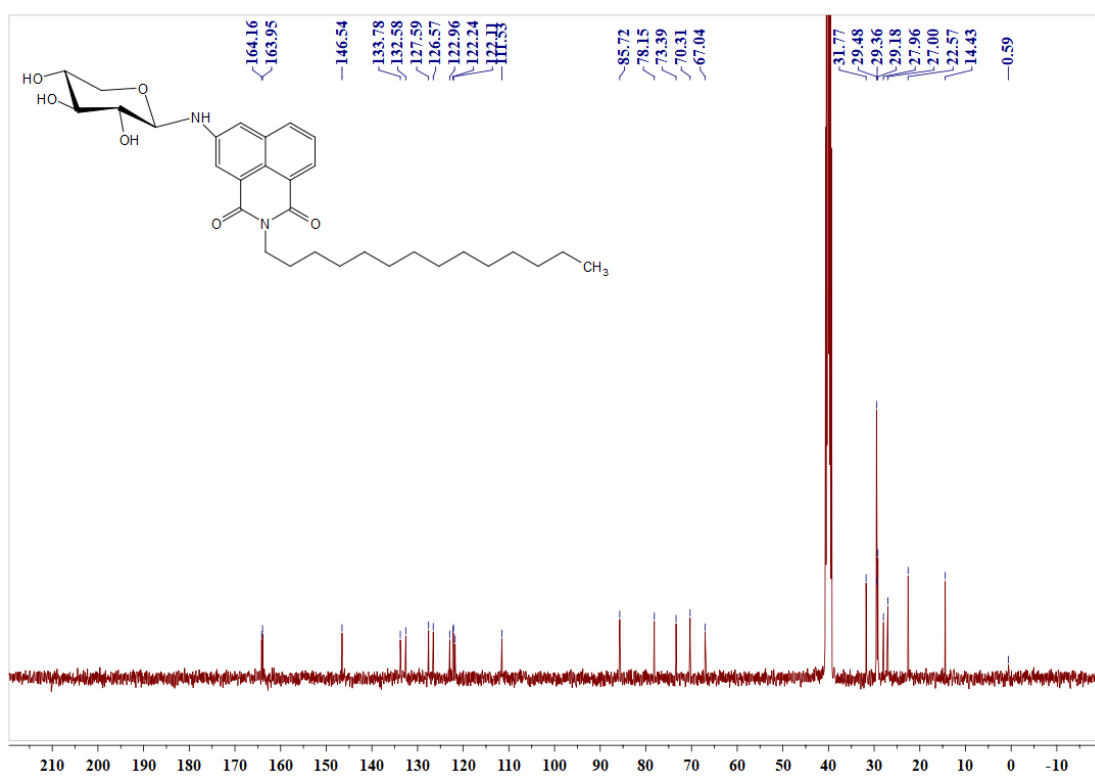

Figure S51. <sup>13</sup>C NMR Spectrum of compound 7e (101 MHz, DMSO-*d*<sub>6</sub>)

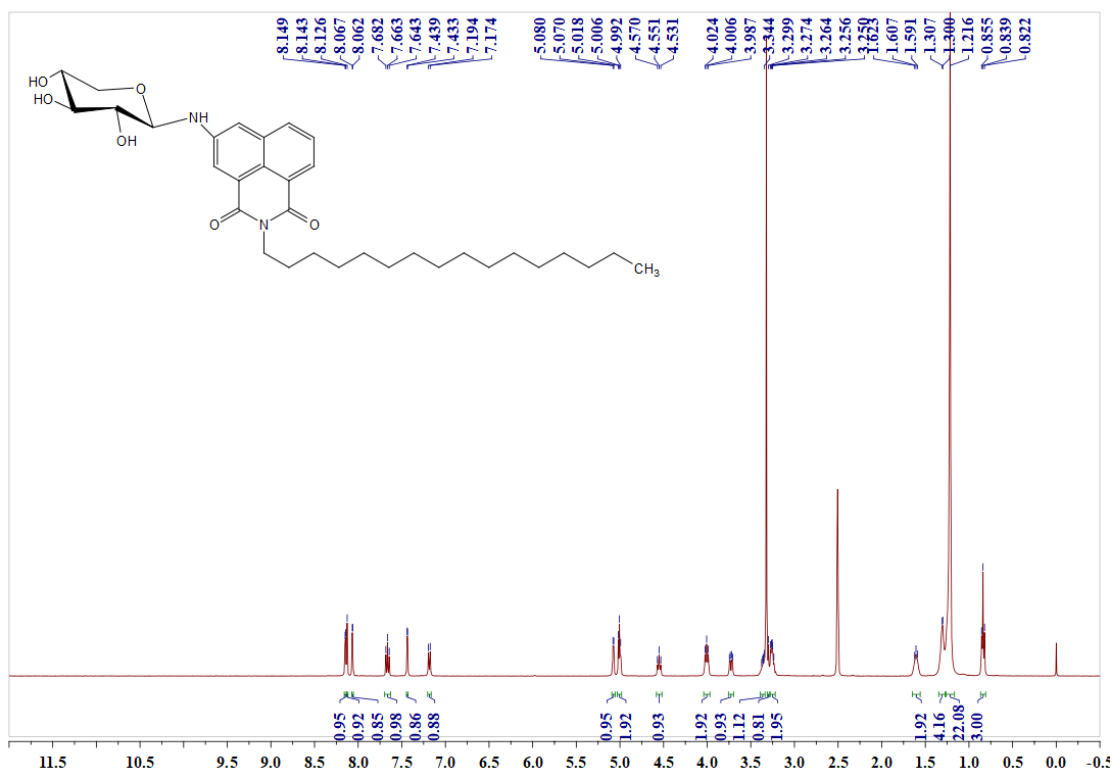

Figure S52. <sup>1</sup>H NMR Spectrum of compound 7f (400 MHz, DMSO-*d*<sub>6</sub>)

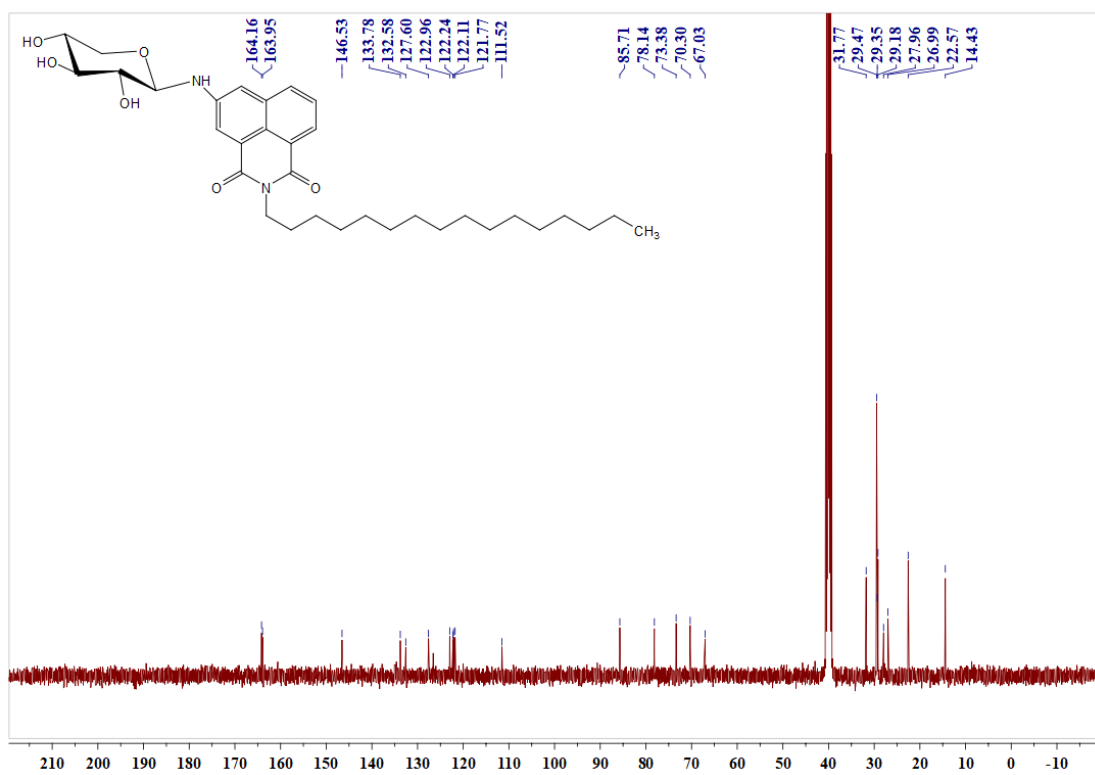

Figure S53. <sup>13</sup>C NMR Spectrum of compound 7f (101 MHz, DMSO-*d*<sub>6</sub>)

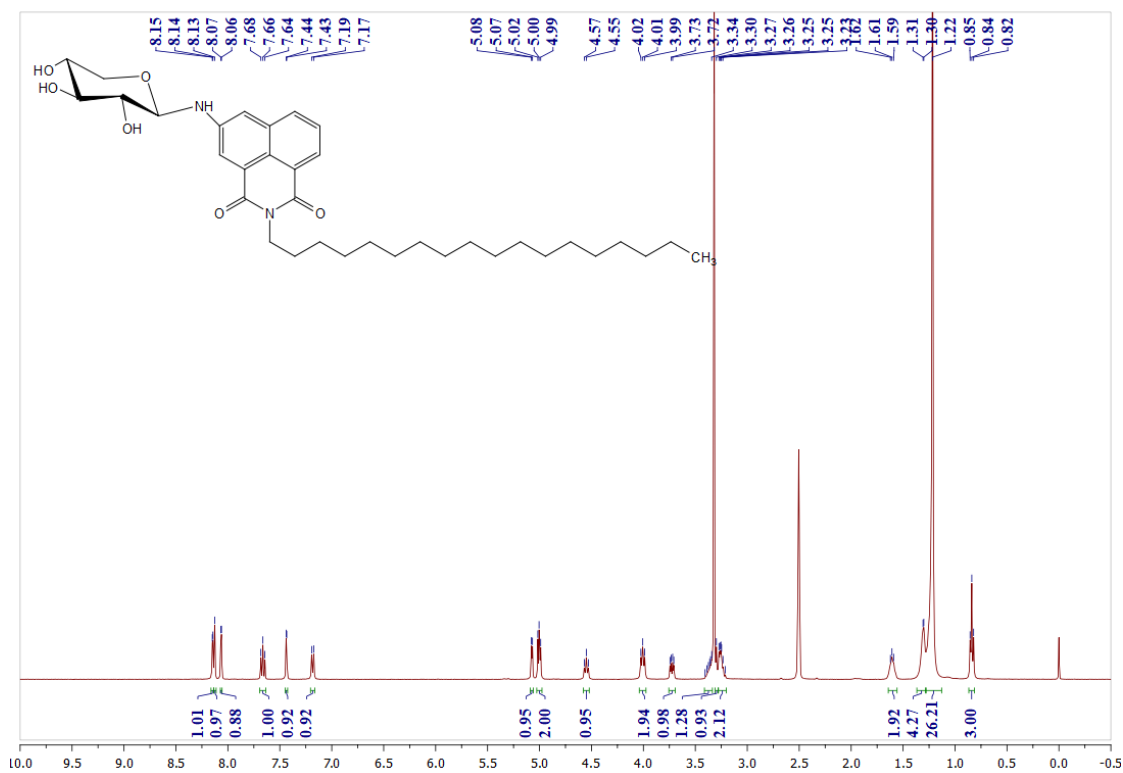

**Figure S54. <sup>1</sup>H NMR Spectrum of compound 7g (400 MHz, DMSO-*d*<sub>6</sub>)**

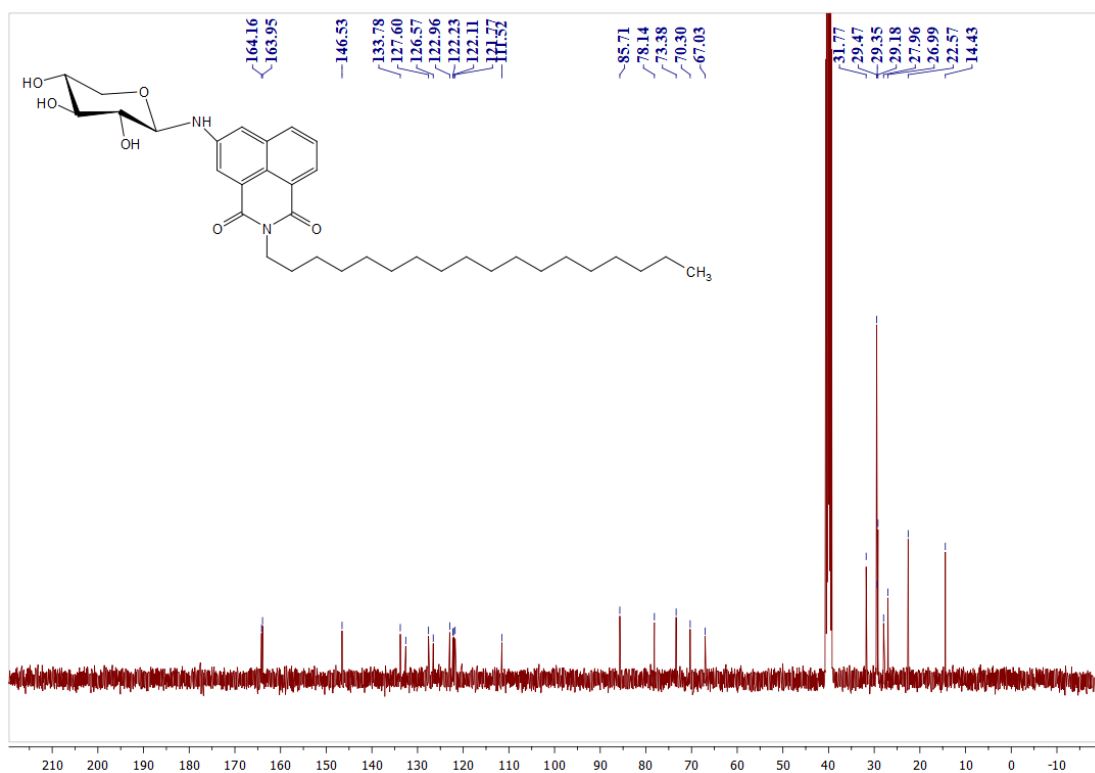

**Figure S55. <sup>13</sup>C NMR Spectrum of compound 7g (101 MHz, DMSO-*d*<sub>6</sub>)**

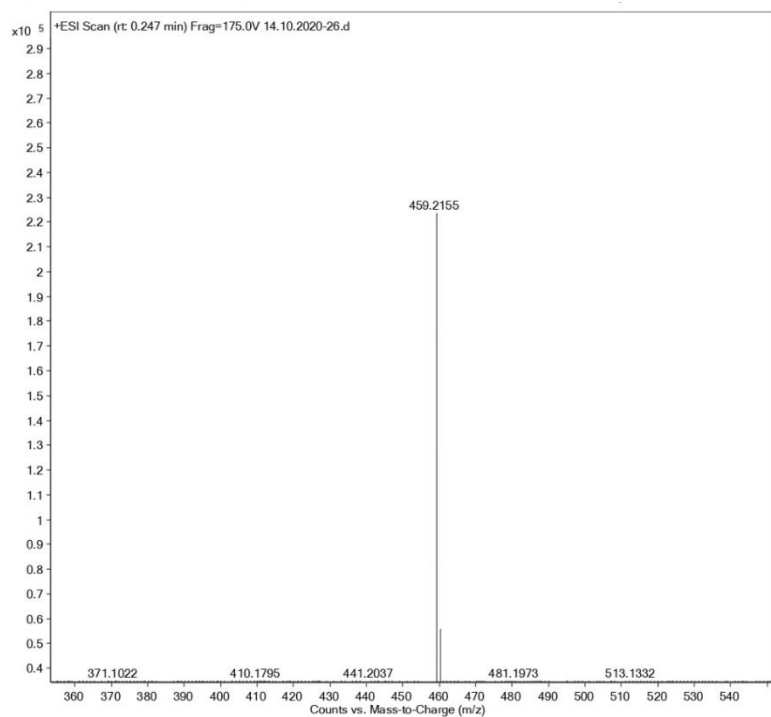

**Figure S56. HRMS Spectrum of compound 5a**

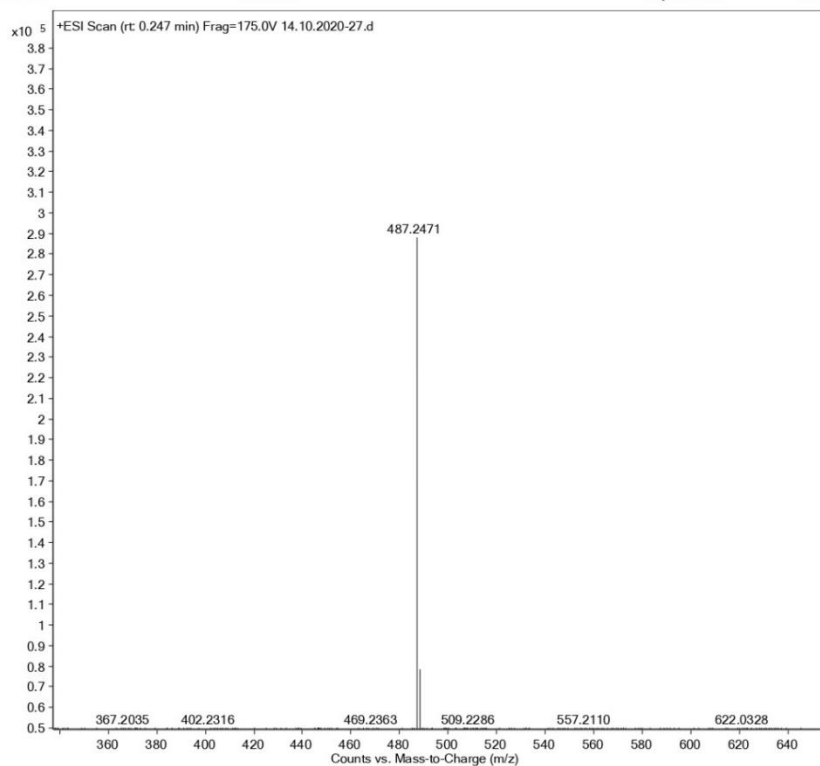

**Figure S57. HRMS Spectrum of compound 5b**

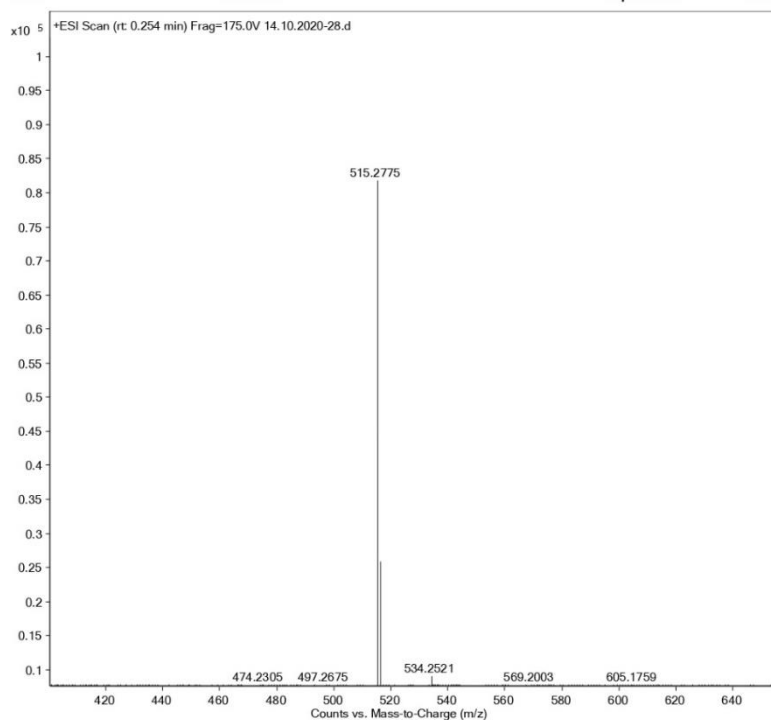

**Figure S58. HRMS Spectrum of compound 5c**

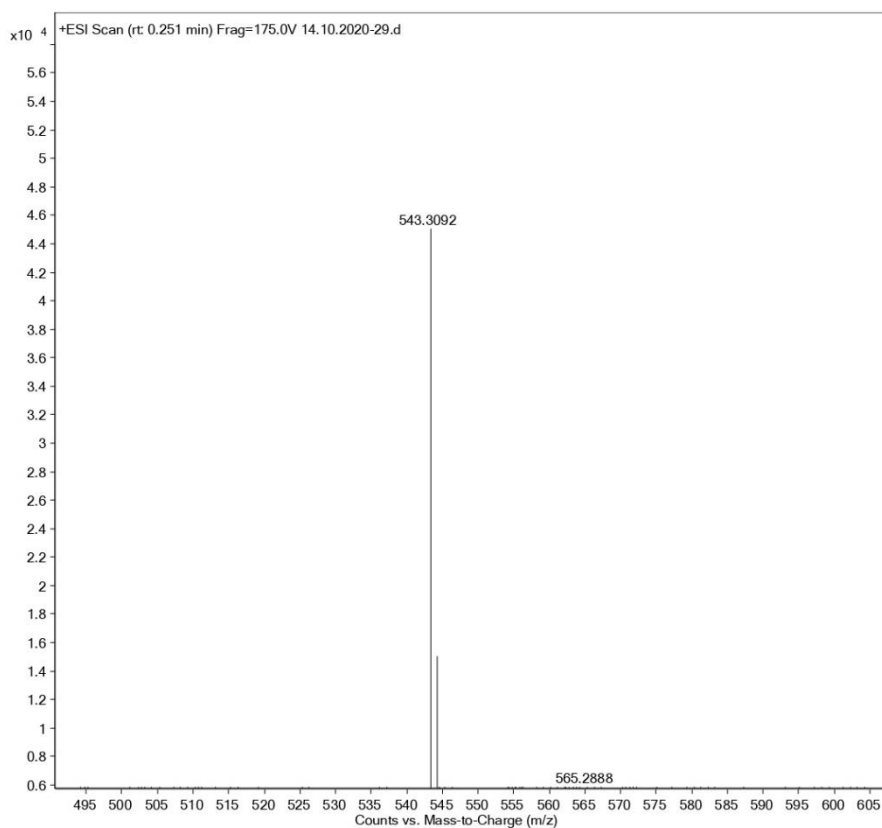

**Figure S59. HRMS Spectrum of compound 5d**

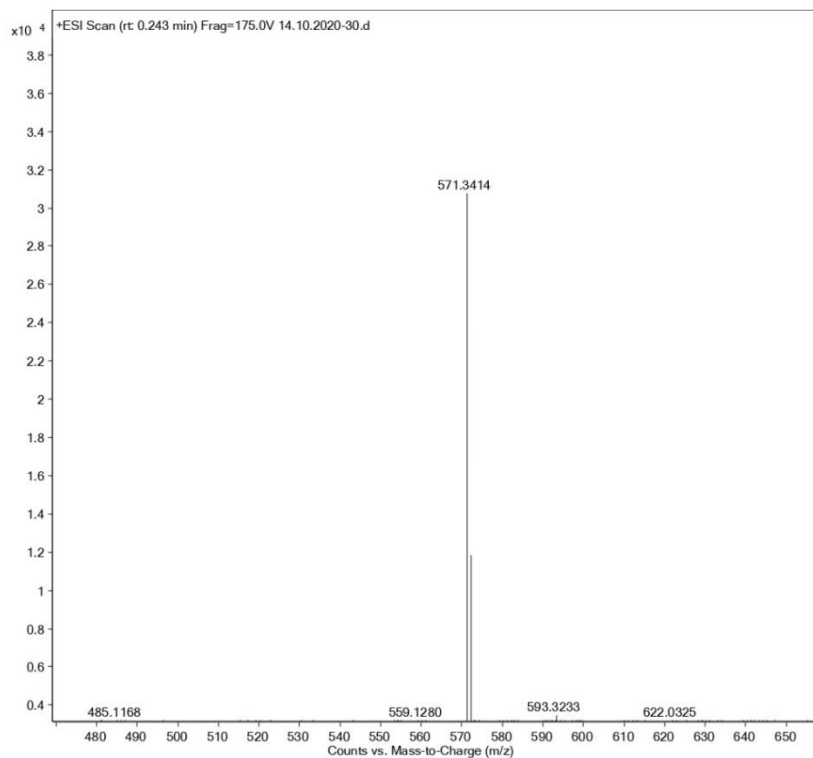

**Figure S60. HRMS Spectrum of compound 5e**

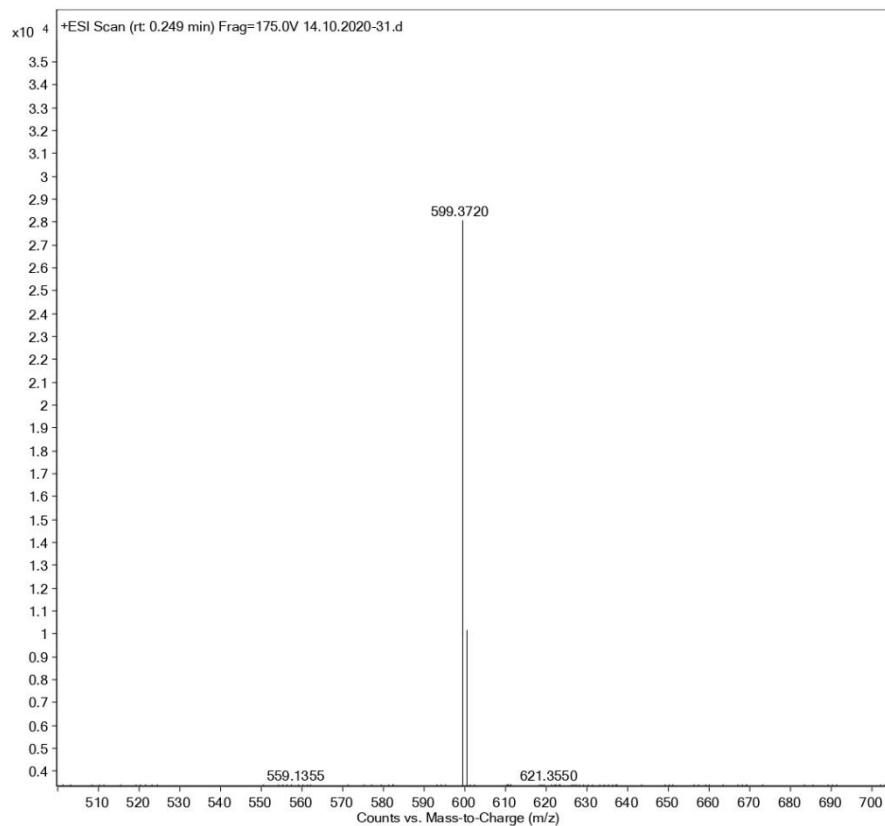

**Figure S61. HRMS Spectrum of compound 5f**

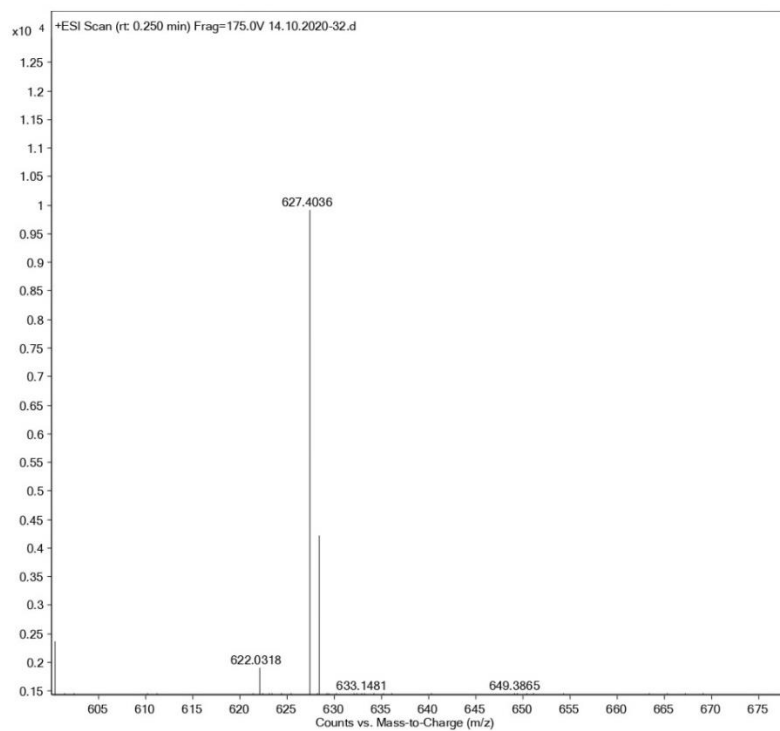

**Figure S62. HRMS Spectrum of compound 5g**

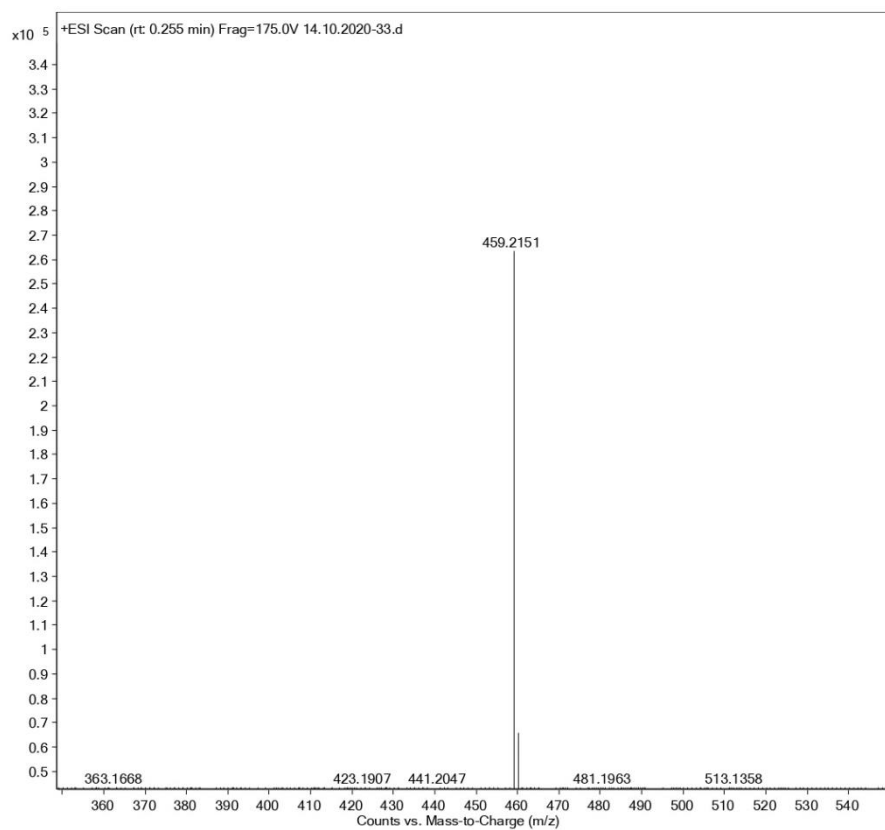

**Figure S63. HRMS Spectrum of compound 6a**



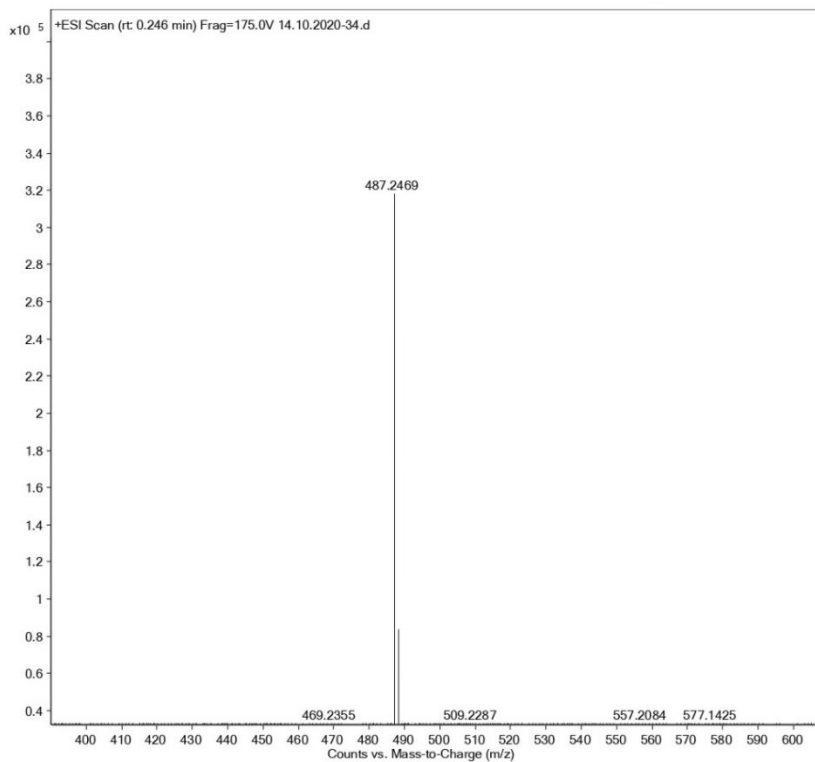

**Figure S64. HRMS Spectrum of compound 6b**

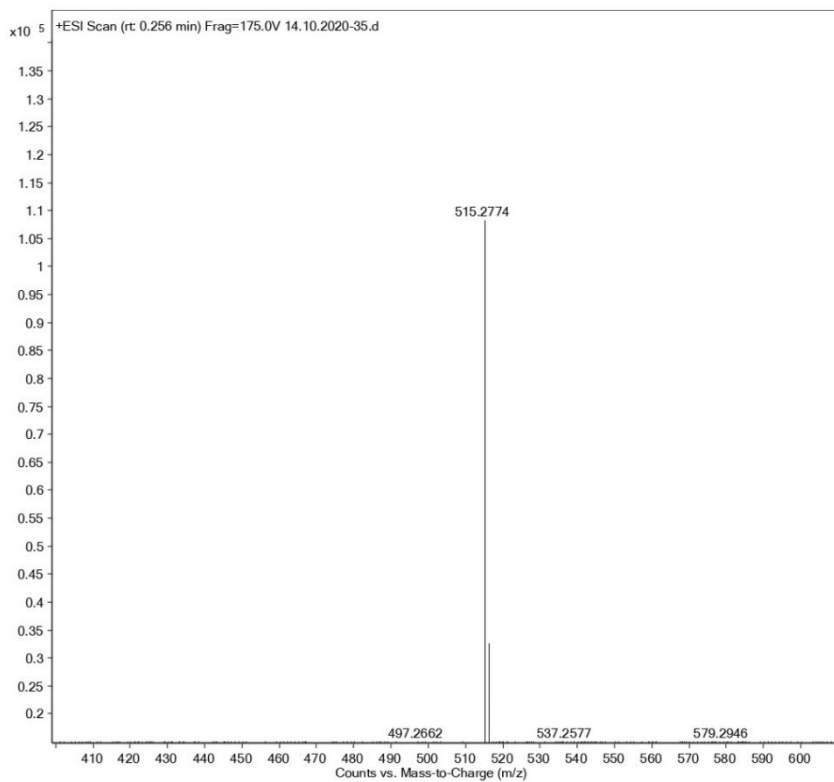

**Figure S65. HRMS Spectrum of compound 6c**

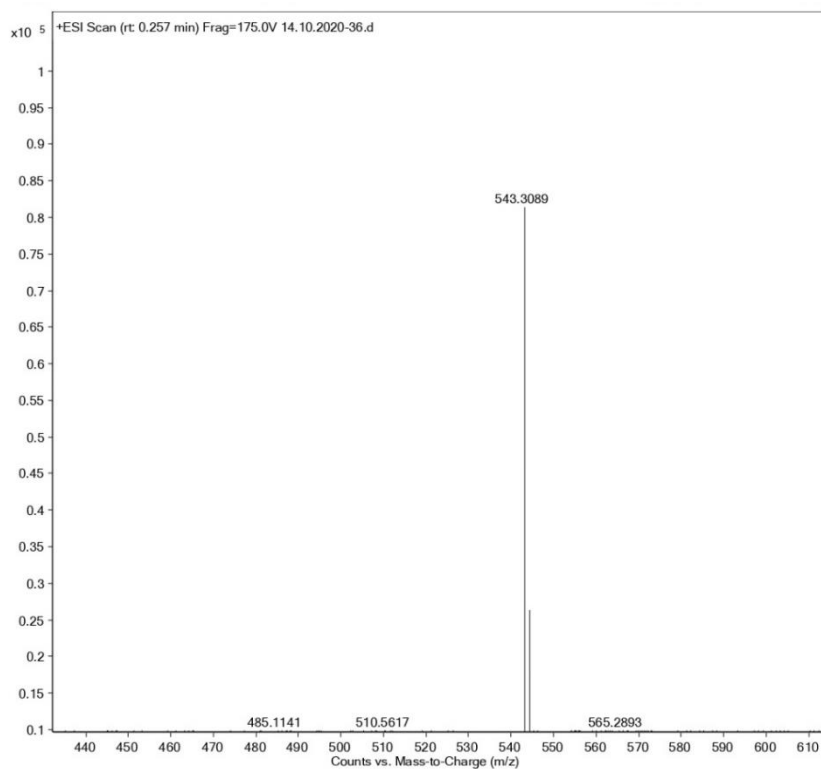

**Figure S66. HRMS Spectrum of compound 6d**

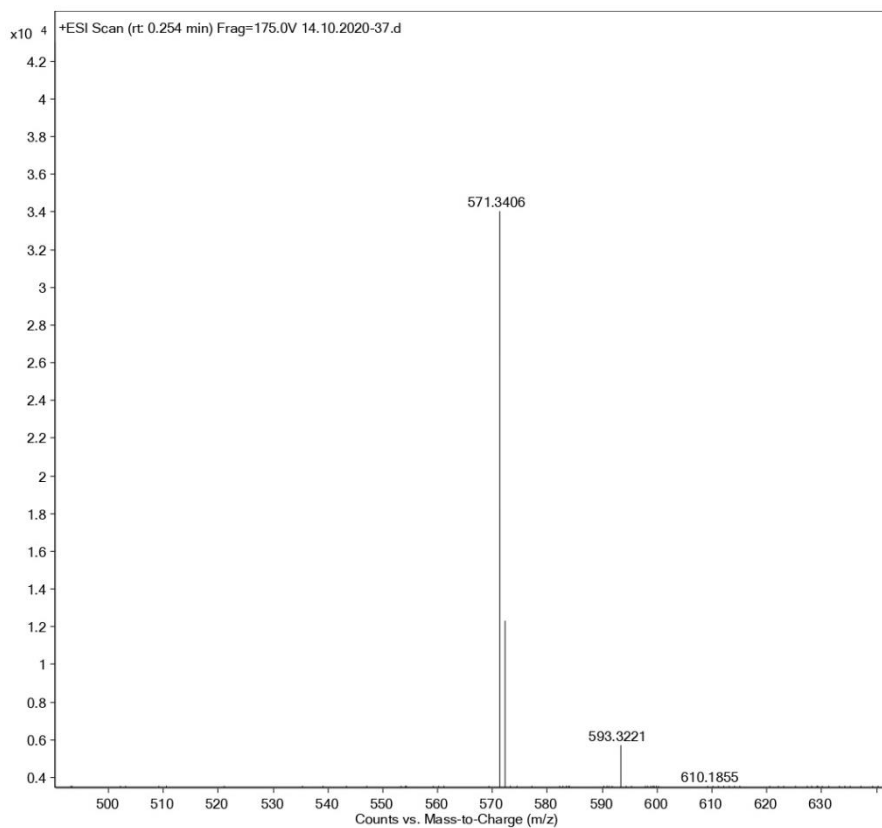

**Figure S67. HRMS Spectrum of compound 6e**

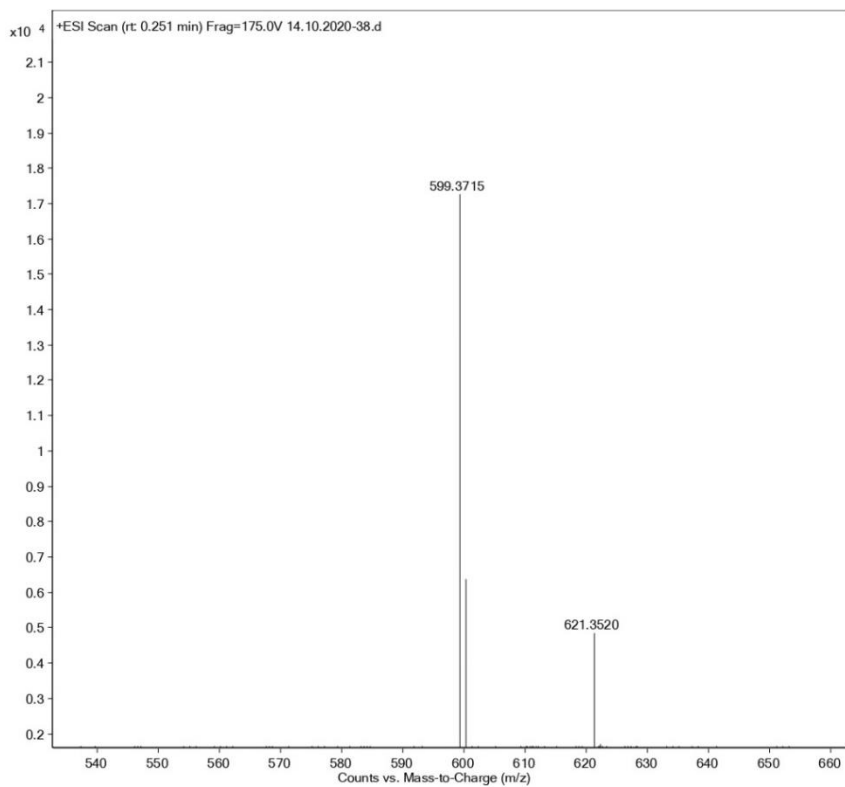

**Figure S68. HRMS Spectrum of compound 6f**

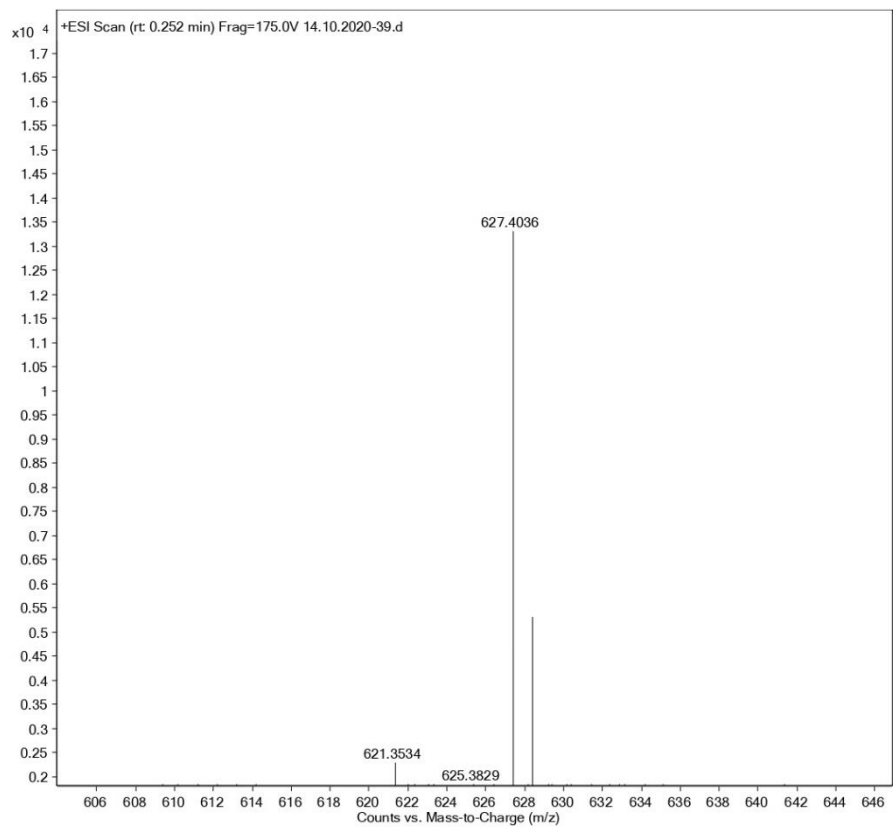

**Figure S69. HRMS Spectrum of compound 6g**

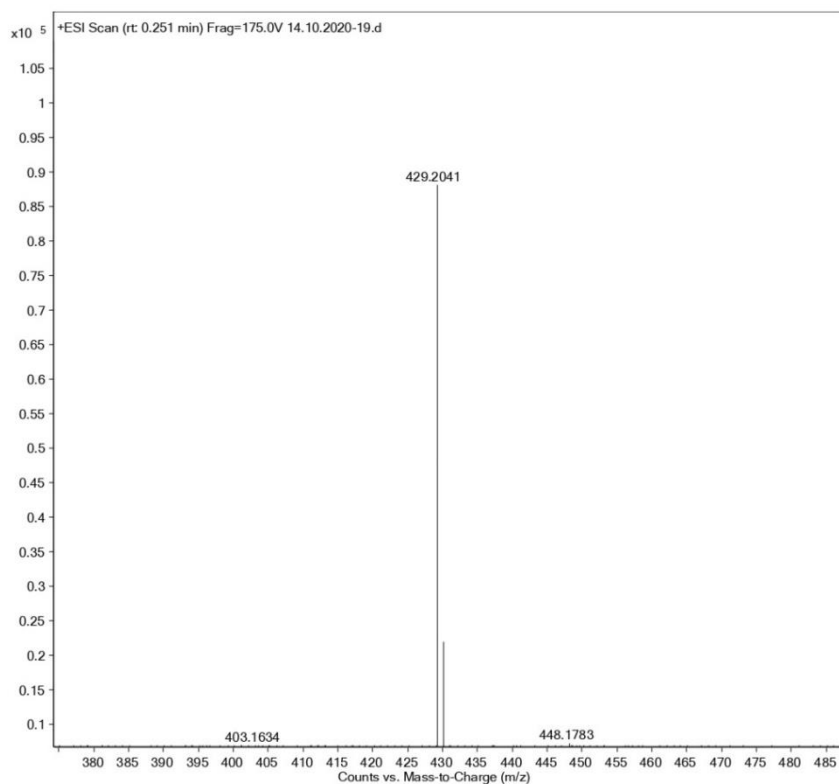

**Figure S70. HRMS Spectrum of compound 7a**

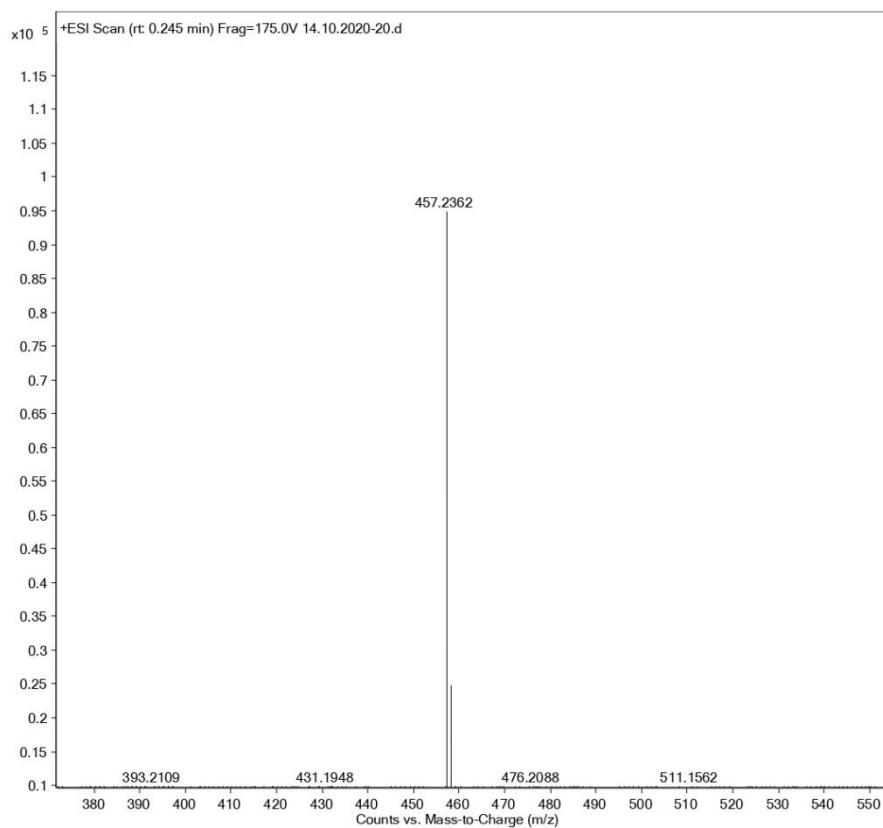

**Figure S71. HRMS Spectrum of compound 7b**

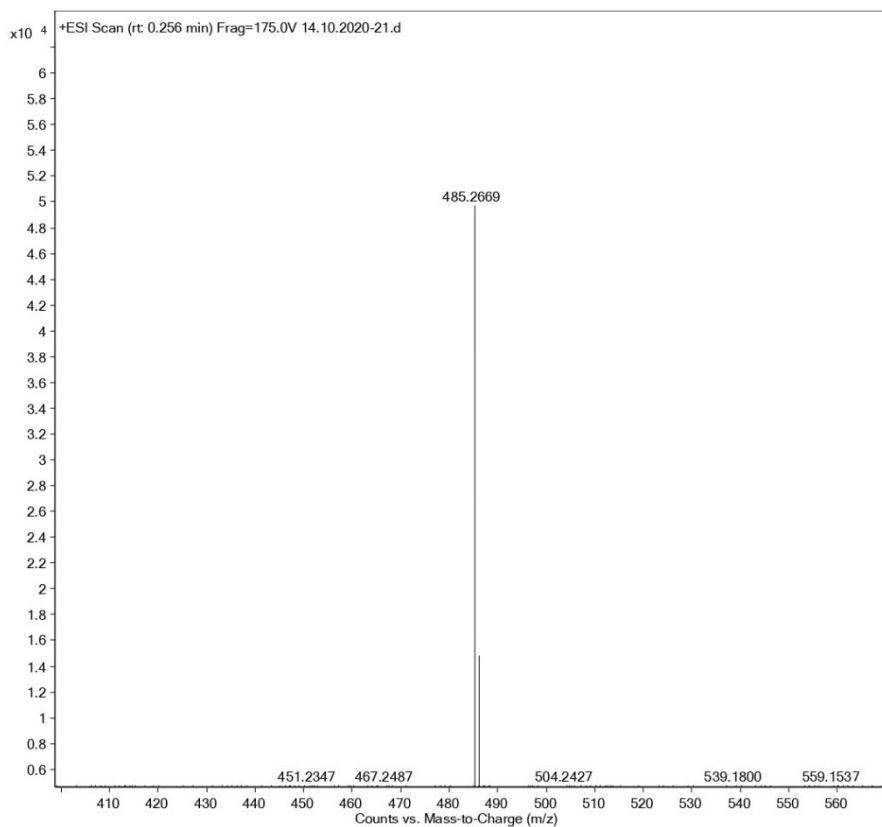

**Figure S72. HRMS Spectrum of compound 7c**

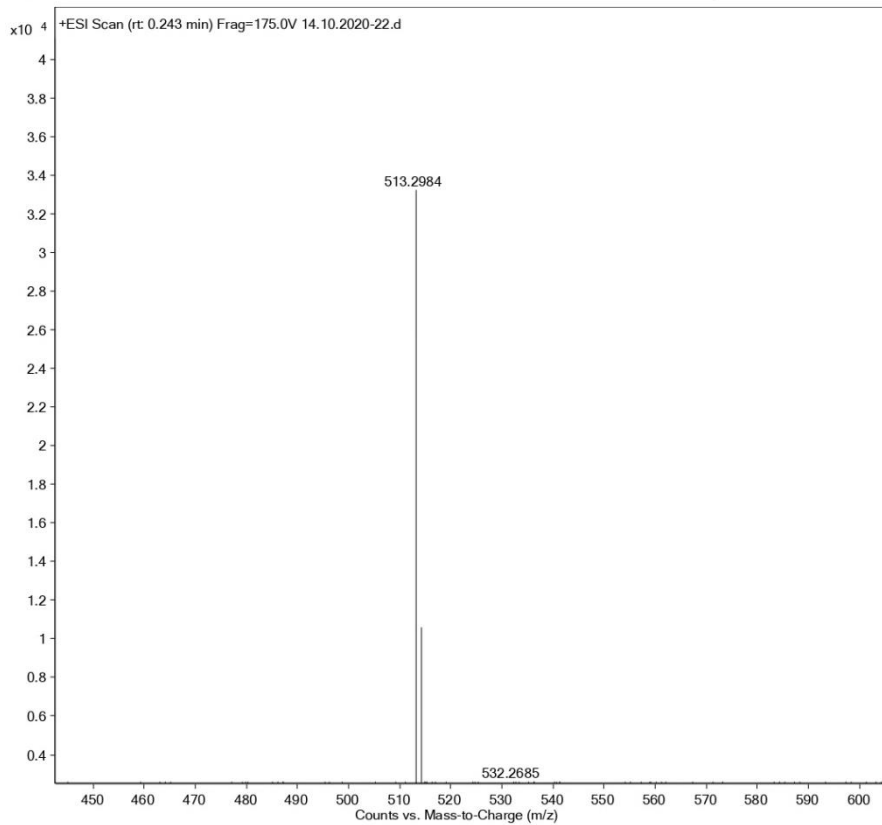

**Figure S73. HRMS Spectrum of compound 7d\**

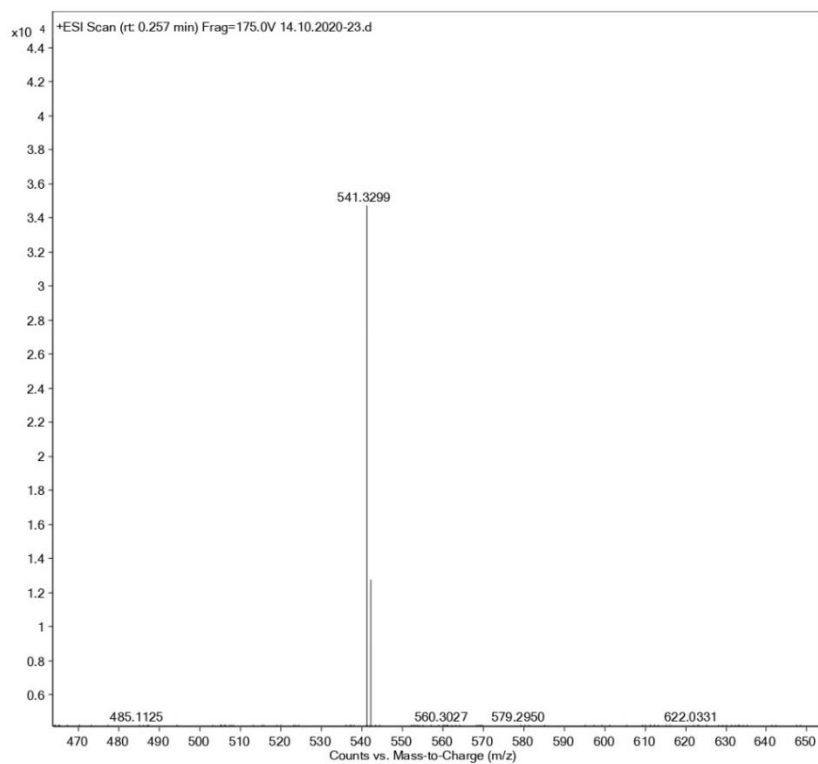

**Figure S74. HRMS Spectrum of compound 7e**

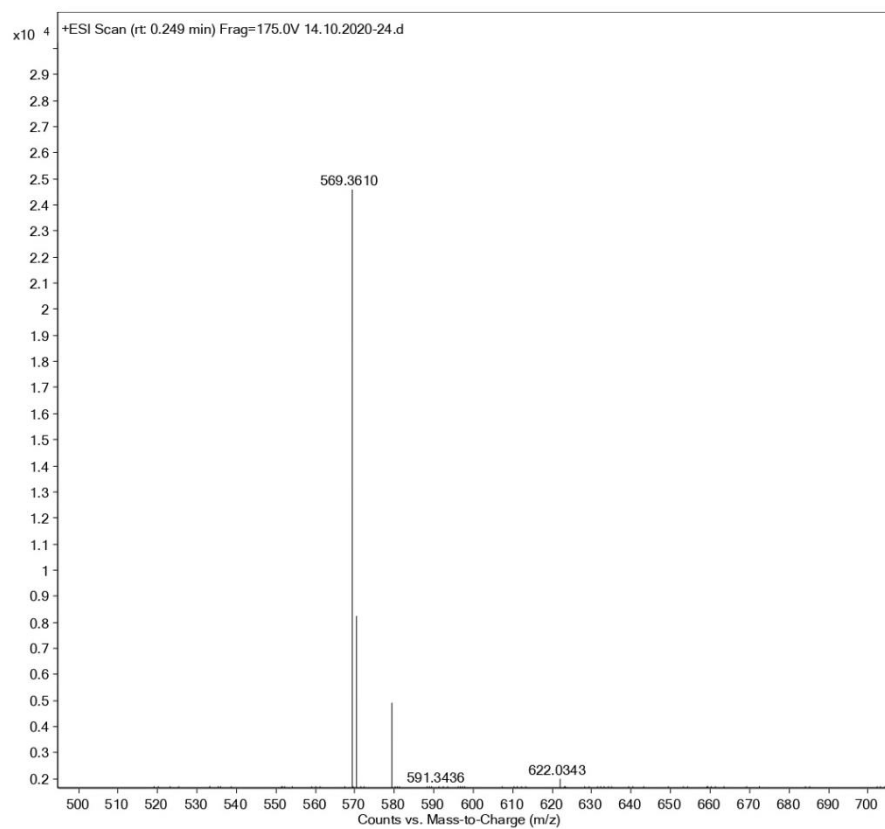

**Figure S75. HRMS Spectrum of compound 7f**

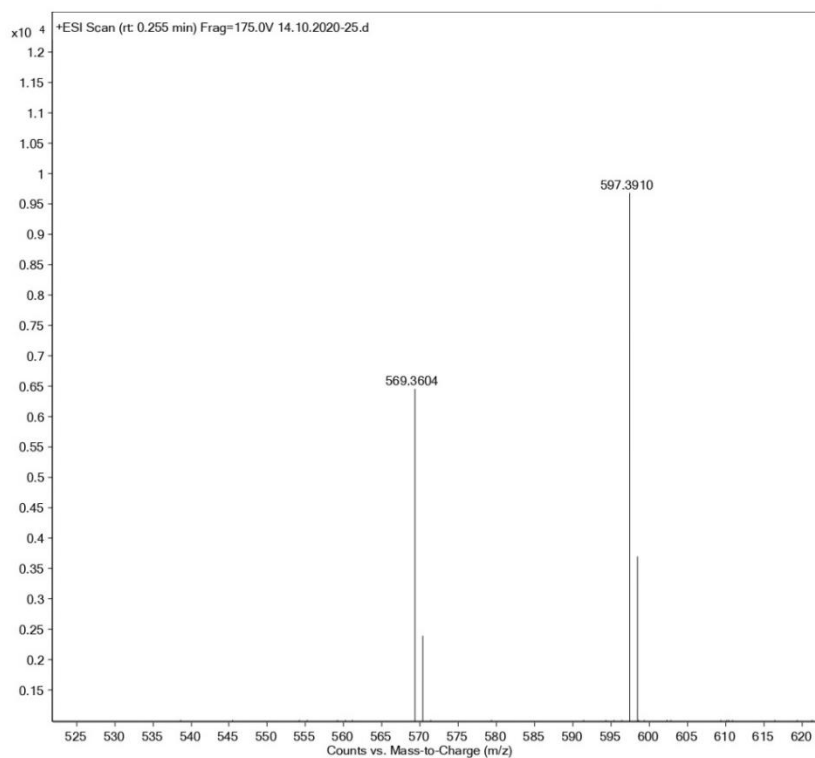

**Figure S76.** HRMS Spectrum of compound 7g

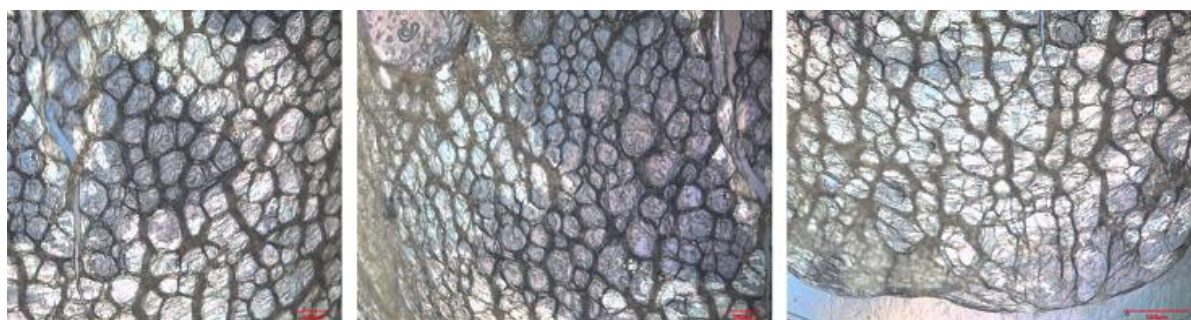

**Figure S77.** Optical microscopic images of the gel formed by 5d in  $\text{CHCl}_3$
